# Supplementary material for: Early-Life Famine Exposure and the Risk of Depression and Anxiety in Adulthood: Evidence from the China Multi-Ethnic Cohort (CMEC)
Source: Research Square preprint supplement (doi:10.21203/rs.3.rs-6595915/v1), 2025-06-10
Supplement: Supplementary file 1 [file abb18e815af906e4041f5eb6.xlsx]

## Sheet: Sheet1
PHQ9	Depression	GAD7	Anxiety	Comorbidity_of_Depression_and_Anxiety	Depression_Anxiety_total_score	Depression_or_Anxiety	Famine_Group	Nation	Age	Sex	Education	Hukou	marital_status	Annual_household_income	Smoke	Drinking	BMI	Waist	Hip_measurement	Hypertension	Diabetes
0	0	0	0	0	0	1	childhood exposure	Han	66	male	Primary school and below	1	Married/cohabiting	<20000	Don't smoke	Yes	Overweight	79	89.5	No	No
0	0	0	0	0	0	1	non-exposed	Han	48	male	Middle school or high school	1	Married/cohabiting	20000~99999	Don't smoke	Yes	Overweight	79.5	89.5	No	No
0	0	0	0	0	0	1	non-exposed	Han	46	male	Middle school or high school	1	Married/cohabiting	>1000000	Don't smoke	Yes	Overweight	110	112	No	No
0	0	0	0	0	0	1	childhood exposure	Han	66	male	University and above	2	Married/cohabiting	<20000	Don't smoke	Yes	Overweight	91	91	No	No
1	0	1	0	0	2	1	non-exposed	Han	41	male	Middle school or high school	3	Married/cohabiting	<20000	Don't smoke	Yes	Overweight	85	93	No	Yes
0	0	0	0	0	0	1	non-exposed	Han	48	male	University and above	3	Married/cohabiting	>1000000	Don't smoke	Yes	Overweight	89	97.5	Yes	No
0	0	0	0	0	0	1	adolescent exposure	Han	73	male	Primary school and below	1	Married/cohabiting	<20000	Don't smoke	Yes	Not overweight	71	84	No	No
0	0	0	0	0	0	1	childhood exposure	Han	66	male	Primary school and below	1	Married/cohabiting	20000~99999	Don't smoke	Yes	Not overweight	82	87	Yes	No
0	0	0	0	0	0	1	childhood exposure	Han	65	male	Primary school and below	1	Married/cohabiting	<20000	Don't smoke	Yes	Overweight	91	102.8	No	No
2	0	2	0	0	4	0	childhood exposure	Han	63	male	Primary school and below	1	Married/cohabiting	<20000	Don't smoke	Yes	Overweight	89.5	94.5	No	No
2	0	1	0	0	3	0	fetal exposure	Han	59	male	Primary school and below	1	Married/cohabiting	<20000	Don't smoke	Yes	Overweight	82.1	93.6	Yes	No
2	0	2	0	0	4	0	fetal exposure	Han	59	male	Primary school and below	1	Married/cohabiting	<20000	Don't smoke	Yes	Overweight	86	91	Yes	No
0	0	0	0	0	0	1	non-exposed	Han	53	male	Primary school and below	1	Married/cohabiting	<20000	Don't smoke	Yes	Overweight	86	87	No	No
2	0	2	0	0	4	0	non-exposed	Han	51	male	Primary school and below	1	Married/cohabiting	<20000	Don't smoke	Yes	Overweight	95.5	94.5	Yes	No
0	0	0	0	0	0	1	non-exposed	Han	50	male	Primary school and below	1	Married/cohabiting	<20000	Don't smoke	Yes	Overweight	71	90	No	No
0	0	0	0	0	0	1	non-exposed	Han	50	male	Primary school and below	1	Married/cohabiting	<20000	Don't smoke	Yes	Overweight	94	103	Yes	No
0	0	0	0	0	0	1	non-exposed	Han	49	male	Primary school and below	1	Married/cohabiting	<20000	Don't smoke	Yes	Overweight	86	92	No	No
0	0	0	0	0	0	1	childhood exposure	Han	65	male	Middle school or high school	1	Married/cohabiting	<20000	Don't smoke	Yes	Overweight	92	93	Yes	No
0	0	0	0	0	0	1	childhood exposure	Han	62	male	Middle school or high school	1	Married/cohabiting	<20000	Don't smoke	Yes	Overweight	76	92	Yes	No
2	0	2	0	0	4	0	fetal exposure	Han	58	male	Middle school or high school	1	Married/cohabiting	<20000	Don't smoke	Yes	Overweight	85	99	Yes	No
0	0	0	0	0	0	1	non-exposed	Han	56	male	Middle school or high school	1	Married/cohabiting	<20000	Don't smoke	Yes	Overweight	87	94	Yes	No
2	0	4	1	0	6	0	non-exposed	Han	55	male	Middle school or high school	1	Married/cohabiting	<20000	Don't smoke	Yes	Overweight	77	91	No	No
2	0	1	0	0	3	0	non-exposed	Han	55	male	Middle school or high school	1	Married/cohabiting	<20000	Don't smoke	Yes	Overweight	83	88.2	Yes	No
2	0	0	0	0	2	1	non-exposed	Han	53	male	Middle school or high school	1	Married/cohabiting	<20000	Don't smoke	Yes	Overweight	90	95.5	Yes	No
0	0	0	0	0	0	1	non-exposed	Han	52	male	Middle school or high school	1	Married/cohabiting	<20000	Don't smoke	Yes	Overweight	86	91	Yes	No
0	0	0	0	0	0	1	non-exposed	Han	46	male	Middle school or high school	1	Married/cohabiting	<20000	Don't smoke	Yes	Overweight	79.6	89.8	Yes	No
0	0	0	0	0	0	1	non-exposed	Han	46	male	Middle school or high school	1	Married/cohabiting	<20000	Don't smoke	Yes	Overweight	86	96	No	No
2	0	2	0	0	4	0	non-exposed	Han	45	male	Middle school or high school	1	Married/cohabiting	<20000	Don't smoke	Yes	Overweight	87.2	88.2	No	No
0	0	1	0	0	1	1	adolescent exposure	Han	71	male	Primary school and below	1	Married/cohabiting	20000~99999	Don't smoke	Yes	Overweight	89	91	Yes	No
2	0	0	0	0	2	1	childhood exposure	Han	65	male	Primary school and below	1	Married/cohabiting	20000~99999	Don't smoke	Yes	Overweight	86	95	Yes	No
0	0	0	0	0	0	1	childhood exposure	Han	65	male	Primary school and below	1	Married/cohabiting	20000~99999	Don't smoke	Yes	Overweight	79	87	Yes	No
0	0	0	0	0	0	1	non-exposed	Han	56	male	Primary school and below	1	Married/cohabiting	20000~99999	Don't smoke	Yes	Overweight	83.1	88	No	No
0	0	0	0	0	0	1	non-exposed	Han	53	male	Primary school and below	1	Married/cohabiting	20000~99999	Don't smoke	Yes	Overweight	85.3	87	No	No
2	0	1	0	0	3	0	non-exposed	Han	50	male	Primary school and below	1	Married/cohabiting	20000~99999	Don't smoke	Yes	Overweight	87	93	Yes	No
0	0	0	0	0	0	1	non-exposed	Han	49	male	Primary school and below	1	Married/cohabiting	20000~99999	Don't smoke	Yes	Overweight	92	92	Yes	No
2	0	0	0	0	2	1	non-exposed	Han	44	male	Primary school and below	1	Married/cohabiting	20000~99999	Don't smoke	Yes	Overweight	98	101.5	No	No
3	1	3	1	1	0	1	fetal exposure	Han	59	male	Middle school or high school	1	Married/cohabiting	20000~99999	Don't smoke	Yes	Overweight	75	90	No	No
2	0	2	0	0	4	0	non-exposed	Han	56	male	Middle school or high school	1	Married/cohabiting	20000~99999	Don't smoke	Yes	Overweight	89	100	No	No
2	0	2	0	0	4	0	non-exposed	Han	55	male	Middle school or high school	1	Married/cohabiting	20000~99999	Don't smoke	Yes	Overweight	91	99	Yes	No
2	0	2	0	0	4	0	non-exposed	Han	54	male	Middle school or high school	1	Married/cohabiting	20000~99999	Don't smoke	Yes	Overweight	82	90.5	No	No
0	0	2	0	0	2	1	non-exposed	Han	53	male	Middle school or high school	1	Married/cohabiting	20000~99999	Don't smoke	Yes	Overweight	101.5	102	No	No
2	0	2	0	0	4	0	non-exposed	Han	53	male	Middle school or high school	1	Married/cohabiting	20000~99999	Don't smoke	Yes	Overweight	74	90	No	No
1	0	0	0	0	1	1	non-exposed	Han	52	male	Middle school or high school	1	Married/cohabiting	20000~99999	Don't smoke	Yes	Overweight	75	86	Yes	No
0	0	0	0	0	0	1	non-exposed	Han	52	male	Middle school or high school	1	Married/cohabiting	20000~99999	Don't smoke	Yes	Overweight	105	103	No	No
0	0	0	0	0	0	1	non-exposed	Han	52	male	Middle school or high school	1	Married/cohabiting	20000~99999	Don't smoke	Yes	Overweight	89	94	No	No
2	0	3	1	0	5	0	non-exposed	Han	51	male	Middle school or high school	1	Married/cohabiting	20000~99999	Don't smoke	Yes	Overweight	87.5	98	No	No
0	0	0	0	0	0	1	non-exposed	Han	51	male	Middle school or high school	1	Married/cohabiting	20000~99999	Don't smoke	Yes	Overweight	91	97.2	No	No
0	0	0	0	0	0	1	non-exposed	Han	51	male	Middle school or high school	1	Married/cohabiting	20000~99999	Don't smoke	Yes	Overweight	83	95	No	No
2	0	2	0	0	4	0	non-exposed	Han	48	male	Middle school or high school	1	Married/cohabiting	20000~99999	Don't smoke	Yes	Overweight	92	100	No	No
2	0	2	0	0	4	0	non-exposed	Han	46	male	Middle school or high school	1	Married/cohabiting	20000~99999	Don't smoke	Yes	Overweight	85.3	91.8	No	No
0	0	0	0	0	0	1	non-exposed	Han	43	male	Middle school or high school	1	Married/cohabiting	20000~99999	Don't smoke	Yes	Overweight	100.4	101	Yes	No
0	0	0	0	0	0	1	non-exposed	Han	44	male	Middle school or high school	1	Married/cohabiting	>1000000	Don't smoke	Yes	Overweight	98	99	No	No
0	0	0	0	0	0	1	adolescent exposure	Han	73	male	Middle school or high school	2	Married/cohabiting	<20000	Don't smoke	Yes	Overweight	89	92.5	Yes	No
0	0	0	0	0	0	1	childhood exposure	Han	61	male	Middle school or high school	2	Married/cohabiting	<20000	Don't smoke	Yes	Overweight	78	95	Yes	No
2	0	2	0	0	4	0	non-exposed	Han	51	male	Middle school or high school	2	Married/cohabiting	<20000	Don't smoke	Yes	Overweight	96	106	Yes	No
0	0	0	0	0	0	1	non-exposed	Han	51	male	Middle school or high school	2	Married/cohabiting	<20000	Don't smoke	Yes	Overweight	95	100	No	No
1	0	1	0	0	2	1	adolescent exposure	Han	75	male	Middle school or high school	2	Married/cohabiting	20000~99999	Don't smoke	Yes	Overweight	94	94	No	No
0	0	0	0	0	0	1	non-exposed	Han	56	male	Middle school or high school	2	Married/cohabiting	20000~99999	Don't smoke	Yes	Overweight	97	103.5	Yes	No
1	0	0	0	0	1	1	non-exposed	Han	49	male	Middle school or high school	2	Married/cohabiting	20000~99999	Don't smoke	Yes	Overweight	83	95	No	No
0	0	0	0	0	0	1	non-exposed	Han	43	male	University and above	2	Married/cohabiting	20000~99999	Don't smoke	Yes	Overweight	85	95.8	No	No
0	0	0	0	0	0	1	childhood exposure	Han	67	male	Middle school or high school	2	Married/cohabiting	>1000000	Don't smoke	Yes	Overweight	84	93	Yes	No
0	0	0	0	0	0	1	non-exposed	Han	55	male	Middle school or high school	2	Married/cohabiting	>1000000	Don't smoke	Yes	Overweight	92.8	93	Yes	No
1	0	0	0	0	1	1	non-exposed	Han	42	male	University and above	2	Married/cohabiting	>1000000	Don't smoke	Yes	Overweight	90	99	Yes	No
0	0	0	0	0	0	1	non-exposed	Han	42	male	University and above	2	Married/cohabiting	>1000000	Don't smoke	Yes	Overweight	82	93	Yes	No
0	0	0	0	0	0	1	childhood exposure	Han	63	male	Primary school and below	3	Married/cohabiting	<20000	Don't smoke	Yes	Overweight	90.1	91.5	No	No
0	0	0	0	0	0	1	non-exposed	Han	51	male	University and above	2	Never married	>1000000	Don't smoke	Yes	Overweight	77.8	85.8	Yes	No
0	0	0	0	0	0	1	adolescent exposure	Han	72	male	Primary school and below	1	Married/cohabiting	<20000	Don't smoke	Yes	Not overweight	76	84	No	No
2	0	1	0	0	3	0	childhood exposure	Han	69	male	Primary school and below	1	Married/cohabiting	<20000	Don't smoke	Yes	Not overweight	79	84.5	No	No
0	0	0	0	0	0	1	childhood exposure	Han	64	male	Primary school and below	1	Married/cohabiting	<20000	Don't smoke	Yes	Not overweight	70	82	No	No
1	0	3	1	0	4	0	childhood exposure	Han	64	male	Primary school and below	1	Married/cohabiting	<20000	Don't smoke	Yes	Not overweight	71	83	No	No
0	0	0	0	0	0	1	non-exposed	Han	53	male	Primary school and below	1	Married/cohabiting	<20000	Don't smoke	Yes	Not overweight	68.8	87	No	No
0	0	0	0	0	0	1	adolescent exposure	Han	72	male	Middle school or high school	1	Married/cohabiting	<20000	Don't smoke	Yes	Not overweight	65	82.8	No	No
4	1	4	1	1	8	0	non-exposed	Han	52	male	Middle school or high school	1	Married/cohabiting	<20000	Don't smoke	Yes	Not overweight	73	87	No	No
0	0	0	0	0	0	1	non-exposed	Han	40	male	Middle school or high school	1	Married/cohabiting	<20000	Don't smoke	Yes	Not overweight	68	89	No	No
0	0	0	0	0	0	1	adolescent exposure	Han	71	male	Primary school and below	1	Married/cohabiting	20000~99999	Don't smoke	Yes	Not overweight	82.5	89	No	No
0	0	0	0	0	0	1	childhood exposure	Han	69	male	Primary school and below	1	Married/cohabiting	20000~99999	Don't smoke	Yes	Not overweight	81	87	No	No
0	0	0	0	0	0	1	childhood exposure	Han	66	male	Primary school and below	1	Married/cohabiting	20000~99999	Don't smoke	Yes	Not overweight	75	85	Yes	No
0	0	0	0	0	0	1	childhood exposure	Han	64	male	Primary school and below	1	Married/cohabiting	20000~99999	Don't smoke	Yes	Not overweight	64	81	No	No
0	0	0	0	0	0	1	non-exposed	Han	56	male	Primary school and below	1	Married/cohabiting	20000~99999	Don't smoke	Yes	Not overweight	78	91	Yes	No
2	0	0	0	0	2	1	non-exposed	Han	48	male	Primary school and below	1	Married/cohabiting	20000~99999	Don't smoke	Yes	Not overweight	71.8	83.9	No	No
0	0	0	0	0	0	1	childhood exposure	Han	61	male	Middle school or high school	1	Married/cohabiting	20000~99999	Don't smoke	Yes	Not overweight	83.2	85.9	No	No
0	0	0	0	0	0	1	fetal exposure	Han	59	male	Middle school or high school	1	Married/cohabiting	20000~99999	Don't smoke	Yes	Not overweight	81	81.5	Yes	No
0	0	0	0	0	0	1	non-exposed	Han	55	male	Middle school or high school	1	Married/cohabiting	20000~99999	Don't smoke	Yes	Not overweight	75.8	91.5	No	No
2	0	0	0	0	2	1	non-exposed	Han	48	male	Middle school or high school	1	Married/cohabiting	20000~99999	Don't smoke	Yes	Not overweight	80	90.5	No	No
2	0	1	0	0	3	0	non-exposed	Han	40	male	Middle school or high school	1	Married/cohabiting	20000~99999	Don't smoke	Yes	Not overweight	85	93	Yes	No
1	0	0	0	0	1	1	adolescent exposure	Han	73	male	Middle school or high school	2	Married/cohabiting	<20000	Don't smoke	Yes	Not overweight	75	84	Yes	No
0	0	0	0	0	0	1	childhood exposure	Han	63	male	Middle school or high school	2	Married/cohabiting	20000~99999	Don't smoke	Yes	Not overweight	78.3	90.5	Yes	No
0	0	0	0	0	0	1	childhood exposure	Han	61	male	Middle school or high school	2	Married/cohabiting	20000~99999	Don't smoke	Yes	Not overweight	76.5	86	Yes	No
2	0	0	0	0	2	1	non-exposed	Han	48	male	Middle school or high school	2	Married/cohabiting	20000~99999	Don't smoke	Yes	Not overweight	94	100	Yes	No
1	0	0	0	0	1	1	non-exposed	Han	51	male	University and above	2	Married/cohabiting	>1000000	Don't smoke	Yes	Not overweight	83.2	91.7	No	No
0	0	0	0	0	0	1	adolescent exposure	Han	74	male	Middle school or high school	3	Married/cohabiting	<20000	Don't smoke	Yes	Not overweight	83	83.7	Yes	No
0	0	0	0	0	0	1	non-exposed	Han	50	male	University and above	3	Married/cohabiting	>1000000	Don't smoke	Yes	Not overweight	81	89.5	Yes	No
0	0	0	0	0	0	1	non-exposed	Han	56	male	Middle school or high school	1	Widowed spouse	<20000	Don't smoke	Yes	Not overweight	77	92	No	No
0	0	1	0	0	1	1	non-exposed	Han	50	male	Primary school and below	1	Married/cohabiting	<20000	Don't smoke	Yes	Overweight	77.5	91.2	No	No
0	0	0	0	0	0	1	non-exposed	Han	48	male	Primary school and below	1	Married/cohabiting	20000~99999	Don't smoke	Yes	Overweight	87	93	No	No
2	0	1	0	0	3	0	non-exposed	Han	47	male	Primary school and below	1	Married/cohabiting	20000~99999	Don't smoke	Yes	Overweight	94.2	98	No	No
0	0	0	0	0	0	1	childhood exposure	Han	67	male	Middle school or high school	1	Married/cohabiting	20000~99999	Don't smoke	Yes	Overweight	80	88	Yes	Yes
0	0	0	0	0	0	1	fetal exposure	Han	59	male	Middle school or high school	1	Married/cohabiting	20000~99999	Don't smoke	Yes	Overweight	84.5	93	No	Yes
0	0	0	0	0	0	1	non-exposed	Han	54	male	Middle school or high school	1	Married/cohabiting	20000~99999	Don't smoke	Yes	Overweight	86	93.5	Yes	Yes
2	0	0	0	0	2	1	non-exposed	Han	46	male	Middle school or high school	1	Married/cohabiting	20000~99999	Don't smoke	Yes	Overweight	93	100.5	No	Yes
0	0	1	0	0	1	1	non-exposed	Han	48	male	Middle school or high school	2	Married/cohabiting	<20000	Don't smoke	Yes	Overweight	77	89	No	No
0	0	0	0	0	0	1	adolescent exposure	Han	70	male	Middle school or high school	2	Married/cohabiting	20000~99999	Don't smoke	Yes	Overweight	94	103	Yes	No
0	0	0	0	0	0	1	non-exposed	Han	56	male	Middle school or high school	2	Married/cohabiting	20000~99999	Don't smoke	Yes	Overweight	76	92	No	Yes
1	0	1	0	0	2	1	non-exposed	Han	54	male	University and above	2	Married/cohabiting	20000~99999	Don't smoke	Yes	Overweight	102	102	Yes	Yes
0	0	1	0	0	1	1	childhood exposure	Han	68	male	Middle school or high school	3	Married/cohabiting	20000~99999	Don't smoke	Yes	Overweight	79.5	89.5	No	No
0	0	0	0	0	0	1	non-exposed	Han	54	male	Primary school and below	1	Widowed spouse	20000~99999	Don't smoke	Yes	Overweight	94	98	No	Yes
1	0	1	0	0	2	1	non-exposed	Han	42	male	Middle school or high school	1	Married/cohabiting	<20000	Don't smoke	Yes	Not overweight	77.5	88	No	No
0	0	0	0	0	0	1	adolescent exposure	Han	72	male	Primary school and below	1	Married/cohabiting	20000~99999	Don't smoke	Yes	Not overweight	80	89	Yes	Yes
1	0	4	1	0	5	0	childhood exposure	Han	65	male	Primary school and below	1	Married/cohabiting	20000~99999	Don't smoke	Yes	Not overweight	72	88.5	No	Yes
1	0	0	0	0	1	1	non-exposed	Han	42	male	Primary school and below	1	Married/cohabiting	20000~99999	Don't smoke	Yes	Not overweight	66.5	80.5	No	No
0	0	2	0	0	2	1	non-exposed	Han	42	male	Middle school or high school	1	Married/cohabiting	20000~99999	Don't smoke	Yes	Not overweight	84	87	No	Yes
0	0	0	0	0	0	1	childhood exposure	Han	67	male	Middle school or high school	2	Married/cohabiting	<20000	Don't smoke	Yes	Not overweight	81.2	89.5	No	Yes
1	0	0	0	0	1	1	childhood exposure	Han	65	male	Primary school and below	2	Married/cohabiting	20000~99999	Don't smoke	Yes	Not overweight	80	86	No	Yes
1	0	0	0	0	1	1	childhood exposure	Han	68	male	Middle school or high school	2	Married/cohabiting	20000~99999	Don't smoke	Yes	Not overweight	78.5	91	No	Yes
2	0	1	0	0	3	0	non-exposed	Han	46	male	Middle school or high school	1	Never married	<20000	Don't smoke	Yes	Not overweight	78.5	88.5	No	No
1	0	3	1	0	4	0	adolescent exposure	Han	75	male	Primary school and below	1	Married/cohabiting	<20000	Don't smoke	Yes	Overweight	83	92	Yes	No
0	0	1	0	0	1	1	adolescent exposure	Han	70	male	Primary school and below	1	Married/cohabiting	<20000	Don't smoke	Yes	Overweight	91	98.9	Yes	No
0	0	0	0	0	0	1	childhood exposure	Han	69	male	Primary school and below	1	Married/cohabiting	<20000	Don't smoke	Yes	Overweight	75	89	No	No
2	0	2	0	0	4	0	childhood exposure	Han	69	male	Primary school and below	1	Married/cohabiting	<20000	Don't smoke	Yes	Overweight	91.5	97	Yes	No
0	0	0	0	0	0	1	childhood exposure	Han	67	male	Primary school and below	1	Married/cohabiting	<20000	Don't smoke	Yes	Overweight	91	94	Yes	No
0	0	0	0	0	0	1	childhood exposure	Han	64	male	Primary school and below	1	Married/cohabiting	<20000	Don't smoke	Yes	Overweight	85	89	No	No
0	0	0	0	0	0	1	childhood exposure	Han	61	male	Primary school and below	1	Married/cohabiting	<20000	Don't smoke	Yes	Overweight	87	94.5	Yes	No
2	0	0	0	0	2	1	fetal exposure	Han	59	male	Primary school and below	1	Married/cohabiting	<20000	Don't smoke	Yes	Overweight	75	85	No	No
0	0	0	0	0	0	1	non-exposed	Han	56	male	Primary school and below	1	Married/cohabiting	<20000	Don't smoke	Yes	Overweight	78	93	No	No
0	0	0	0	0	0	1	non-exposed	Han	54	male	Primary school and below	1	Married/cohabiting	<20000	Don't smoke	Yes	Overweight	76	86	No	No
0	0	0	0	0	0	1	non-exposed	Han	54	male	Primary school and below	1	Married/cohabiting	<20000	Don't smoke	Yes	Overweight	80	90	No	No
0	0	0	0	0	0	1	non-exposed	Han	54	male	Primary school and below	1	Married/cohabiting	<20000	Don't smoke	Yes	Overweight	85	86	No	No
0	0	1	0	0	1	1	non-exposed	Han	53	male	Primary school and below	1	Married/cohabiting	<20000	Don't smoke	Yes	Overweight	80.3	88.6	No	No
0	0	1	0	0	1	1	non-exposed	Han	52	male	Primary school and below	1	Married/cohabiting	<20000	Don't smoke	Yes	Overweight	78	87	No	No
0	0	1	0	0	1	1	non-exposed	Han	52	male	Primary school and below	1	Married/cohabiting	<20000	Don't smoke	Yes	Overweight	84	90	No	No
0	0	0	0	0	0	1	non-exposed	Han	51	male	Primary school and below	1	Married/cohabiting	<20000	Don't smoke	Yes	Overweight	79.5	90.8	No	No
1	0	1	0	0	2	1	non-exposed	Han	51	male	Primary school and below	1	Married/cohabiting	<20000	Don't smoke	Yes	Overweight	76	89	No	No
0	0	0	0	0	0	1	non-exposed	Han	50	male	Primary school and below	1	Married/cohabiting	<20000	Don't smoke	Yes	Overweight	83	96	No	No
2	0	2	0	0	4	0	non-exposed	Han	50	male	Primary school and below	1	Married/cohabiting	<20000	Don't smoke	Yes	Overweight	81.2	88.5	No	No
0	0	0	0	0	0	1	non-exposed	Han	49	male	Primary school and below	1	Married/cohabiting	<20000	Don't smoke	Yes	Overweight	87	92	No	No
2	0	1	0	0	3	0	non-exposed	Han	49	male	Primary school and below	1	Married/cohabiting	<20000	Don't smoke	Yes	Overweight	81.5	96	No	No
0	0	0	0	0	0	1	non-exposed	Han	49	male	Primary school and below	1	Married/cohabiting	<20000	Don't smoke	Yes	Overweight	90	97	No	No
0	0	0	0	0	0	1	non-exposed	Han	47	male	Primary school and below	1	Married/cohabiting	<20000	Don't smoke	Yes	Overweight	89	100.5	No	No
0	0	2	0	0	2	1	non-exposed	Han	47	male	Primary school and below	1	Married/cohabiting	<20000	Don't smoke	Yes	Overweight	83	86.5	No	No
1	0	3	1	0	4	0	non-exposed	Han	47	male	Primary school and below	1	Married/cohabiting	<20000	Don't smoke	Yes	Overweight	99	100	No	No
2	0	1	0	0	3	0	childhood exposure	Han	65	male	Middle school or high school	1	Married/cohabiting	<20000	Don't smoke	Yes	Overweight	80.5	94.5	Yes	No
0	0	0	0	0	0	1	childhood exposure	Han	62	male	Middle school or high school	1	Married/cohabiting	<20000	Don't smoke	Yes	Overweight	88	94.5	No	No
0	0	0	0	0	0	1	childhood exposure	Han	61	male	Middle school or high school	1	Married/cohabiting	<20000	Don't smoke	Yes	Overweight	78	90	No	No
0	0	0	0	0	0	1	non-exposed	Han	56	male	Middle school or high school	1	Married/cohabiting	<20000	Don't smoke	Yes	Overweight	90	97	Yes	No
2	0	3	1	0	5	0	non-exposed	Han	56	male	Middle school or high school	1	Married/cohabiting	<20000	Don't smoke	Yes	Overweight	75	89	No	No
0	0	0	0	0	0	1	non-exposed	Han	55	male	Middle school or high school	1	Married/cohabiting	<20000	Don't smoke	Yes	Overweight	91	100	No	No
0	0	0	0	0	0	1	non-exposed	Han	54	male	Middle school or high school	1	Married/cohabiting	<20000	Don't smoke	Yes	Overweight	84	95	No	No
0	0	0	0	0	0	1	non-exposed	Han	53	male	Middle school or high school	1	Married/cohabiting	<20000	Don't smoke	Yes	Overweight	90.5	97.7	No	No
0	0	1	0	0	1	1	non-exposed	Han	51	male	Middle school or high school	1	Married/cohabiting	<20000	Don't smoke	Yes	Overweight	92.5	98	No	No
0	0	0	0	0	0	1	non-exposed	Han	50	male	Middle school or high school	1	Married/cohabiting	<20000	Don't smoke	Yes	Overweight	90.5	99	No	No
0	0	0	0	0	0	1	non-exposed	Han	49	male	Middle school or high school	1	Married/cohabiting	<20000	Don't smoke	Yes	Overweight	79	94	No	No
0	0	0	0	0	0	1	non-exposed	Han	46	male	Middle school or high school	1	Married/cohabiting	<20000	Don't smoke	Yes	Overweight	92	97	No	No
1	0	0	0	0	1	1	non-exposed	Han	46	male	Middle school or high school	1	Married/cohabiting	<20000	Don't smoke	Yes	Overweight	87	94	No	No
2	0	0	0	0	2	1	non-exposed	Han	46	male	Middle school or high school	1	Married/cohabiting	<20000	Don't smoke	Yes	Overweight	103	105.5	No	No
1	0	0	0	0	1	1	non-exposed	Han	42	male	Middle school or high school	1	Married/cohabiting	<20000	Don't smoke	Yes	Overweight	81	95	No	No
0	0	0	0	0	0	1	non-exposed	Han	42	male	Middle school or high school	1	Married/cohabiting	<20000	Don't smoke	Yes	Overweight	81	86	Yes	No
0	0	0	0	0	0	1	non-exposed	Han	41	male	Middle school or high school	1	Married/cohabiting	<20000	Don't smoke	Yes	Overweight	83.7	89.8	No	No
2	0	1	0	0	3	0	non-exposed	Han	41	male	Middle school or high school	1	Married/cohabiting	<20000	Don't smoke	Yes	Overweight	76.8	92.5	No	No
0	0	0	0	0	0	1	non-exposed	Han	40	male	Middle school or high school	1	Married/cohabiting	<20000	Don't smoke	Yes	Overweight	81.7	92.3	No	No
0	0	0	0	0	0	1	childhood exposure	Han	62	male	Primary school and below	1	Married/cohabiting	20000~99999	Don't smoke	Yes	Overweight	87	96.5	No	No
0	0	0	0	0	0	1	childhood exposure	Han	62	male	Primary school and below	1	Married/cohabiting	20000~99999	Don't smoke	Yes	Overweight	74	90	No	No
1	0	0	0	0	1	1	childhood exposure	Han	60	male	Primary school and below	1	Married/cohabiting	20000~99999	Don't smoke	Yes	Overweight	80	91	No	No
2	0	2	0	0	4	0	non-exposed	Han	56	male	Primary school and below	1	Married/cohabiting	20000~99999	Don't smoke	Yes	Overweight	81	93	No	No
0	0	0	0	0	0	1	non-exposed	Han	56	male	Primary school and below	1	Married/cohabiting	20000~99999	Don't smoke	Yes	Overweight	92	95	No	No
0	0	0	0	0	0	1	non-exposed	Han	54	male	Primary school and below	1	Married/cohabiting	20000~99999	Don't smoke	Yes	Overweight	80.2	92.7	No	No
0	0	0	0	0	0	1	non-exposed	Han	53	male	Primary school and below	1	Married/cohabiting	20000~99999	Don't smoke	Yes	Overweight	82.8	91.5	No	No
0	0	1	0	0	1	1	non-exposed	Han	53	male	Primary school and below	1	Married/cohabiting	20000~99999	Don't smoke	Yes	Overweight	78	94	No	No
1	0	0	0	0	1	1	non-exposed	Han	52	male	Primary school and below	1	Married/cohabiting	20000~99999	Don't smoke	Yes	Overweight	83	94	No	No
0	0	0	0	0	0	1	non-exposed	Han	51	male	Primary school and below	1	Married/cohabiting	20000~99999	Don't smoke	Yes	Overweight	75	89	No	No
0	0	0	0	0	0	1	non-exposed	Han	51	male	Primary school and below	1	Married/cohabiting	20000~99999	Don't smoke	Yes	Overweight	100	96	No	No
2	0	1	0	0	3	0	non-exposed	Han	51	male	Primary school and below	1	Married/cohabiting	20000~99999	Don't smoke	Yes	Overweight	85	91	No	No
0	0	0	0	0	0	1	non-exposed	Han	51	male	Primary school and below	1	Married/cohabiting	20000~99999	Don't smoke	Yes	Overweight	83	91	No	No
0	0	0	0	0	0	1	non-exposed	Han	50	male	Primary school and below	1	Married/cohabiting	20000~99999	Don't smoke	Yes	Overweight	81	90	No	No
2	0	1	0	0	3	0	non-exposed	Han	50	male	Primary school and below	1	Married/cohabiting	20000~99999	Don't smoke	Yes	Overweight	83	91.5	No	No
0	0	0	0	0	0	1	non-exposed	Han	49	male	Primary school and below	1	Married/cohabiting	20000~99999	Don't smoke	Yes	Overweight	90	102.5	No	No
0	0	0	0	0	0	1	non-exposed	Han	49	male	Primary school and below	1	Married/cohabiting	20000~99999	Don't smoke	Yes	Overweight	77	87.5	No	No
0	0	0	0	0	0	1	non-exposed	Han	48	male	Primary school and below	1	Married/cohabiting	20000~99999	Don't smoke	Yes	Overweight	102	108	Yes	No
0	0	0	0	0	0	1	non-exposed	Han	48	male	Primary school and below	1	Married/cohabiting	20000~99999	Don't smoke	Yes	Overweight	92	95	No	No
2	0	0	0	0	2	1	non-exposed	Han	48	male	Primary school and below	1	Married/cohabiting	20000~99999	Don't smoke	Yes	Overweight	86	91	No	No
2	0	2	0	0	4	0	non-exposed	Han	48	male	Primary school and below	1	Married/cohabiting	20000~99999	Don't smoke	Yes	Overweight	81	90	No	No
1	0	1	0	0	2	1	non-exposed	Han	47	male	Primary school and below	1	Married/cohabiting	20000~99999	Don't smoke	Yes	Overweight	80.2	95.8	Yes	No
1	0	2	0	0	3	0	non-exposed	Han	47	male	Primary school and below	1	Married/cohabiting	20000~99999	Don't smoke	Yes	Overweight	77	87	No	No
0	0	1	0	0	1	1	non-exposed	Han	46	male	Primary school and below	1	Married/cohabiting	20000~99999	Don't smoke	Yes	Overweight	81	90	No	No
0	0	2	0	0	2	1	non-exposed	Han	46	male	Primary school and below	1	Married/cohabiting	20000~99999	Don't smoke	Yes	Overweight	73.5	85	No	No
0	0	0	0	0	0	1	non-exposed	Han	46	male	Primary school and below	1	Married/cohabiting	20000~99999	Don't smoke	Yes	Overweight	82.2	91.4	No	No
0	0	0	0	0	0	1	childhood exposure	Han	62	male	Middle school or high school	1	Married/cohabiting	20000~99999	Don't smoke	Yes	Overweight	94	93	No	No
0	0	0	0	0	0	1	childhood exposure	Han	61	male	Middle school or high school	1	Married/cohabiting	20000~99999	Don't smoke	Yes	Overweight	84	98.5	No	No
0	0	0	0	0	0	1	childhood exposure	Han	61	male	Middle school or high school	1	Married/cohabiting	20000~99999	Don't smoke	Yes	Overweight	98	95	Yes	No
0	0	0	0	0	0	1	fetal exposure	Han	59	male	Middle school or high school	1	Married/cohabiting	20000~99999	Don't smoke	Yes	Overweight	78	89	No	No
5	1	4	1	1	1	1	fetal exposure	Han	58	male	Middle school or high school	1	Married/cohabiting	20000~99999	Don't smoke	Yes	Overweight	95	103	No	No
0	0	1	0	0	1	1	non-exposed	Han	56	male	Middle school or high school	1	Married/cohabiting	20000~99999	Don't smoke	Yes	Overweight	89.5	97	No	No
0	0	0	0	0	0	1	non-exposed	Han	56	male	Middle school or high school	1	Married/cohabiting	20000~99999	Don't smoke	Yes	Overweight	76	89	No	No
0	0	0	0	0	0	1	non-exposed	Han	56	male	Middle school or high school	1	Married/cohabiting	20000~99999	Don't smoke	Yes	Overweight	85	92	Yes	No
0	0	2	0	0	2	1	non-exposed	Han	55	male	Middle school or high school	1	Married/cohabiting	20000~99999	Don't smoke	Yes	Overweight	85	90	No	No
0	0	0	0	0	0	1	non-exposed	Han	54	male	Middle school or high school	1	Married/cohabiting	20000~99999	Don't smoke	Yes	Overweight	80	89.7	No	No
0	0	0	0	0	0	1	non-exposed	Han	54	male	Middle school or high school	1	Married/cohabiting	20000~99999	Don't smoke	Yes	Overweight	94	95.5	No	No
1	0	0	0	0	1	1	non-exposed	Han	54	male	Middle school or high school	1	Married/cohabiting	20000~99999	Don't smoke	Yes	Overweight	80	90	No	No
0	0	0	0	0	0	1	non-exposed	Han	54	male	Middle school or high school	1	Married/cohabiting	20000~99999	Don't smoke	Yes	Overweight	87	93	No	No
2	0	2	0	0	4	0	non-exposed	Han	54	male	Middle school or high school	1	Married/cohabiting	20000~99999	Don't smoke	Yes	Overweight	103	100.4	No	No
2	0	3	1	0	5	0	non-exposed	Han	54	male	Middle school or high school	1	Married/cohabiting	20000~99999	Don't smoke	Yes	Overweight	88	95.5	No	No
0	0	0	0	0	0	1	non-exposed	Han	53	male	Middle school or high school	1	Married/cohabiting	20000~99999	Don't smoke	Yes	Overweight	81.3	92.5	No	No
1	0	1	0	0	2	1	non-exposed	Han	53	male	Middle school or high school	1	Married/cohabiting	20000~99999	Don't smoke	Yes	Overweight	91.5	96.8	Yes	No
2	0	2	0	0	4	0	non-exposed	Han	52	male	Middle school or high school	1	Married/cohabiting	20000~99999	Don't smoke	Yes	Overweight	73	86	No	No
0	0	0	0	0	0	1	non-exposed	Han	51	male	Middle school or high school	1	Married/cohabiting	20000~99999	Don't smoke	Yes	Overweight	87	93.5	Yes	No
0	0	1	0	0	1	1	non-exposed	Han	50	male	Middle school or high school	1	Married/cohabiting	20000~99999	Don't smoke	Yes	Overweight	83.5	88	No	No
0	0	1	0	0	1	1	non-exposed	Han	50	male	Middle school or high school	1	Married/cohabiting	20000~99999	Don't smoke	Yes	Overweight	81.5	97	Yes	No
1	0	1	0	0	2	1	non-exposed	Han	50	male	Middle school or high school	1	Married/cohabiting	20000~99999	Don't smoke	Yes	Overweight	78	82	No	No
0	0	0	0	0	0	1	non-exposed	Han	48	male	Middle school or high school	1	Married/cohabiting	20000~99999	Don't smoke	Yes	Overweight	80	89	No	No
0	0	0	0	0	0	1	non-exposed	Han	47	male	Middle school or high school	1	Married/cohabiting	20000~99999	Don't smoke	Yes	Overweight	86.4	93.2	No	No
0	0	1	0	0	1	1	non-exposed	Han	46	male	Middle school or high school	1	Married/cohabiting	20000~99999	Don't smoke	Yes	Overweight	77	87.5	No	No
0	0	0	0	0	0	1	non-exposed	Han	46	male	Middle school or high school	1	Married/cohabiting	20000~99999	Don't smoke	Yes	Overweight	85	97.5	No	No
0	0	0	0	0	0	1	non-exposed	Han	46	male	Middle school or high school	1	Married/cohabiting	20000~99999	Don't smoke	Yes	Overweight	106	107	No	No
0	0	0	0	0	0	1	non-exposed	Han	46	male	Middle school or high school	1	Married/cohabiting	20000~99999	Don't smoke	Yes	Overweight	82	92	No	No
0	0	0	0	0	0	1	non-exposed	Han	45	male	Middle school or high school	1	Married/cohabiting	20000~99999	Don't smoke	Yes	Overweight	81	88	No	No
0	0	0	0	0	0	1	non-exposed	Han	45	male	Middle school or high school	1	Married/cohabiting	20000~99999	Don't smoke	Yes	Overweight	67	89	No	No
2	0	2	0	0	4	0	non-exposed	Han	45	male	Middle school or high school	1	Married/cohabiting	20000~99999	Don't smoke	Yes	Overweight	89.4	94.5	No	No
2	0	3	1	0	5	0	non-exposed	Han	44	male	Middle school or high school	1	Married/cohabiting	20000~99999	Don't smoke	Yes	Overweight	89.2	95.5	No	No
2	0	1	0	0	3	0	non-exposed	Han	43	male	Middle school or high school	1	Married/cohabiting	20000~99999	Don't smoke	Yes	Overweight	80	92	No	No
0	0	0	0	0	0	1	non-exposed	Han	43	male	Middle school or high school	1	Married/cohabiting	20000~99999	Don't smoke	Yes	Overweight	78	87	No	No
0	0	0	0	0	0	1	non-exposed	Han	43	male	Middle school or high school	1	Married/cohabiting	20000~99999	Don't smoke	Yes	Overweight	85	94	No	No
1	0	0	0	0	1	1	non-exposed	Han	43	male	Middle school or high school	1	Married/cohabiting	20000~99999	Don't smoke	Yes	Overweight	80.3	93.1	No	No
0	0	0	0	0	0	1	non-exposed	Han	42	male	Middle school or high school	1	Married/cohabiting	20000~99999	Don't smoke	Yes	Overweight	81	93	No	No
0	0	0	0	0	0	1	non-exposed	Han	42	male	Middle school or high school	1	Married/cohabiting	20000~99999	Don't smoke	Yes	Overweight	88	95	No	No
1	0	1	0	0	2	1	non-exposed	Han	41	male	Middle school or high school	1	Married/cohabiting	20000~99999	Don't smoke	Yes	Overweight	89	96	No	No
2	0	1	0	0	3	0	non-exposed	Han	41	male	Middle school or high school	1	Married/cohabiting	20000~99999	Don't smoke	Yes	Overweight	85	91	No	No
0	0	0	0	0	0	1	non-exposed	Han	41	male	Middle school or high school	1	Married/cohabiting	20000~99999	Don't smoke	Yes	Overweight	81	94	No	No
0	0	0	0	0	0	1	fetal exposure	Han	59	male	Primary school and below	1	Married/cohabiting	>1000000	Don't smoke	Yes	Overweight	81	90.6	No	No
0	0	0	0	0	0	1	non-exposed	Han	41	male	Primary school and below	1	Married/cohabiting	>1000000	Don't smoke	Yes	Overweight	88	96	No	No
0	0	0	0	0	0	1	non-exposed	Han	56	male	Middle school or high school	1	Married/cohabiting	>1000000	Don't smoke	Yes	Overweight	88	91	No	No
1	0	0	0	0	1	1	non-exposed	Han	53	male	Middle school or high school	1	Married/cohabiting	>1000000	Don't smoke	Yes	Overweight	82.5	93	No	No
0	0	0	0	0	0	1	childhood exposure	Han	65	male	Primary school and below	2	Married/cohabiting	<20000	Don't smoke	Yes	Overweight	87	91	Yes	No
0	0	0	0	0	0	1	non-exposed	Han	53	male	University and above	2	Married/cohabiting	<20000	Don't smoke	Yes	Overweight	72	97	No	No
2	0	0	0	0	2	1	non-exposed	Han	48	male	Primary school and below	2	Married/cohabiting	20000~99999	Don't smoke	Yes	Overweight	95.5	94.5	No	No
2	0	2	0	0	4	0	adolescent exposure	Han	70	male	Middle school or high school	2	Married/cohabiting	20000~99999	Don't smoke	Yes	Overweight	87	91.5	No	No
0	0	0	0	0	0	1	childhood exposure	Han	66	male	Middle school or high school	2	Married/cohabiting	20000~99999	Don't smoke	Yes	Overweight	83.6	92	No	No
1	0	0	0	0	1	1	childhood exposure	Han	65	male	Middle school or high school	2	Married/cohabiting	20000~99999	Don't smoke	Yes	Overweight	90	97	Yes	No
0	0	0	0	0	0	1	childhood exposure	Han	64	male	Middle school or high school	2	Married/cohabiting	20000~99999	Don't smoke	Yes	Overweight	78	87	No	No
0	0	0	0	0	0	1	non-exposed	Han	48	male	Middle school or high school	2	Married/cohabiting	20000~99999	Don't smoke	Yes	Overweight	79	96	No	No
0	0	0	0	0	0	1	non-exposed	Han	53	male	University and above	2	Married/cohabiting	20000~99999	Don't smoke	Yes	Overweight	76	86	No	No
2	0	0	0	0	2	1	non-exposed	Han	53	male	University and above	2	Married/cohabiting	20000~99999	Don't smoke	Yes	Overweight	85	90.5	No	No
1	0	0	0	0	1	1	non-exposed	Han	51	male	University and above	2	Married/cohabiting	20000~99999	Don't smoke	Yes	Overweight	83	92.5	No	No
2	0	2	0	0	4	0	non-exposed	Han	51	male	University and above	2	Married/cohabiting	20000~99999	Don't smoke	Yes	Overweight	89.9	97.5	No	No
1	0	1	0	0	2	1	non-exposed	Han	45	male	University and above	2	Married/cohabiting	20000~99999	Don't smoke	Yes	Overweight	84	93	Yes	No
0	0	0	0	0	0	1	non-exposed	Han	42	male	University and above	2	Married/cohabiting	20000~99999	Don't smoke	Yes	Overweight	93	101.7	No	No
0	0	0	0	0	0	1	childhood exposure	Han	64	male	Middle school or high school	2	Married/cohabiting	>1000000	Don't smoke	Yes	Overweight	94	103	No	No
0	0	0	0	0	0	1	fetal exposure	Han	58	male	Middle school or high school	2	Married/cohabiting	>1000000	Don't smoke	Yes	Overweight	92	93.3	No	No
0	0	0	0	0	0	1	non-exposed	Han	55	male	Middle school or high school	2	Married/cohabiting	>1000000	Don't smoke	Yes	Overweight	89	97.5	No	No
0	0	0	0	0	0	1	non-exposed	Han	56	male	University and above	2	Married/cohabiting	>1000000	Don't smoke	Yes	Overweight	92.3	91.2	Yes	No
0	0	0	0	0	0	1	non-exposed	Han	51	male	University and above	2	Married/cohabiting	>1000000	Don't smoke	Yes	Overweight	61	100	No	No
2	0	2	0	0	4	0	non-exposed	Han	51	male	University and above	2	Married/cohabiting	>1000000	Don't smoke	Yes	Overweight	82.6	92	No	No
0	0	0	0	0	0	1	non-exposed	Han	50	male	University and above	2	Married/cohabiting	>1000000	Don't smoke	Yes	Overweight	82	94	No	No
1	0	1	0	0	2	1	non-exposed	Han	49	male	University and above	2	Married/cohabiting	>1000000	Don't smoke	Yes	Overweight	82.5	92	No	No
0	0	0	0	0	0	1	non-exposed	Han	48	male	University and above	2	Married/cohabiting	>1000000	Don't smoke	Yes	Overweight	89.9	89	No	No
0	0	2	0	0	2	1	non-exposed	Han	46	male	University and above	2	Married/cohabiting	>1000000	Don't smoke	Yes	Overweight	93	100	No	No
0	0	0	0	0	0	1	non-exposed	Han	46	male	University and above	2	Married/cohabiting	>1000000	Don't smoke	Yes	Overweight	90	97	Yes	No
0	0	0	0	0	0	1	non-exposed	Han	43	male	University and above	2	Married/cohabiting	>1000000	Don't smoke	Yes	Overweight	90.5	94	No	No
0	0	0	0	0	0	1	non-exposed	Han	42	male	University and above	2	Married/cohabiting	>1000000	Don't smoke	Yes	Overweight	78.5	91	No	No
0	0	0	0	0	0	1	non-exposed	Han	41	male	University and above	2	Married/cohabiting	>1000000	Don't smoke	Yes	Overweight	76.8	103.8	No	No
1	0	0	0	0	1	1	adolescent exposure	Han	70	male	Primary school and below	3	Married/cohabiting	20000~99999	Don't smoke	Yes	Overweight	73.5	86.5	Yes	No
1	0	2	0	0	3	0	non-exposed	Han	53	male	Middle school or high school	3	Married/cohabiting	20000~99999	Don't smoke	Yes	Overweight	93	100	No	No
4	1	6	1	1	10	0	non-exposed	Han	45	male	Middle school or high school	3	Married/cohabiting	20000~99999	Don't smoke	Yes	Overweight	86	92	No	No
0	0	0	0	0	0	1	non-exposed	Han	47	male	University and above	3	Married/cohabiting	20000~99999	Don't smoke	Yes	Overweight	90	100	No	No
0	0	0	0	0	0	1	childhood exposure	Han	66	male	Middle school or high school	2	Separated/divorced	20000~99999	Don't smoke	Yes	Overweight	93	94	No	No
2	0	2	0	0	4	0	adolescent exposure	Han	75	male	Primary school and below	1	Married/cohabiting	<20000	Don't smoke	Yes	Not overweight	82	93	No	No
1	0	0	0	0	1	1	adolescent exposure	Han	72	male	Primary school and below	1	Married/cohabiting	<20000	Don't smoke	Yes	Not overweight	75	92	No	No
2	0	2	0	0	4	0	adolescent exposure	Han	70	male	Primary school and below	1	Married/cohabiting	<20000	Don't smoke	Yes	Not overweight	86.3	88	No	No
0	0	1	0	0	1	1	adolescent exposure	Han	70	male	Primary school and below	1	Married/cohabiting	<20000	Don't smoke	Yes	Not overweight	68	79	No	No
0	0	1	0	0	1	1	childhood exposure	Han	68	male	Primary school and below	1	Married/cohabiting	<20000	Don't smoke	Yes	Not overweight	68	88	No	No
2	0	1	0	0	3	0	childhood exposure	Han	66	male	Primary school and below	1	Married/cohabiting	<20000	Don't smoke	Yes	Not overweight	75	86	No	No
0	0	0	0	0	0	1	childhood exposure	Han	66	male	Primary school and below	1	Married/cohabiting	<20000	Don't smoke	Yes	Not overweight	72.5	88.5	No	No
1	0	3	1	0	4	0	childhood exposure	Han	66	male	Primary school and below	1	Married/cohabiting	<20000	Don't smoke	Yes	Not overweight	73.8	82.8	Yes	No
2	0	0	0	0	2	1	childhood exposure	Han	65	male	Primary school and below	1	Married/cohabiting	<20000	Don't smoke	Yes	Not overweight	75	83	No	No
1	0	1	0	0	2	1	childhood exposure	Han	64	male	Primary school and below	1	Married/cohabiting	<20000	Don't smoke	Yes	Not overweight	71	84.2	No	No
0	0	0	0	0	0	1	childhood exposure	Han	62	male	Primary school and below	1	Married/cohabiting	<20000	Don't smoke	Yes	Not overweight	77	84	No	No
0	0	0	0	0	0	1	childhood exposure	Han	62	male	Primary school and below	1	Married/cohabiting	<20000	Don't smoke	Yes	Not overweight	73	89	No	No
0	0	0	0	0	0	1	childhood exposure	Han	61	male	Primary school and below	1	Married/cohabiting	<20000	Don't smoke	Yes	Not overweight	71	87	No	No
0	0	0	0	0	0	1	non-exposed	Han	56	male	Primary school and below	1	Married/cohabiting	<20000	Don't smoke	Yes	Not overweight	69.4	87.7	No	No
0	0	0	0	0	0	1	non-exposed	Han	55	male	Primary school and below	1	Married/cohabiting	<20000	Don't smoke	Yes	Not overweight	72	85	No	No
2	0	2	0	0	4	0	non-exposed	Han	55	male	Primary school and below	1	Married/cohabiting	<20000	Don't smoke	Yes	Not overweight	68	85	No	No
2	0	2	0	0	4	0	non-exposed	Han	55	male	Primary school and below	1	Married/cohabiting	<20000	Don't smoke	Yes	Not overweight	68	79	No	No
0	0	1	0	0	1	1	non-exposed	Han	53	male	Primary school and below	1	Married/cohabiting	<20000	Don't smoke	Yes	Not overweight	78.4	94.5	No	No
0	0	0	0	0	0	1	non-exposed	Han	51	male	Primary school and below	1	Married/cohabiting	<20000	Don't smoke	Yes	Not overweight	88.5	99	No	No
1	0	1	0	0	2	1	non-exposed	Han	50	male	Primary school and below	1	Married/cohabiting	<20000	Don't smoke	Yes	Not overweight	68.6	90.1	No	No
0	0	0	0	0	0	1	non-exposed	Han	50	male	Primary school and below	1	Married/cohabiting	<20000	Don't smoke	Yes	Not overweight	68.5	85.7	No	No
0	0	0	0	0	0	1	non-exposed	Han	50	male	Primary school and below	1	Married/cohabiting	<20000	Don't smoke	Yes	Not overweight	71	85	No	No
0	0	0	0	0	0	1	non-exposed	Han	50	male	Primary school and below	1	Married/cohabiting	<20000	Don't smoke	Yes	Not overweight	71.5	83.5	No	No
0	0	0	0	0	0	1	non-exposed	Han	49	male	Primary school and below	1	Married/cohabiting	<20000	Don't smoke	Yes	Not overweight	90	97	No	No
1	0	1	0	0	2	1	non-exposed	Han	49	male	Primary school and below	1	Married/cohabiting	<20000	Don't smoke	Yes	Not overweight	82	98	No	No
1	0	0	0	0	1	1	non-exposed	Han	49	male	Primary school and below	1	Married/cohabiting	<20000	Don't smoke	Yes	Not overweight	68	85	No	No
2	0	2	0	0	4	0	non-exposed	Han	49	male	Primary school and below	1	Married/cohabiting	<20000	Don't smoke	Yes	Not overweight	76	85	No	No
4	1	2	0	0	6	0	non-exposed	Han	48	male	Primary school and below	1	Married/cohabiting	<20000	Don't smoke	Yes	Not overweight	79	93	Yes	No
0	0	0	0	0	0	1	non-exposed	Han	48	male	Primary school and below	1	Married/cohabiting	<20000	Don't smoke	Yes	Not overweight	69	83	No	No
2	0	2	0	0	4	0	non-exposed	Han	47	male	Primary school and below	1	Married/cohabiting	<20000	Don't smoke	Yes	Not overweight	73.7	87.2	No	No
2	0	1	0	0	3	0	non-exposed	Han	47	male	Primary school and below	1	Married/cohabiting	<20000	Don't smoke	Yes	Not overweight	68.3	85	No	No
0	0	0	0	0	0	1	non-exposed	Han	46	male	Primary school and below	1	Married/cohabiting	<20000	Don't smoke	Yes	Not overweight	67	87.5	No	No
0	0	2	0	0	2	1	non-exposed	Han	45	male	Primary school and below	1	Married/cohabiting	<20000	Don't smoke	Yes	Not overweight	74	89	No	No
1	0	1	0	0	2	1	non-exposed	Han	45	male	Primary school and below	1	Married/cohabiting	<20000	Don't smoke	Yes	Not overweight	70	82	No	No
1	0	1	0	0	2	1	non-exposed	Han	44	male	Primary school and below	1	Married/cohabiting	<20000	Don't smoke	Yes	Not overweight	76.5	90	No	No
0	0	0	0	0	0	1	non-exposed	Han	43	male	Primary school and below	1	Married/cohabiting	<20000	Don't smoke	Yes	Not overweight	72	87.5	No	No
0	0	0	0	0	0	1	childhood exposure	Han	65	male	Middle school or high school	1	Married/cohabiting	<20000	Don't smoke	Yes	Not overweight	70	82	Yes	No
1	0	0	0	0	1	1	childhood exposure	Han	63	male	Middle school or high school	1	Married/cohabiting	<20000	Don't smoke	Yes	Not overweight	67.5	82	No	No
0	0	0	0	0	0	1	childhood exposure	Han	63	male	Middle school or high school	1	Married/cohabiting	<20000	Don't smoke	Yes	Not overweight	71	85	No	No
0	0	0	0	0	0	1	childhood exposure	Han	62	male	Middle school or high school	1	Married/cohabiting	<20000	Don't smoke	Yes	Not overweight	67	87.5	No	No
0	0	0	0	0	0	1	non-exposed	Han	52	male	Middle school or high school	1	Married/cohabiting	<20000	Don't smoke	Yes	Not overweight	68	89	No	No
0	0	0	0	0	0	1	non-exposed	Han	52	male	Middle school or high school	1	Married/cohabiting	<20000	Don't smoke	Yes	Not overweight	65	79.6	No	No
1	0	1	0	0	2	1	non-exposed	Han	52	male	Middle school or high school	1	Married/cohabiting	<20000	Don't smoke	Yes	Not overweight	67.7	86.3	No	No
1	0	2	0	0	3	0	non-exposed	Han	50	male	Middle school or high school	1	Married/cohabiting	<20000	Don't smoke	Yes	Not overweight	65	82.5	No	No
0	0	0	0	0	0	1	non-exposed	Han	47	male	Middle school or high school	1	Married/cohabiting	<20000	Don't smoke	Yes	Not overweight	70.2	83.3	No	No
0	0	0	0	0	0	1	non-exposed	Han	42	male	Middle school or high school	1	Married/cohabiting	<20000	Don't smoke	Yes	Not overweight	71	85	No	No
0	0	0	0	0	0	1	childhood exposure	Han	68	male	Primary school and below	1	Married/cohabiting	20000~99999	Don't smoke	Yes	Not overweight	75	89	No	No
0	0	0	0	0	0	1	childhood exposure	Han	68	male	Primary school and below	1	Married/cohabiting	20000~99999	Don't smoke	Yes	Not overweight	64.5	87	No	No
0	0	0	0	0	0	1	childhood exposure	Han	67	male	Primary school and below	1	Married/cohabiting	20000~99999	Don't smoke	Yes	Not overweight	74	87	Yes	No
2	0	0	0	0	2	1	childhood exposure	Han	65	male	Primary school and below	1	Married/cohabiting	20000~99999	Don't smoke	Yes	Not overweight	70.5	82.5	No	No
0	0	0	0	0	0	1	childhood exposure	Han	61	male	Primary school and below	1	Married/cohabiting	20000~99999	Don't smoke	Yes	Not overweight	74	84	No	No
2	0	1	0	0	3	0	childhood exposure	Han	61	male	Primary school and below	1	Married/cohabiting	20000~99999	Don't smoke	Yes	Not overweight	81	86.5	Yes	No
2	0	2	0	0	4	0	non-exposed	Han	56	male	Primary school and below	1	Married/cohabiting	20000~99999	Don't smoke	Yes	Not overweight	74	89	No	No
0	0	1	0	0	1	1	non-exposed	Han	56	male	Primary school and below	1	Married/cohabiting	20000~99999	Don't smoke	Yes	Not overweight	74	84.3	No	No
1	0	0	0	0	1	1	non-exposed	Han	55	male	Primary school and below	1	Married/cohabiting	20000~99999	Don't smoke	Yes	Not overweight	79	88.5	No	No
2	0	2	0	0	4	0	non-exposed	Han	54	male	Primary school and below	1	Married/cohabiting	20000~99999	Don't smoke	Yes	Not overweight	67	73.5	No	No
0	0	0	0	0	0	1	non-exposed	Han	52	male	Primary school and below	1	Married/cohabiting	20000~99999	Don't smoke	Yes	Not overweight	71	88	No	No
0	0	0	0	0	0	1	non-exposed	Han	52	male	Primary school and below	1	Married/cohabiting	20000~99999	Don't smoke	Yes	Not overweight	68	87.5	No	No
3	1	2	0	0	5	0	non-exposed	Han	52	male	Primary school and below	1	Married/cohabiting	20000~99999	Don't smoke	Yes	Not overweight	74.5	88.5	No	No
0	0	0	0	0	0	1	non-exposed	Han	52	male	Primary school and below	1	Married/cohabiting	20000~99999	Don't smoke	Yes	Not overweight	76.4	79.3	No	No
4	1	3	1	1	7	0	non-exposed	Han	52	male	Primary school and below	1	Married/cohabiting	20000~99999	Don't smoke	Yes	Not overweight	71	85.5	No	No
0	0	0	0	0	0	1	non-exposed	Han	50	male	Primary school and below	1	Married/cohabiting	20000~99999	Don't smoke	Yes	Not overweight	75	80.7	No	No
1	0	1	0	0	2	1	non-exposed	Han	50	male	Primary school and below	1	Married/cohabiting	20000~99999	Don't smoke	Yes	Not overweight	76	87	No	No
2	0	1	0	0	3	0	non-exposed	Han	50	male	Primary school and below	1	Married/cohabiting	20000~99999	Don't smoke	Yes	Not overweight	67	84	No	No
0	0	0	0	0	0	1	non-exposed	Han	50	male	Primary school and below	1	Married/cohabiting	20000~99999	Don't smoke	Yes	Not overweight	64	81	No	No
0	0	0	0	0	0	1	non-exposed	Han	49	male	Primary school and below	1	Married/cohabiting	20000~99999	Don't smoke	Yes	Not overweight	68.2	84.7	No	No
0	0	0	0	0	0	1	non-exposed	Han	49	male	Primary school and below	1	Married/cohabiting	20000~99999	Don't smoke	Yes	Not overweight	67	85	No	No
0	0	0	0	0	0	1	non-exposed	Han	48	male	Primary school and below	1	Married/cohabiting	20000~99999	Don't smoke	Yes	Not overweight	65	80	No	No
2	0	2	0	0	4	0	non-exposed	Han	47	male	Primary school and below	1	Married/cohabiting	20000~99999	Don't smoke	Yes	Not overweight	74.5	84.5	No	No
0	0	0	0	0	0	1	non-exposed	Han	47	male	Primary school and below	1	Married/cohabiting	20000~99999	Don't smoke	Yes	Not overweight	71	85.5	No	No
0	0	1	0	0	1	1	non-exposed	Han	47	male	Primary school and below	1	Married/cohabiting	20000~99999	Don't smoke	Yes	Not overweight	70	88	No	No
1	0	2	0	0	3	0	non-exposed	Han	46	male	Primary school and below	1	Married/cohabiting	20000~99999	Don't smoke	Yes	Not overweight	79	89	No	No
2	0	2	0	0	4	0	non-exposed	Han	45	male	Primary school and below	1	Married/cohabiting	20000~99999	Don't smoke	Yes	Not overweight	70	83	No	No
0	0	0	0	0	0	1	non-exposed	Han	45	male	Primary school and below	1	Married/cohabiting	20000~99999	Don't smoke	Yes	Not overweight	72	88	No	No
0	0	0	0	0	0	1	non-exposed	Han	45	male	Primary school and below	1	Married/cohabiting	20000~99999	Don't smoke	Yes	Not overweight	73	87	No	No
0	0	1	0	0	1	1	non-exposed	Han	44	male	Primary school and below	1	Married/cohabiting	20000~99999	Don't smoke	Yes	Not overweight	77	89	No	No
0	0	0	0	0	0	1	non-exposed	Han	41	male	Primary school and below	1	Married/cohabiting	20000~99999	Don't smoke	Yes	Not overweight	66.5	87.5	No	No
0	0	1	0	0	1	1	non-exposed	Han	41	male	Primary school and below	1	Married/cohabiting	20000~99999	Don't smoke	Yes	Not overweight	70	88	No	No
2	0	1	0	0	3	0	non-exposed	Han	41	male	Primary school and below	1	Married/cohabiting	20000~99999	Don't smoke	Yes	Not overweight	71	86	No	No
0	0	0	0	0	0	1	adolescent exposure	Han	75	male	Middle school or high school	1	Married/cohabiting	20000~99999	Don't smoke	Yes	Not overweight	72	83	No	No
0	0	0	0	0	0	1	childhood exposure	Han	67	male	Middle school or high school	1	Married/cohabiting	20000~99999	Don't smoke	Yes	Not overweight	87	90	No	No
0	0	0	0	0	0	1	childhood exposure	Han	63	male	Middle school or high school	1	Married/cohabiting	20000~99999	Don't smoke	Yes	Not overweight	60	80.5	No	No
0	0	2	0	0	2	1	childhood exposure	Han	63	male	Middle school or high school	1	Married/cohabiting	20000~99999	Don't smoke	Yes	Not overweight	69.5	84	No	No
2	0	0	0	0	2	1	childhood exposure	Han	62	male	Middle school or high school	1	Married/cohabiting	20000~99999	Don't smoke	Yes	Not overweight	81	87.5	No	No
1	0	1	0	0	2	1	fetal exposure	Han	59	male	Middle school or high school	1	Married/cohabiting	20000~99999	Don't smoke	Yes	Not overweight	73.5	87.5	No	No
1	0	0	0	0	0	1	fetal exposure	Han	59	male	Middle school or high school	1	Married/cohabiting	20000~99999	Don't smoke	Yes	Not overweight	69.5	81	No	No
0	0	0	0	0	0	1	fetal exposure	Han	59	male	Middle school or high school	1	Married/cohabiting	20000~99999	Don't smoke	Yes	Not overweight	66	82	No	No
0	0	0	0	0	0	1	fetal exposure	Han	59	male	Middle school or high school	1	Married/cohabiting	20000~99999	Don't smoke	Yes	Not overweight	65	85	No	No
0	0	1	0	0	1	1	fetal exposure	Han	59	male	Middle school or high school	1	Married/cohabiting	20000~99999	Don't smoke	Yes	Not overweight	66	81.1	No	No
2	0	0	0	0	0	1	fetal exposure	Han	58	male	Middle school or high school	1	Married/cohabiting	20000~99999	Don't smoke	Yes	Not overweight	82	88	No	No
0	0	0	0	0	0	1	non-exposed	Han	56	male	Middle school or high school	1	Married/cohabiting	20000~99999	Don't smoke	Yes	Not overweight	78.8	87.4	No	No
0	0	1	0	0	1	1	non-exposed	Han	56	male	Middle school or high school	1	Married/cohabiting	20000~99999	Don't smoke	Yes	Not overweight	65	83	No	No
0	0	1	0	0	1	1	non-exposed	Han	55	male	Middle school or high school	1	Married/cohabiting	20000~99999	Don't smoke	Yes	Not overweight	80	88	No	No
0	0	0	0	0	0	1	non-exposed	Han	54	male	Middle school or high school	1	Married/cohabiting	20000~99999	Don't smoke	Yes	Not overweight	80	86.5	No	No
0	0	1	0	0	1	1	non-exposed	Han	53	male	Middle school or high school	1	Married/cohabiting	20000~99999	Don't smoke	Yes	Not overweight	73.5	88.2	No	No
0	0	0	0	0	0	1	non-exposed	Han	53	male	Middle school or high school	1	Married/cohabiting	20000~99999	Don't smoke	Yes	Not overweight	69	85	No	No
0	0	1	0	0	1	1	non-exposed	Han	53	male	Middle school or high school	1	Married/cohabiting	20000~99999	Don't smoke	Yes	Not overweight	76	92	Yes	No
0	0	0	0	0	0	1	non-exposed	Han	52	male	Middle school or high school	1	Married/cohabiting	20000~99999	Don't smoke	Yes	Not overweight	71	92.5	No	No
0	0	1	0	0	1	1	non-exposed	Han	51	male	Middle school or high school	1	Married/cohabiting	20000~99999	Don't smoke	Yes	Not overweight	69	89	No	No
0	0	0	0	0	0	1	non-exposed	Han	51	male	Middle school or high school	1	Married/cohabiting	20000~99999	Don't smoke	Yes	Not overweight	63	82	No	No
1	0	1	0	0	2	1	non-exposed	Han	50	male	Middle school or high school	1	Married/cohabiting	20000~99999	Don't smoke	Yes	Not overweight	75.4	88	No	No
1	0	0	0	0	1	1	non-exposed	Han	50	male	Middle school or high school	1	Married/cohabiting	20000~99999	Don't smoke	Yes	Not overweight	72	90.5	No	No
1	0	0	0	0	1	1	non-exposed	Han	49	male	Middle school or high school	1	Married/cohabiting	20000~99999	Don't smoke	Yes	Not overweight	75	90	No	No
0	0	0	0	0	0	1	non-exposed	Han	49	male	Middle school or high school	1	Married/cohabiting	20000~99999	Don't smoke	Yes	Not overweight	69	88.3	No	No
0	0	0	0	0	0	1	non-exposed	Han	48	male	Middle school or high school	1	Married/cohabiting	20000~99999	Don't smoke	Yes	Not overweight	67.3	85.7	No	No
1	0	1	0	0	2	1	non-exposed	Han	48	male	Middle school or high school	1	Married/cohabiting	20000~99999	Don't smoke	Yes	Not overweight	66.7	82.8	No	No
0	0	0	0	0	0	1	non-exposed	Han	47	male	Middle school or high school	1	Married/cohabiting	20000~99999	Don't smoke	Yes	Not overweight	74	84	No	No
1	0	0	0	0	1	1	non-exposed	Han	47	male	Middle school or high school	1	Married/cohabiting	20000~99999	Don't smoke	Yes	Not overweight	69	85	No	No
1	0	2	0	0	3	0	non-exposed	Han	47	male	Middle school or high school	1	Married/cohabiting	20000~99999	Don't smoke	Yes	Not overweight	80	88	No	No
0	0	1	0	0	1	1	non-exposed	Han	46	male	Middle school or high school	1	Married/cohabiting	20000~99999	Don't smoke	Yes	Not overweight	62	87.5	No	No
1	0	1	0	0	2	1	non-exposed	Han	46	male	Middle school or high school	1	Married/cohabiting	20000~99999	Don't smoke	Yes	Not overweight	85	88	No	No
0	0	0	0	0	0	1	non-exposed	Han	46	male	Middle school or high school	1	Married/cohabiting	20000~99999	Don't smoke	Yes	Not overweight	71	83	No	No
0	0	0	0	0	0	1	non-exposed	Han	46	male	Middle school or high school	1	Married/cohabiting	20000~99999	Don't smoke	Yes	Not overweight	85	90	No	No
1	0	1	0	0	2	1	non-exposed	Han	46	male	Middle school or high school	1	Married/cohabiting	20000~99999	Don't smoke	Yes	Not overweight	72	88	No	No
0	0	0	0	0	0	1	non-exposed	Han	46	male	Middle school or high school	1	Married/cohabiting	20000~99999	Don't smoke	Yes	Not overweight	84.2	96.4	No	No
0	0	1	0	0	1	1	non-exposed	Han	44	male	Middle school or high school	1	Married/cohabiting	20000~99999	Don't smoke	Yes	Not overweight	75	87	No	No
0	0	1	0	0	1	1	non-exposed	Han	44	male	Middle school or high school	1	Married/cohabiting	20000~99999	Don't smoke	Yes	Not overweight	83	97	No	No
0	0	0	0	0	0	1	non-exposed	Han	43	male	Middle school or high school	1	Married/cohabiting	20000~99999	Don't smoke	Yes	Not overweight	79	91	No	No
0	0	0	0	0	0	1	non-exposed	Han	43	male	Middle school or high school	1	Married/cohabiting	20000~99999	Don't smoke	Yes	Not overweight	76.5	85.5	No	No
0	0	0	0	0	0	1	non-exposed	Han	42	male	Middle school or high school	1	Married/cohabiting	20000~99999	Don't smoke	Yes	Not overweight	68.5	87.5	No	No
0	0	1	0	0	1	1	non-exposed	Han	41	male	Middle school or high school	1	Married/cohabiting	20000~99999	Don't smoke	Yes	Not overweight	74	86	No	No
0	0	0	0	0	0	1	non-exposed	Han	41	male	Middle school or high school	1	Married/cohabiting	20000~99999	Don't smoke	Yes	Not overweight	66	83	No	No
1	0	0	0	0	1	1	fetal exposure	Han	59	male	Middle school or high school	1	Married/cohabiting	>1000000	Don't smoke	Yes	Not overweight	92.8	95	No	No
0	0	0	0	0	0	1	non-exposed	Han	54	male	Middle school or high school	1	Married/cohabiting	>1000000	Don't smoke	Yes	Not overweight	71	90	No	No
2	0	2	0	0	4	0	non-exposed	Han	44	male	Middle school or high school	1	Married/cohabiting	>1000000	Don't smoke	Yes	Not overweight	76	88	No	No
2	0	1	0	0	3	0	non-exposed	Han	44	male	Middle school or high school	1	Married/cohabiting	>1000000	Don't smoke	Yes	Not overweight	78	93	No	No
0	0	0	0	0	0	1	adolescent exposure	Han	70	male	Primary school and below	2	Married/cohabiting	<20000	Don't smoke	Yes	Not overweight	78	87.5	No	No
2	0	2	0	0	4	0	adolescent exposure	Han	75	male	Middle school or high school	2	Married/cohabiting	<20000	Don't smoke	Yes	Not overweight	76	83.5	Yes	No
0	0	0	0	0	0	1	childhood exposure	Han	67	male	Middle school or high school	2	Married/cohabiting	<20000	Don't smoke	Yes	Not overweight	74	90	No	No
2	0	1	0	0	3	0	non-exposed	Han	54	male	Middle school or high school	2	Married/cohabiting	<20000	Don't smoke	Yes	Not overweight	80	89	No	No
0	0	0	0	0	0	1	adolescent exposure	Han	71	male	Primary school and below	2	Married/cohabiting	20000~99999	Don't smoke	Yes	Not overweight	85	97	No	No
0	0	0	0	0	0	1	childhood exposure	Han	64	male	Primary school and below	2	Married/cohabiting	20000~99999	Don't smoke	Yes	Not overweight	86	93	No	No
0	0	0	0	0	0	1	non-exposed	Han	76	male	Middle school or high school	2	Married/cohabiting	20000~99999	Don't smoke	Yes	Not overweight	77	84	No	No
0	0	0	0	0	0	1	adolescent exposure	Han	72	male	Middle school or high school	2	Married/cohabiting	20000~99999	Don't smoke	Yes	Not overweight	79	89	No	No
0	0	0	0	0	0	1	adolescent exposure	Han	70	male	Middle school or high school	2	Married/cohabiting	20000~99999	Don't smoke	Yes	Not overweight	83	90	No	No
0	0	0	0	0	0	1	childhood exposure	Han	66	male	Middle school or high school	2	Married/cohabiting	20000~99999	Don't smoke	Yes	Not overweight	79	88.2	No	No
0	0	0	0	0	0	1	childhood exposure	Han	61	male	Middle school or high school	2	Married/cohabiting	20000~99999	Don't smoke	Yes	Not overweight	81	87.5	No	No
2	0	1	0	0	3	0	non-exposed	Han	52	male	Middle school or high school	2	Married/cohabiting	20000~99999	Don't smoke	Yes	Not overweight	70.5	88	No	No
0	0	0	0	0	0	1	non-exposed	Han	45	male	University and above	2	Married/cohabiting	20000~99999	Don't smoke	Yes	Not overweight	81	91	No	No
2	0	1	0	0	3	0	non-exposed	Han	43	male	University and above	2	Married/cohabiting	20000~99999	Don't smoke	Yes	Not overweight	75.8	89.2	No	No
0	0	0	0	0	0	1	non-exposed	Han	43	male	Middle school or high school	2	Married/cohabiting	>1000000	Don't smoke	Yes	Not overweight	71	85	No	No
1	0	2	0	0	3	0	non-exposed	Han	40	male	Middle school or high school	2	Married/cohabiting	>1000000	Don't smoke	Yes	Not overweight	71.5	83	No	No
0	0	0	0	0	0	1	non-exposed	Han	52	male	University and above	2	Married/cohabiting	>1000000	Don't smoke	Yes	Not overweight	82	91	No	No
0	0	1	0	0	1	1	non-exposed	Han	41	male	University and above	2	Married/cohabiting	>1000000	Don't smoke	Yes	Not overweight	77	93	No	No
0	0	4	1	0	4	0	non-exposed	Han	53	male	Middle school or high school	3	Married/cohabiting	<20000	Don't smoke	Yes	Not overweight	76.5	89	No	No
2	0	4	1	0	6	0	non-exposed	Han	50	male	Primary school and below	3	Married/cohabiting	20000~99999	Don't smoke	Yes	Not overweight	68	86	No	No
1	0	4	1	0	5	0	non-exposed	Han	42	male	Middle school or high school	3	Married/cohabiting	20000~99999	Don't smoke	Yes	Not overweight	79	88	No	No
0	0	0	0	0	0	1	non-exposed	Han	44	male	University and above	3	Married/cohabiting	>1000000	Don't smoke	Yes	Not overweight	76.3	87	No	No
0	0	2	0	0	2	1	non-exposed	Han	47	male	Primary school and below	1	Separated/divorced	<20000	Don't smoke	Yes	Not overweight	67	88.6	No	No
0	0	0	0	0	0	1	childhood exposure	Han	66	male	Middle school or high school	1	Separated/divorced	<20000	Don't smoke	Yes	Not overweight	73	87	No	No
0	0	0	0	0	0	1	non-exposed	Han	76	male	Primary school and below	1	Widowed spouse	<20000	Don't smoke	Yes	Not overweight	79	89	No	No
1	0	0	0	0	1	1	adolescent exposure	Han	71	male	Primary school and below	1	Widowed spouse	<20000	Don't smoke	Yes	Not overweight	78	83	No	No
2	0	2	0	0	4	0	childhood exposure	Han	62	male	Primary school and below	1	Widowed spouse	<20000	Don't smoke	Yes	Not overweight	70	90.5	No	No
0	0	0	0	0	0	1	childhood exposure	Han	62	male	Primary school and below	1	Married/cohabiting	<20000	Don't smoke	No	Overweight	102.5	93	No	No
1	0	1	0	0	2	1	non-exposed	Han	54	male	Primary school and below	1	Married/cohabiting	<20000	Don't smoke	No	Overweight	88	89	No	No
0	0	0	0	0	0	1	non-exposed	Han	50	male	Primary school and below	1	Married/cohabiting	<20000	Don't smoke	No	Overweight	103	96.8	Yes	Yes
0	0	0	0	0	0	1	fetal exposure	Han	59	male	Middle school or high school	1	Married/cohabiting	<20000	Don't smoke	No	Overweight	81.5	92	No	Yes
0	0	0	0	0	0	1	childhood exposure	Han	64	male	Primary school and below	1	Married/cohabiting	20000~99999	Don't smoke	No	Overweight	92	90	Yes	No
0	0	0	0	0	0	1	childhood exposure	Han	63	male	Primary school and below	1	Married/cohabiting	20000~99999	Don't smoke	No	Overweight	94	93	Yes	Yes
1	0	2	0	0	3	0	childhood exposure	Han	61	male	Primary school and below	1	Married/cohabiting	20000~99999	Don't smoke	No	Overweight	93.5	93.3	Yes	Yes
1	0	1	0	0	2	1	childhood exposure	Han	61	male	Primary school and below	1	Married/cohabiting	20000~99999	Don't smoke	No	Overweight	88	95	No	No
0	0	0	0	0	0	1	non-exposed	Han	50	male	Primary school and below	1	Married/cohabiting	20000~99999	Don't smoke	No	Overweight	99.5	105	Yes	No
0	0	0	0	0	0	1	non-exposed	Han	49	male	Primary school and below	1	Married/cohabiting	20000~99999	Don't smoke	No	Overweight	114	109	No	No
0	0	0	0	0	0	1	fetal exposure	Han	59	male	Middle school or high school	1	Married/cohabiting	20000~99999	Don't smoke	No	Overweight	84	98.5	No	No
1	0	1	0	0	2	1	non-exposed	Han	53	male	Middle school or high school	1	Married/cohabiting	20000~99999	Don't smoke	No	Overweight	88	97	Yes	No
0	0	0	0	0	0	1	non-exposed	Han	45	male	Middle school or high school	1	Married/cohabiting	20000~99999	Don't smoke	No	Overweight	95	96	No	Yes
2	0	3	1	0	5	0	adolescent exposure	Han	72	male	Middle school or high school	2	Married/cohabiting	<20000	Don't smoke	No	Overweight	101.5	103.5	Yes	Yes
0	0	0	0	0	0	1	childhood exposure	Han	65	male	Middle school or high school	2	Married/cohabiting	20000~99999	Don't smoke	No	Overweight	85	92	Yes	Yes
0	0	0	0	0	0	1	childhood exposure	Han	63	male	Middle school or high school	2	Married/cohabiting	20000~99999	Don't smoke	No	Overweight	83	89.7	Yes	Yes
0	0	0	0	0	0	1	adolescent exposure	Han	71	male	Primary school and below	1	Widowed spouse	<20000	Don't smoke	No	Overweight	110	124	No	No
0	0	0	0	0	0	1	non-exposed	Han	52	male	Middle school or high school	1	Married/cohabiting	<20000	Don't smoke	No	Not overweight	75.3	83.9	Yes	Yes
0	0	0	0	0	0	1	childhood exposure	Han	69	male	Primary school and below	1	Widowed spouse	<20000	Don't smoke	No	Not overweight	84	90	Yes	No
0	0	0	0	0	0	1	non-exposed	Han	53	male	Primary school and below	1	Married/cohabiting	<20000	Don't smoke	No	Overweight	91.5	95.5	Yes	No
0	0	0	0	0	0	1	non-exposed	Han	53	male	Primary school and below	1	Married/cohabiting	<20000	Don't smoke	No	Overweight	91	95.1	Yes	No
4	1	6	1	1	10	0	non-exposed	Han	49	male	Primary school and below	1	Married/cohabiting	<20000	Don't smoke	No	Overweight	89.8	97.5	Yes	No
0	0	0	0	0	0	1	adolescent exposure	Han	71	male	Middle school or high school	1	Married/cohabiting	<20000	Don't smoke	No	Overweight	79	89	Yes	No
0	0	0	0	0	0	1	fetal exposure	Han	59	male	Middle school or high school	1	Married/cohabiting	<20000	Don't smoke	No	Overweight	92	98	No	No
2	0	2	0	0	4	0	non-exposed	Han	56	male	Middle school or high school	1	Married/cohabiting	<20000	Don't smoke	No	Overweight	72	86	No	No
1	0	0	0	0	1	1	non-exposed	Han	56	male	Middle school or high school	1	Married/cohabiting	<20000	Don't smoke	No	Overweight	91	95.8	Yes	No
0	0	0	0	0	0	1	non-exposed	Han	55	male	Middle school or high school	1	Married/cohabiting	<20000	Don't smoke	No	Overweight	98	104	Yes	No
0	0	0	0	0	0	1	non-exposed	Han	45	male	Middle school or high school	1	Married/cohabiting	<20000	Don't smoke	No	Overweight	81	90.7	No	No
0	0	0	0	0	0	1	non-exposed	Han	43	male	Middle school or high school	1	Married/cohabiting	<20000	Don't smoke	No	Overweight	90.9	88.5	Yes	No
0	0	0	0	0	0	1	childhood exposure	Han	63	male	Primary school and below	1	Married/cohabiting	20000~99999	Don't smoke	No	Overweight	78.4	87.5	Yes	No
0	0	0	0	0	0	1	childhood exposure	Han	62	male	Primary school and below	1	Married/cohabiting	20000~99999	Don't smoke	No	Overweight	89	98.4	No	No
1	0	2	0	0	3	0	childhood exposure	Han	61	male	Primary school and below	1	Married/cohabiting	20000~99999	Don't smoke	No	Overweight	87	93	Yes	No
3	1	2	0	0	5	0	non-exposed	Han	53	male	Primary school and below	1	Married/cohabiting	20000~99999	Don't smoke	No	Overweight	76	87	Yes	No
0	0	2	0	0	2	1	non-exposed	Han	50	male	Primary school and below	1	Married/cohabiting	20000~99999	Don't smoke	No	Overweight	82	91	No	No
0	0	0	0	0	0	1	non-exposed	Han	48	male	Primary school and below	1	Married/cohabiting	20000~99999	Don't smoke	No	Overweight	102	102	Yes	No
0	0	0	0	0	0	1	childhood exposure	Han	66	male	Middle school or high school	1	Married/cohabiting	20000~99999	Don't smoke	No	Overweight	96	100	Yes	No
1	0	1	0	0	2	1	childhood exposure	Han	62	male	Middle school or high school	1	Married/cohabiting	20000~99999	Don't smoke	No	Overweight	89	91	No	No
1	0	1	0	0	1	1	fetal exposure	Han	58	male	Middle school or high school	1	Married/cohabiting	20000~99999	Don't smoke	No	Overweight	85	96	No	No
0	0	0	0	0	0	1	non-exposed	Han	55	male	Middle school or high school	1	Married/cohabiting	20000~99999	Don't smoke	No	Overweight	87	96	No	No
1	0	1	0	0	2	1	non-exposed	Han	53	male	Middle school or high school	1	Married/cohabiting	20000~99999	Don't smoke	No	Overweight	85.5	97	Yes	No
2	0	2	0	0	4	0	non-exposed	Han	53	male	Middle school or high school	1	Married/cohabiting	20000~99999	Don't smoke	No	Overweight	85	96.5	No	No
1	0	2	0	0	3	0	non-exposed	Han	45	male	Middle school or high school	1	Married/cohabiting	20000~99999	Don't smoke	No	Overweight	92.5	103.5	Yes	No
2	0	2	0	0	4	0	non-exposed	Han	43	male	Middle school or high school	1	Married/cohabiting	20000~99999	Don't smoke	No	Overweight	97	101.7	No	No
1	0	0	0	0	1	1	childhood exposure	Han	65	male	University and above	1	Married/cohabiting	20000~99999	Don't smoke	No	Overweight	77	91	Yes	No
1	0	1	0	0	2	1	non-exposed	Han	46	male	University and above	1	Married/cohabiting	20000~99999	Don't smoke	No	Overweight	88	88.5	No	No
0	0	0	0	0	0	1	adolescent exposure	Han	72	male	Primary school and below	1	Married/cohabiting	>1000000	Don't smoke	No	Overweight	85	95	No	No
0	0	0	0	0	0	1	adolescent exposure	Han	70	male	Middle school or high school	2	Married/cohabiting	20000~99999	Don't smoke	No	Overweight	79	91	No	No
0	0	0	0	0	0	1	fetal exposure	Han	59	male	Middle school or high school	2	Married/cohabiting	20000~99999	Don't smoke	No	Overweight	90	94	No	No
0	0	0	0	0	0	1	non-exposed	Han	54	male	Middle school or high school	2	Married/cohabiting	20000~99999	Don't smoke	No	Overweight	86	94	No	No
2	0	0	0	0	2	1	non-exposed	Han	41	male	Middle school or high school	2	Married/cohabiting	20000~99999	Don't smoke	No	Overweight	87.5	100.5	No	No
2	0	1	0	0	3	0	non-exposed	Han	52	male	University and above	2	Married/cohabiting	20000~99999	Don't smoke	No	Overweight	79	92	No	No
0	0	0	0	0	0	1	non-exposed	Han	46	male	University and above	2	Married/cohabiting	20000~99999	Don't smoke	No	Overweight	97	102	Yes	No
0	0	0	0	0	0	1	adolescent exposure	Han	74	male	Middle school or high school	2	Married/cohabiting	>1000000	Don't smoke	No	Overweight	83	98	No	No
0	0	0	0	0	0	1	non-exposed	Han	48	male	Middle school or high school	2	Married/cohabiting	>1000000	Don't smoke	No	Overweight	87.5	95	No	No
0	0	0	0	0	0	1	non-exposed	Han	48	male	University and above	2	Married/cohabiting	>1000000	Don't smoke	No	Overweight	87	99	No	No
0	0	0	0	0	0	1	non-exposed	Han	46	male	University and above	2	Married/cohabiting	>1000000	Don't smoke	No	Overweight	76	87.5	No	No
2	0	2	0	0	4	0	non-exposed	Han	42	male	University and above	3	Married/cohabiting	>1000000	Don't smoke	No	Overweight	87	91	Yes	No
0	0	0	0	0	0	1	childhood exposure	Han	62	male	Middle school or high school	2	Separated/divorced	<20000	Don't smoke	No	Overweight	88	95	No	No
1	0	0	0	0	1	1	childhood exposure	Han	68	male	Primary school and below	1	Married/cohabiting	<20000	Don't smoke	No	Not overweight	76.5	89.7	No	No
2	0	2	0	0	4	0	childhood exposure	Han	68	male	Primary school and below	1	Married/cohabiting	<20000	Don't smoke	No	Not overweight	74	83	No	No
0	0	0	0	0	0	1	childhood exposure	Han	67	male	Primary school and below	1	Married/cohabiting	<20000	Don't smoke	No	Not overweight	68.8	86.7	Yes	No
0	0	0	0	0	0	1	childhood exposure	Han	66	male	Primary school and below	1	Married/cohabiting	<20000	Don't smoke	No	Not overweight	85	97.3	No	No
2	0	2	0	0	4	0	childhood exposure	Han	65	male	Primary school and below	1	Married/cohabiting	<20000	Don't smoke	No	Not overweight	64.5	73.2	Yes	No
1	0	0	0	0	1	1	childhood exposure	Han	64	male	Primary school and below	1	Married/cohabiting	<20000	Don't smoke	No	Not overweight	74	86.5	Yes	No
2	0	2	0	0	4	0	childhood exposure	Han	63	male	Primary school and below	1	Married/cohabiting	<20000	Don't smoke	No	Not overweight	76	86	No	No
1	0	0	0	0	1	1	non-exposed	Han	55	male	Primary school and below	1	Married/cohabiting	<20000	Don't smoke	No	Not overweight	78.5	88	Yes	No
4	1	4	1	1	8	0	non-exposed	Han	55	male	Primary school and below	1	Married/cohabiting	<20000	Don't smoke	No	Not overweight	66	88	No	No
2	0	2	0	0	4	0	non-exposed	Han	50	male	Primary school and below	1	Married/cohabiting	<20000	Don't smoke	No	Not overweight	77.5	87.2	No	No
1	0	0	0	0	1	1	non-exposed	Han	44	male	Primary school and below	1	Married/cohabiting	<20000	Don't smoke	No	Not overweight	67.5	81.2	No	No
0	0	0	0	0	0	1	childhood exposure	Han	65	male	Middle school or high school	1	Married/cohabiting	<20000	Don't smoke	No	Not overweight	86	91	Yes	No
2	0	2	0	0	4	0	childhood exposure	Han	64	male	Middle school or high school	1	Married/cohabiting	<20000	Don't smoke	No	Not overweight	85	102	No	No
2	0	2	0	0	4	0	childhood exposure	Han	62	male	Middle school or high school	1	Married/cohabiting	<20000	Don't smoke	No	Not overweight	63	81	No	No
2	0	2	0	0	4	0	childhood exposure	Han	61	male	Middle school or high school	1	Married/cohabiting	<20000	Don't smoke	No	Not overweight	85	85	Yes	No
2	0	2	0	0	4	0	childhood exposure	Han	61	male	Middle school or high school	1	Married/cohabiting	<20000	Don't smoke	No	Not overweight	75.2	90.7	Yes	No
0	0	0	0	0	0	1	non-exposed	Han	55	male	Middle school or high school	1	Married/cohabiting	<20000	Don't smoke	No	Not overweight	81.5	86	No	No
0	0	0	0	0	0	1	non-exposed	Han	50	male	Middle school or high school	1	Married/cohabiting	<20000	Don't smoke	No	Not overweight	70	80.5	No	No
1	0	1	0	0	2	1	non-exposed	Han	44	male	Middle school or high school	1	Married/cohabiting	<20000	Don't smoke	No	Not overweight	70	82	No	No
1	0	2	0	0	3	0	childhood exposure	Han	63	male	Primary school and below	1	Married/cohabiting	20000~99999	Don't smoke	No	Not overweight	64.3	83	Yes	No
0	0	0	0	0	0	1	non-exposed	Han	56	male	Primary school and below	1	Married/cohabiting	20000~99999	Don't smoke	No	Not overweight	73	87	No	No
1	0	1	0	0	2	1	non-exposed	Han	50	male	Primary school and below	1	Married/cohabiting	20000~99999	Don't smoke	No	Not overweight	89	98.5	No	No
2	0	2	0	0	4	0	non-exposed	Han	50	male	Primary school and below	1	Married/cohabiting	20000~99999	Don't smoke	No	Not overweight	77	89	Yes	No
0	0	0	0	0	0	1	non-exposed	Han	47	male	Primary school and below	1	Married/cohabiting	20000~99999	Don't smoke	No	Not overweight	66.5	85.7	Yes	No
0	0	0	0	0	0	1	non-exposed	Han	43	male	Primary school and below	1	Married/cohabiting	20000~99999	Don't smoke	No	Not overweight	73	89.2	No	No
0	0	0	0	0	0	1	non-exposed	Han	53	male	Middle school or high school	1	Married/cohabiting	20000~99999	Don't smoke	No	Not overweight	69.5	89.5	No	No
1	0	1	0	0	2	1	non-exposed	Han	48	male	Middle school or high school	1	Married/cohabiting	20000~99999	Don't smoke	No	Not overweight	76	92	No	No
0	0	1	0	0	1	1	non-exposed	Han	54	male	University and above	1	Married/cohabiting	20000~99999	Don't smoke	No	Not overweight	77	96.3	Yes	No
0	0	0	0	0	0	1	adolescent exposure	Han	73	male	Primary school and below	1	Married/cohabiting	>1000000	Don't smoke	No	Not overweight	68	88	No	No
0	0	0	0	0	0	1	childhood exposure	Han	66	male	Middle school or high school	2	Married/cohabiting	20000~99999	Don't smoke	No	Not overweight	81	89.5	Yes	No
0	0	0	0	0	0	1	non-exposed	Han	41	male	University and above	3	Married/cohabiting	>1000000	Don't smoke	No	Not overweight	86	93.4	No	No
1	0	0	0	0	1	1	adolescent exposure	Han	75	male	Primary school and below	1	Widowed spouse	<20000	Don't smoke	No	Not overweight	59	78	No	No
0	0	0	0	0	0	1	non-exposed	Han	76	male	Middle school or high school	1	Widowed spouse	20000~99999	Don't smoke	No	Not overweight	64	78	Yes	No
1	0	0	0	0	1	1	childhood exposure	Han	64	male	Primary school and below	1	Widowed spouse	>1000000	Don't smoke	No	Not overweight	67	82	No	No
0	0	0	0	0	0	1	childhood exposure	Han	65	male	University and above	2	Widowed spouse	>1000000	Don't smoke	No	Not overweight	91.5	93.5	Yes	No
2	0	0	0	0	2	1	childhood exposure	Han	67	male	Primary school and below	1	Married/cohabiting	<20000	Don't smoke	No	Overweight	91	93	Yes	No
0	0	0	0	0	0	1	childhood exposure	Han	65	male	Primary school and below	1	Married/cohabiting	<20000	Don't smoke	No	Overweight	87	97.5	Yes	No
0	0	0	0	0	0	1	non-exposed	Han	78	male	Middle school or high school	1	Married/cohabiting	<20000	Don't smoke	No	Overweight	96	102	Yes	Yes
0	0	0	0	0	0	1	non-exposed	Han	78	male	Middle school or high school	1	Married/cohabiting	<20000	Don't smoke	No	Overweight	86.1	90	Yes	Yes
2	0	1	0	0	3	0	non-exposed	Han	50	male	Middle school or high school	1	Married/cohabiting	<20000	Don't smoke	No	Overweight	94.3	93.5	No	Yes
2	0	2	0	0	4	0	non-exposed	Han	52	male	Primary school and below	1	Married/cohabiting	20000~99999	Don't smoke	No	Overweight	72.3	83.2	No	No
0	0	0	0	0	0	1	non-exposed	Han	43	male	Primary school and below	1	Married/cohabiting	20000~99999	Don't smoke	No	Overweight	85	87	No	Yes
0	0	1	0	0	1	1	childhood exposure	Han	60	male	Middle school or high school	1	Married/cohabiting	20000~99999	Don't smoke	No	Overweight	90.8	98.5	No	No
0	0	0	0	0	0	1	fetal exposure	Han	59	male	Middle school or high school	1	Married/cohabiting	20000~99999	Don't smoke	No	Overweight	91	98	No	No
0	0	0	0	0	0	1	non-exposed	Han	54	male	Middle school or high school	1	Married/cohabiting	20000~99999	Don't smoke	No	Overweight	86	87	No	No
1	0	0	0	0	1	1	non-exposed	Han	53	male	Middle school or high school	1	Married/cohabiting	20000~99999	Don't smoke	No	Overweight	77	88	No	Yes
0	0	3	1	0	3	0	non-exposed	Han	46	male	Middle school or high school	1	Married/cohabiting	20000~99999	Don't smoke	No	Overweight	84	98	No	No
0	0	0	0	0	0	1	childhood exposure	Han	66	male	Primary school and below	1	Married/cohabiting	>1000000	Don't smoke	No	Overweight	83	93.6	No	Yes
0	0	0	0	0	0	1	childhood exposure	Han	63	male	Middle school or high school	1	Married/cohabiting	>1000000	Don't smoke	No	Overweight	91	98	Yes	No
0	0	0	0	0	0	1	non-exposed	Han	55	male	University and above	2	Married/cohabiting	20000~99999	Don't smoke	No	Overweight	83	90.3	No	Yes
0	0	0	0	0	0	1	childhood exposure	Han	65	male	Primary school and below	2	Married/cohabiting	>1000000	Don't smoke	No	Overweight	79.5	90	Yes	Yes
0	0	0	0	0	0	1	adolescent exposure	Han	72	male	Middle school or high school	2	Married/cohabiting	>1000000	Don't smoke	No	Overweight	81	93	No	No
2	0	2	0	0	4	0	non-exposed	Han	46	male	Middle school or high school	2	Married/cohabiting	>1000000	Don't smoke	No	Overweight	104.3	106.8	No	Yes
0	0	0	0	0	0	1	non-exposed	Han	53	male	University and above	2	Married/cohabiting	>1000000	Don't smoke	No	Overweight	84.5	97.5	No	No
0	0	0	0	0	0	1	non-exposed	Han	47	male	University and above	2	Married/cohabiting	>1000000	Don't smoke	No	Overweight	87.5	92.6	No	Yes
2	0	2	0	0	4	0	non-exposed	Han	43	male	Primary school and below	1	Separated/divorced	<20000	Don't smoke	No	Overweight	89	97	No	No
0	0	0	0	0	0	1	childhood exposure	Han	66	male	Middle school or high school	1	Widowed spouse	20000~99999	Don't smoke	No	Overweight	86	92	No	No
0	0	2	0	0	2	1	childhood exposure	Han	64	male	Middle school or high school	2	Widowed spouse	<20000	Don't smoke	No	Overweight	94.5	103.5	Yes	Yes
1	0	2	0	0	3	0	non-exposed	Han	78	male	Primary school and below	1	Married/cohabiting	<20000	Don't smoke	No	Not overweight	67	84.5	Yes	No
1	0	0	0	0	1	1	non-exposed	Han	76	male	Primary school and below	1	Married/cohabiting	<20000	Don't smoke	No	Not overweight	74	85	Yes	No
1	0	2	0	0	3	0	childhood exposure	Han	68	male	Primary school and below	1	Married/cohabiting	<20000	Don't smoke	No	Not overweight	66	79	No	No
0	0	0	0	0	0	1	non-exposed	Han	52	male	Primary school and below	1	Married/cohabiting	<20000	Don't smoke	No	Not overweight	69	84	No	No
3	1	4	1	1	7	0	non-exposed	Han	49	male	Primary school and below	1	Married/cohabiting	<20000	Don't smoke	No	Not overweight	78	85	No	Yes
0	0	1	0	0	1	1	childhood exposure	Han	63	male	Middle school or high school	1	Married/cohabiting	<20000	Don't smoke	No	Not overweight	83.5	90	No	No
0	0	0	0	0	0	1	childhood exposure	Han	61	male	Middle school or high school	1	Married/cohabiting	<20000	Don't smoke	No	Not overweight	66.2	87	No	No
3	1	3	1	1	6	0	childhood exposure	Han	64	male	Primary school and below	1	Married/cohabiting	20000~99999	Don't smoke	No	Not overweight	78	87	No	No
0	0	0	0	0	0	1	non-exposed	Han	55	male	Primary school and below	1	Married/cohabiting	20000~99999	Don't smoke	No	Not overweight	81	91	No	No
2	0	2	0	0	4	0	non-exposed	Han	52	male	Middle school or high school	1	Married/cohabiting	20000~99999	Don't smoke	No	Not overweight	86.6	96.2	No	No
0	0	1	0	0	1	1	adolescent exposure	Han	70	male	Middle school or high school	3	Married/cohabiting	20000~99999	Don't smoke	No	Not overweight	84	88	Yes	Yes
0	0	0	0	0	0	1	adolescent exposure	Han	72	male	Middle school or high school	1	Widowed spouse	<20000	Don't smoke	No	Not overweight	77	91.5	Yes	No
0	0	0	0	0	0	1	adolescent exposure	Han	75	male	Primary school and below	1	Married/cohabiting	<20000	Don't smoke	No	Overweight	82	87.5	No	No
0	0	0	0	0	0	1	adolescent exposure	Han	70	male	Primary school and below	1	Married/cohabiting	<20000	Don't smoke	No	Overweight	90	100	Yes	No
6	1	6	1	1	12	0	childhood exposure	Han	67	male	Primary school and below	1	Married/cohabiting	<20000	Don't smoke	No	Overweight	98	99.5	Yes	No
2	0	0	0	0	2	1	childhood exposure	Han	65	male	Primary school and below	1	Married/cohabiting	<20000	Don't smoke	No	Overweight	93.5	94	Yes	No
0	0	0	0	0	0	1	childhood exposure	Han	64	male	Primary school and below	1	Married/cohabiting	<20000	Don't smoke	No	Overweight	84	92.5	No	No
0	0	0	0	0	0	1	childhood exposure	Han	64	male	Primary school and below	1	Married/cohabiting	<20000	Don't smoke	No	Overweight	93	98	Yes	No
1	0	0	0	0	1	1	fetal exposure	Han	58	male	Primary school and below	1	Married/cohabiting	<20000	Don't smoke	No	Overweight	82	89	Yes	No
2	0	2	0	0	4	0	non-exposed	Han	55	male	Primary school and below	1	Married/cohabiting	<20000	Don't smoke	No	Overweight	86	96	No	No
0	0	1	0	0	1	1	non-exposed	Han	53	male	Primary school and below	1	Married/cohabiting	<20000	Don't smoke	No	Overweight	80	88	No	No
0	0	0	0	0	0	1	non-exposed	Han	52	male	Primary school and below	1	Married/cohabiting	<20000	Don't smoke	No	Overweight	79.6	92.8	No	No
0	0	0	0	0	0	1	non-exposed	Han	51	male	Primary school and below	1	Married/cohabiting	<20000	Don't smoke	No	Overweight	86	90	No	No
0	0	0	0	0	0	1	non-exposed	Han	50	male	Primary school and below	1	Married/cohabiting	<20000	Don't smoke	No	Overweight	88	97	No	No
0	0	0	0	0	0	1	non-exposed	Han	49	male	Primary school and below	1	Married/cohabiting	<20000	Don't smoke	No	Overweight	86	87.5	No	No
0	0	3	1	0	3	0	non-exposed	Han	48	male	Primary school and below	1	Married/cohabiting	<20000	Don't smoke	No	Overweight	74.5	86	No	No
0	0	0	0	0	0	1	non-exposed	Han	48	male	Primary school and below	1	Married/cohabiting	<20000	Don't smoke	No	Overweight	87.5	97.8	No	No
4	1	4	1	1	8	0	non-exposed	Han	48	male	Primary school and below	1	Married/cohabiting	<20000	Don't smoke	No	Overweight	95.4	105.6	No	No
1	0	1	0	0	2	1	non-exposed	Han	45	male	Primary school and below	1	Married/cohabiting	<20000	Don't smoke	No	Overweight	78	90	No	No
2	0	1	0	0	3	0	non-exposed	Han	43	male	Primary school and below	1	Married/cohabiting	<20000	Don't smoke	No	Overweight	92	98	No	No
2	0	2	0	0	4	0	childhood exposure	Han	65	male	Middle school or high school	1	Married/cohabiting	<20000	Don't smoke	No	Overweight	95	95	Yes	No
0	0	0	0	0	0	1	childhood exposure	Han	63	male	Middle school or high school	1	Married/cohabiting	<20000	Don't smoke	No	Overweight	76.5	92.5	No	No
0	0	0	0	0	0	1	childhood exposure	Han	61	male	Middle school or high school	1	Married/cohabiting	<20000	Don't smoke	No	Overweight	85	92	No	No
4	1	2	0	0	2	1	fetal exposure	Han	58	male	Middle school or high school	1	Married/cohabiting	<20000	Don't smoke	No	Overweight	82	103	No	No
0	0	0	0	0	0	1	fetal exposure	Han	58	male	Middle school or high school	1	Married/cohabiting	<20000	Don't smoke	No	Overweight	92	94.5	No	No
2	0	2	0	0	4	0	non-exposed	Han	55	male	Middle school or high school	1	Married/cohabiting	<20000	Don't smoke	No	Overweight	84	94	No	No
2	0	2	0	0	4	0	non-exposed	Han	54	male	Middle school or high school	1	Married/cohabiting	<20000	Don't smoke	No	Overweight	78.5	86.5	No	No
3	1	3	1	1	6	0	non-exposed	Han	51	male	Middle school or high school	1	Married/cohabiting	<20000	Don't smoke	No	Overweight	94	91	No	No
4	1	3	1	1	7	0	non-exposed	Han	51	male	Middle school or high school	1	Married/cohabiting	<20000	Don't smoke	No	Overweight	80	90	No	No
2	0	0	0	0	2	1	non-exposed	Han	46	male	Middle school or high school	1	Married/cohabiting	<20000	Don't smoke	No	Overweight	84	94	No	No
0	0	0	0	0	0	1	non-exposed	Han	46	male	Middle school or high school	1	Married/cohabiting	<20000	Don't smoke	No	Overweight	76	89.8	No	No
1	0	0	0	0	1	1	non-exposed	Han	45	male	Middle school or high school	1	Married/cohabiting	<20000	Don't smoke	No	Overweight	94	92	No	No
3	1	1	0	0	4	0	non-exposed	Han	45	male	Middle school or high school	1	Married/cohabiting	<20000	Don't smoke	No	Overweight	83	93	No	No
0	0	0	0	0	0	1	non-exposed	Han	44	male	Middle school or high school	1	Married/cohabiting	<20000	Don't smoke	No	Overweight	77.3	86.5	No	No
2	0	1	0	0	3	0	non-exposed	Han	43	male	Middle school or high school	1	Married/cohabiting	<20000	Don't smoke	No	Overweight	89	94.5	No	No
0	0	1	0	0	1	1	non-exposed	Han	42	male	Middle school or high school	1	Married/cohabiting	<20000	Don't smoke	No	Overweight	76.2	90.5	No	No
0	0	0	0	0	0	1	non-exposed	Han	42	male	Middle school or high school	1	Married/cohabiting	<20000	Don't smoke	No	Overweight	83.5	99.5	No	No
0	0	0	0	0	0	1	non-exposed	Han	42	male	Middle school or high school	1	Married/cohabiting	<20000	Don't smoke	No	Overweight	80.6	98	No	No
1	0	0	0	0	1	1	non-exposed	Han	41	male	Middle school or high school	1	Married/cohabiting	<20000	Don't smoke	No	Overweight	72.2	90	No	No
2	0	1	0	0	3	0	childhood exposure	Han	68	male	Primary school and below	1	Married/cohabiting	20000~99999	Don't smoke	No	Overweight	86	95.2	Yes	No
0	0	0	0	0	0	1	non-exposed	Han	56	male	Primary school and below	1	Married/cohabiting	20000~99999	Don't smoke	No	Overweight	85	91.5	No	No
2	0	2	0	0	4	0	non-exposed	Han	52	male	Primary school and below	1	Married/cohabiting	20000~99999	Don't smoke	No	Overweight	85	96	No	No
4	1	3	1	1	7	0	non-exposed	Han	52	male	Primary school and below	1	Married/cohabiting	20000~99999	Don't smoke	No	Overweight	84.1	95	No	No
0	0	0	0	0	0	1	non-exposed	Han	52	male	Primary school and below	1	Married/cohabiting	20000~99999	Don't smoke	No	Overweight	87	91	Yes	No
0	0	0	0	0	0	1	non-exposed	Han	52	male	Primary school and below	1	Married/cohabiting	20000~99999	Don't smoke	No	Overweight	99	104	No	No
0	0	0	0	0	0	1	non-exposed	Han	51	male	Primary school and below	1	Married/cohabiting	20000~99999	Don't smoke	No	Overweight	84.5	95.5	No	No
2	0	2	0	0	4	0	non-exposed	Han	51	male	Primary school and below	1	Married/cohabiting	20000~99999	Don't smoke	No	Overweight	82	92	No	No
2	0	2	0	0	4	0	non-exposed	Han	50	male	Primary school and below	1	Married/cohabiting	20000~99999	Don't smoke	No	Overweight	93	93.5	No	No
0	0	0	0	0	0	1	non-exposed	Han	50	male	Primary school and below	1	Married/cohabiting	20000~99999	Don't smoke	No	Overweight	77	87.5	No	No
2	0	1	0	0	3	0	non-exposed	Han	49	male	Primary school and below	1	Married/cohabiting	20000~99999	Don't smoke	No	Overweight	77	95	No	No
0	0	0	0	0	0	1	non-exposed	Han	49	male	Primary school and below	1	Married/cohabiting	20000~99999	Don't smoke	No	Overweight	97	95	No	No
1	0	0	0	0	1	1	non-exposed	Han	48	male	Primary school and below	1	Married/cohabiting	20000~99999	Don't smoke	No	Overweight	103	97	No	No
2	0	1	0	0	3	0	non-exposed	Han	47	male	Primary school and below	1	Married/cohabiting	20000~99999	Don't smoke	No	Overweight	79	88	No	No
0	0	0	0	0	0	1	non-exposed	Han	46	male	Primary school and below	1	Married/cohabiting	20000~99999	Don't smoke	No	Overweight	96	97.5	No	No
1	0	1	0	0	2	1	non-exposed	Han	46	male	Primary school and below	1	Married/cohabiting	20000~99999	Don't smoke	No	Overweight	83	87	No	No
0	0	0	0	0	0	1	non-exposed	Han	46	male	Primary school and below	1	Married/cohabiting	20000~99999	Don't smoke	No	Overweight	80.5	92	No	No
0	0	1	0	0	1	1	non-exposed	Han	46	male	Primary school and below	1	Married/cohabiting	20000~99999	Don't smoke	No	Overweight	93.3	95.3	No	No
1	0	0	0	0	1	1	non-exposed	Han	46	male	Primary school and below	1	Married/cohabiting	20000~99999	Don't smoke	No	Overweight	91	95	No	No
0	0	0	0	0	0	1	non-exposed	Han	45	male	Primary school and below	1	Married/cohabiting	20000~99999	Don't smoke	No	Overweight	81	90	No	No
0	0	0	0	0	0	1	non-exposed	Han	55	male	Middle school or high school	1	Married/cohabiting	20000~99999	Don't smoke	No	Overweight	92	98	Yes	No
0	0	0	0	0	0	1	non-exposed	Han	55	male	Middle school or high school	1	Married/cohabiting	20000~99999	Don't smoke	No	Overweight	85	91	No	No
0	0	0	0	0	0	1	non-exposed	Han	54	male	Middle school or high school	1	Married/cohabiting	20000~99999	Don't smoke	No	Overweight	81	90	No	No
0	0	0	0	0	0	1	non-exposed	Han	54	male	Middle school or high school	1	Married/cohabiting	20000~99999	Don't smoke	No	Overweight	87	92	No	No
0	0	0	0	0	0	1	non-exposed	Han	54	male	Middle school or high school	1	Married/cohabiting	20000~99999	Don't smoke	No	Overweight	67	80	No	No
0	0	0	0	0	0	1	non-exposed	Han	54	male	Middle school or high school	1	Married/cohabiting	20000~99999	Don't smoke	No	Overweight	87	99	No	No
0	0	0	0	0	0	1	non-exposed	Han	54	male	Middle school or high school	1	Married/cohabiting	20000~99999	Don't smoke	No	Overweight	80	96	Yes	No
0	0	0	0	0	0	1	non-exposed	Han	52	male	Middle school or high school	1	Married/cohabiting	20000~99999	Don't smoke	No	Overweight	84	89	No	No
1	0	3	1	0	4	0	non-exposed	Han	51	male	Middle school or high school	1	Married/cohabiting	20000~99999	Don't smoke	No	Overweight	88.5	92	No	No
1	0	1	0	0	2	1	non-exposed	Han	51	male	Middle school or high school	1	Married/cohabiting	20000~99999	Don't smoke	No	Overweight	88	91	No	No
0	0	0	0	0	0	1	non-exposed	Han	50	male	Middle school or high school	1	Married/cohabiting	20000~99999	Don't smoke	No	Overweight	78	89.2	No	No
1	0	2	0	0	3	0	non-exposed	Han	50	male	Middle school or high school	1	Married/cohabiting	20000~99999	Don't smoke	No	Overweight	82	92	No	No
0	0	0	0	0	0	1	non-exposed	Han	49	male	Middle school or high school	1	Married/cohabiting	20000~99999	Don't smoke	No	Overweight	74	90	No	No
1	0	0	0	0	1	1	non-exposed	Han	48	male	Middle school or high school	1	Married/cohabiting	20000~99999	Don't smoke	No	Overweight	99.1	102.7	No	No
0	0	0	0	0	0	1	non-exposed	Han	48	male	Middle school or high school	1	Married/cohabiting	20000~99999	Don't smoke	No	Overweight	78	88	No	No
0	0	0	0	0	0	1	non-exposed	Han	48	male	Middle school or high school	1	Married/cohabiting	20000~99999	Don't smoke	No	Overweight	75	88	No	No
0	0	0	0	0	0	1	non-exposed	Han	46	male	Middle school or high school	1	Married/cohabiting	20000~99999	Don't smoke	No	Overweight	80	94.5	No	No
2	0	2	0	0	4	0	non-exposed	Han	45	male	Middle school or high school	1	Married/cohabiting	20000~99999	Don't smoke	No	Overweight	77	90	No	No
1	0	0	0	0	1	1	non-exposed	Han	45	male	Middle school or high school	1	Married/cohabiting	20000~99999	Don't smoke	No	Overweight	93	101	No	No
2	0	2	0	0	4	0	non-exposed	Han	45	male	Middle school or high school	1	Married/cohabiting	20000~99999	Don't smoke	No	Overweight	80	89.5	No	No
0	0	0	0	0	0	1	non-exposed	Han	45	male	Middle school or high school	1	Married/cohabiting	20000~99999	Don't smoke	No	Overweight	95	101	No	No
0	0	0	0	0	0	1	non-exposed	Han	44	male	Middle school or high school	1	Married/cohabiting	20000~99999	Don't smoke	No	Overweight	85	99	No	No
3	1	3	1	1	6	0	non-exposed	Han	43	male	Middle school or high school	1	Married/cohabiting	20000~99999	Don't smoke	No	Overweight	86	94.5	No	No
0	0	1	0	0	1	1	non-exposed	Han	43	male	Middle school or high school	1	Married/cohabiting	20000~99999	Don't smoke	No	Overweight	73.3	88.2	No	No
1	0	2	0	0	3	0	non-exposed	Han	43	male	Middle school or high school	1	Married/cohabiting	20000~99999	Don't smoke	No	Overweight	86	97	No	No
2	0	2	0	0	4	0	non-exposed	Han	42	male	Middle school or high school	1	Married/cohabiting	20000~99999	Don't smoke	No	Overweight	94.2	97.5	Yes	No
0	0	0	0	0	0	1	non-exposed	Han	41	male	Middle school or high school	1	Married/cohabiting	20000~99999	Don't smoke	No	Overweight	85	96	No	No
0	0	0	0	0	0	1	non-exposed	Han	49	male	Middle school or high school	1	Married/cohabiting	>1000000	Don't smoke	No	Overweight	88.9	96.4	No	No
0	0	0	0	0	0	1	non-exposed	Han	46	male	Middle school or high school	1	Married/cohabiting	>1000000	Don't smoke	No	Overweight	90	97	No	No
6	1	6	1	1	12	0	non-exposed	Han	56	male	Primary school and below	2	Married/cohabiting	<20000	Don't smoke	No	Overweight	81	92	No	No
0	0	0	0	0	0	1	childhood exposure	Han	63	male	Middle school or high school	2	Married/cohabiting	<20000	Don't smoke	No	Overweight	90	94	Yes	No
1	0	1	0	0	2	1	non-exposed	Han	54	male	Middle school or high school	2	Married/cohabiting	<20000	Don't smoke	No	Overweight	94	91	Yes	No
2	0	1	0	0	3	0	non-exposed	Han	48	male	Middle school or high school	2	Married/cohabiting	<20000	Don't smoke	No	Overweight	87	93	No	No
0	0	0	0	0	0	1	non-exposed	Han	43	male	Middle school or high school	2	Married/cohabiting	<20000	Don't smoke	No	Overweight	84	91	No	No
0	0	2	0	0	2	1	non-exposed	Han	51	male	University and above	2	Married/cohabiting	<20000	Don't smoke	No	Overweight	83	96.5	No	No
0	0	2	0	0	2	1	childhood exposure	Han	65	male	Primary school and below	2	Married/cohabiting	20000~99999	Don't smoke	No	Overweight	95	100.5	No	No
0	0	0	0	0	0	1	childhood exposure	Han	63	male	Primary school and below	2	Married/cohabiting	20000~99999	Don't smoke	No	Overweight	84	94	No	No
0	0	2	0	0	2	1	childhood exposure	Han	61	male	Middle school or high school	2	Married/cohabiting	20000~99999	Don't smoke	No	Overweight	81.5	89	No	No
0	0	0	0	0	0	1	fetal exposure	Han	59	male	Middle school or high school	2	Married/cohabiting	20000~99999	Don't smoke	No	Overweight	80.5	91	Yes	No
1	0	0	0	0	1	1	non-exposed	Han	48	male	Middle school or high school	2	Married/cohabiting	20000~99999	Don't smoke	No	Overweight	95	97	No	No
0	0	0	0	0	0	1	non-exposed	Han	41	male	Middle school or high school	2	Married/cohabiting	20000~99999	Don't smoke	No	Overweight	81	90.5	No	No
1	0	1	0	0	2	1	childhood exposure	Han	67	male	University and above	2	Married/cohabiting	20000~99999	Don't smoke	No	Overweight	83	93	No	No
0	0	0	0	0	0	1	non-exposed	Han	54	male	University and above	2	Married/cohabiting	20000~99999	Don't smoke	No	Overweight	79.5	96	No	No
1	0	2	0	0	3	0	non-exposed	Han	44	male	University and above	2	Married/cohabiting	20000~99999	Don't smoke	No	Overweight	85.3	95	No	No
0	0	0	0	0	0	1	childhood exposure	Han	67	male	Middle school or high school	2	Married/cohabiting	>1000000	Don't smoke	No	Overweight	90	99	Yes	No
0	0	0	0	0	0	1	non-exposed	Han	55	male	Middle school or high school	2	Married/cohabiting	>1000000	Don't smoke	No	Overweight	88	98	No	No
0	0	1	0	0	1	1	childhood exposure	Han	61	male	University and above	2	Married/cohabiting	>1000000	Don't smoke	No	Overweight	94	96	Yes	No
0	0	0	0	0	0	1	non-exposed	Han	53	male	University and above	2	Married/cohabiting	>1000000	Don't smoke	No	Overweight	96	104	Yes	No
0	0	0	0	0	0	1	non-exposed	Han	47	male	University and above	2	Married/cohabiting	>1000000	Don't smoke	No	Overweight	89.5	97	No	No
2	0	2	0	0	4	0	non-exposed	Han	47	male	University and above	2	Married/cohabiting	>1000000	Don't smoke	No	Overweight	84	96.5	No	No
0	0	0	0	0	0	1	non-exposed	Han	50	male	Middle school or high school	3	Married/cohabiting	20000~99999	Don't smoke	No	Overweight	89	97.3	No	No
2	0	2	0	0	4	0	non-exposed	Han	53	male	University and above	3	Married/cohabiting	>1000000	Don't smoke	No	Overweight	78	89.9	No	No
0	0	2	0	0	2	1	non-exposed	Han	44	male	Middle school or high school	1	Separated/divorced	<20000	Don't smoke	No	Overweight	78	93	No	No
2	0	2	0	0	4	0	non-exposed	Han	48	male	Primary school and below	1	Widowed spouse	<20000	Don't smoke	No	Overweight	93.2	92.8	No	No
0	0	0	0	0	0	1	adolescent exposure	Han	74	male	Middle school or high school	1	Widowed spouse	<20000	Don't smoke	No	Overweight	90	94.2	Yes	No
2	0	1	0	0	3	0	non-exposed	Han	56	male	Primary school and below	1	Widowed spouse	20000~99999	Don't smoke	No	Overweight	81.5	98.8	No	No
2	0	2	0	0	4	0	non-exposed	Han	51	male	Primary school and below	1	Widowed spouse	20000~99999	Don't smoke	No	Overweight	88	96	No	No
0	0	0	0	0	0	1	non-exposed	Han	76	male	Primary school and below	1	Married/cohabiting	<20000	Don't smoke	No	Not overweight	65	88	No	No
2	0	2	0	0	4	0	non-exposed	Han	76	male	Primary school and below	1	Married/cohabiting	<20000	Don't smoke	No	Not overweight	64.5	74	No	No
0	0	1	0	0	1	1	adolescent exposure	Han	75	male	Primary school and below	1	Married/cohabiting	<20000	Don't smoke	No	Not overweight	68	79	No	No
0	0	0	0	0	0	1	adolescent exposure	Han	72	male	Primary school and below	1	Married/cohabiting	<20000	Don't smoke	No	Not overweight	79	89	No	No
0	0	0	0	0	0	1	childhood exposure	Han	69	male	Primary school and below	1	Married/cohabiting	<20000	Don't smoke	No	Not overweight	70	87	No	No
2	0	1	0	0	3	0	childhood exposure	Han	68	male	Primary school and below	1	Married/cohabiting	<20000	Don't smoke	No	Not overweight	60	78	No	No
0	0	0	0	0	0	1	childhood exposure	Han	68	male	Primary school and below	1	Married/cohabiting	<20000	Don't smoke	No	Not overweight	68	80.5	No	No
0	0	0	0	0	0	1	childhood exposure	Han	68	male	Primary school and below	1	Married/cohabiting	<20000	Don't smoke	No	Not overweight	95	90	No	No
0	0	0	0	0	0	1	childhood exposure	Han	65	male	Primary school and below	1	Married/cohabiting	<20000	Don't smoke	No	Not overweight	69	84	No	No
2	0	2	0	0	4	0	childhood exposure	Han	63	male	Primary school and below	1	Married/cohabiting	<20000	Don't smoke	No	Not overweight	64	83	Yes	No
1	0	0	0	0	1	1	childhood exposure	Han	63	male	Primary school and below	1	Married/cohabiting	<20000	Don't smoke	No	Not overweight	80	87	No	No
2	0	2	0	0	4	0	childhood exposure	Han	62	male	Primary school and below	1	Married/cohabiting	<20000	Don't smoke	No	Not overweight	67	82	No	No
0	0	0	0	0	0	1	childhood exposure	Han	62	male	Primary school and below	1	Married/cohabiting	<20000	Don't smoke	No	Not overweight	87	94.5	No	No
0	0	0	0	0	0	1	childhood exposure	Han	62	male	Primary school and below	1	Married/cohabiting	<20000	Don't smoke	No	Not overweight	65.2	82.5	No	No
0	0	0	0	0	0	1	childhood exposure	Han	62	male	Primary school and below	1	Married/cohabiting	<20000	Don't smoke	No	Not overweight	65	78	No	No
0	0	0	0	0	0	1	fetal exposure	Han	58	male	Primary school and below	1	Married/cohabiting	<20000	Don't smoke	No	Not overweight	63	84	No	No
0	0	0	0	0	0	1	non-exposed	Han	56	male	Primary school and below	1	Married/cohabiting	<20000	Don't smoke	No	Not overweight	72.5	81.5	No	No
1	0	0	0	0	1	1	non-exposed	Han	55	male	Primary school and below	1	Married/cohabiting	<20000	Don't smoke	No	Not overweight	69	81	No	No
2	0	0	0	0	2	1	non-exposed	Han	54	male	Primary school and below	1	Married/cohabiting	<20000	Don't smoke	No	Not overweight	69.7	89.8	No	No
0	0	0	0	0	0	1	non-exposed	Han	52	male	Primary school and below	1	Married/cohabiting	<20000	Don't smoke	No	Not overweight	71	87	No	No
2	0	2	0	0	4	0	non-exposed	Han	52	male	Primary school and below	1	Married/cohabiting	<20000	Don't smoke	No	Not overweight	68.5	83	No	No
6	1	6	1	1	12	0	non-exposed	Han	51	male	Primary school and below	1	Married/cohabiting	<20000	Don't smoke	No	Not overweight	73.5	88.5	No	No
0	0	0	0	0	0	1	non-exposed	Han	50	male	Primary school and below	1	Married/cohabiting	<20000	Don't smoke	No	Not overweight	67	79.5	No	No
0	0	0	0	0	0	1	non-exposed	Han	49	male	Primary school and below	1	Married/cohabiting	<20000	Don't smoke	No	Not overweight	65	80.5	No	No
0	0	2	0	0	2	1	non-exposed	Han	49	male	Primary school and below	1	Married/cohabiting	<20000	Don't smoke	No	Not overweight	68	85	No	No
2	0	1	0	0	3	0	non-exposed	Han	48	male	Primary school and below	1	Married/cohabiting	<20000	Don't smoke	No	Not overweight	68	84.3	No	No
0	0	0	0	0	0	1	non-exposed	Han	47	male	Primary school and below	1	Married/cohabiting	<20000	Don't smoke	No	Not overweight	70	87.5	No	No
0	0	0	0	0	0	1	non-exposed	Han	46	male	Primary school and below	1	Married/cohabiting	<20000	Don't smoke	No	Not overweight	66	85	No	No
0	0	0	0	0	0	1	non-exposed	Han	43	male	Primary school and below	1	Married/cohabiting	<20000	Don't smoke	No	Not overweight	75.5	94.5	No	No
1	0	2	0	0	3	0	non-exposed	Han	41	male	Primary school and below	1	Married/cohabiting	<20000	Don't smoke	No	Not overweight	66.5	84.5	No	No
0	0	0	0	0	0	1	non-exposed	Han	40	male	Primary school and below	1	Married/cohabiting	<20000	Don't smoke	No	Not overweight	74	85.8	No	No
0	0	0	0	0	0	1	non-exposed	Han	78	male	Middle school or high school	1	Married/cohabiting	<20000	Don't smoke	No	Not overweight	72	87	No	No
3	1	6	1	1	9	0	childhood exposure	Han	69	male	Middle school or high school	1	Married/cohabiting	<20000	Don't smoke	No	Not overweight	68	84	No	No
0	0	0	0	0	0	1	childhood exposure	Han	68	male	Middle school or high school	1	Married/cohabiting	<20000	Don't smoke	No	Not overweight	75	87	No	No
2	0	2	0	0	4	0	childhood exposure	Han	65	male	Middle school or high school	1	Married/cohabiting	<20000	Don't smoke	No	Not overweight	72	88	No	No
3	1	1	0	0	4	0	childhood exposure	Han	64	male	Middle school or high school	1	Married/cohabiting	<20000	Don't smoke	No	Not overweight	75	91	No	No
0	0	0	0	0	0	1	childhood exposure	Han	64	male	Middle school or high school	1	Married/cohabiting	<20000	Don't smoke	No	Not overweight	69	86	No	No
0	0	0	0	0	0	1	childhood exposure	Han	62	male	Middle school or high school	1	Married/cohabiting	<20000	Don't smoke	No	Not overweight	60	76.5	No	No
2	0	0	0	0	2	1	childhood exposure	Han	61	male	Middle school or high school	1	Married/cohabiting	<20000	Don't smoke	No	Not overweight	72	87.5	No	No
0	0	0	0	0	0	1	childhood exposure	Han	60	male	Middle school or high school	1	Married/cohabiting	<20000	Don't smoke	No	Not overweight	73	86.5	No	No
0	0	0	0	0	0	1	fetal exposure	Han	59	male	Middle school or high school	1	Married/cohabiting	<20000	Don't smoke	No	Not overweight	65.3	79.8	No	No
0	0	0	0	0	0	1	fetal exposure	Han	58	male	Middle school or high school	1	Married/cohabiting	<20000	Don't smoke	No	Not overweight	71	85	No	No
0	0	0	0	0	0	1	non-exposed	Han	56	male	Middle school or high school	1	Married/cohabiting	<20000	Don't smoke	No	Not overweight	73	84	No	No
2	0	0	0	0	2	1	non-exposed	Han	56	male	Middle school or high school	1	Married/cohabiting	<20000	Don't smoke	No	Not overweight	67.8	86.5	No	No
1	0	2	0	0	3	0	non-exposed	Han	55	male	Middle school or high school	1	Married/cohabiting	<20000	Don't smoke	No	Not overweight	88.5	89.5	No	No
3	1	0	0	0	3	0	non-exposed	Han	54	male	Middle school or high school	1	Married/cohabiting	<20000	Don't smoke	No	Not overweight	78	90	No	No
0	0	0	0	0	0	1	non-exposed	Han	50	male	Middle school or high school	1	Married/cohabiting	<20000	Don't smoke	No	Not overweight	66	83	No	No
2	0	1	0	0	3	0	non-exposed	Han	48	male	Middle school or high school	1	Married/cohabiting	<20000	Don't smoke	No	Not overweight	80	89	No	No
1	0	0	0	0	1	1	non-exposed	Han	48	male	Middle school or high school	1	Married/cohabiting	<20000	Don't smoke	No	Not overweight	75	86.8	No	No
0	0	0	0	0	0	1	non-exposed	Han	48	male	Middle school or high school	1	Married/cohabiting	<20000	Don't smoke	No	Not overweight	70	89	No	No
0	0	1	0	0	1	1	non-exposed	Han	47	male	Middle school or high school	1	Married/cohabiting	<20000	Don't smoke	No	Not overweight	67	85.5	No	No
0	0	2	0	0	2	1	non-exposed	Han	45	male	Middle school or high school	1	Married/cohabiting	<20000	Don't smoke	No	Not overweight	72	86	No	No
0	0	0	0	0	0	1	non-exposed	Han	45	male	Middle school or high school	1	Married/cohabiting	<20000	Don't smoke	No	Not overweight	71	86	No	No
2	0	1	0	0	3	0	non-exposed	Han	45	male	Middle school or high school	1	Married/cohabiting	<20000	Don't smoke	No	Not overweight	68	80.5	No	No
2	0	2	0	0	4	0	non-exposed	Han	45	male	Middle school or high school	1	Married/cohabiting	<20000	Don't smoke	No	Not overweight	65	87	No	No
4	1	2	0	0	6	0	non-exposed	Han	44	male	Middle school or high school	1	Married/cohabiting	<20000	Don't smoke	No	Not overweight	76	89.5	No	No
0	0	0	0	0	0	1	non-exposed	Han	43	male	Middle school or high school	1	Married/cohabiting	<20000	Don't smoke	No	Not overweight	78	91.5	No	No
3	1	0	0	0	3	0	non-exposed	Han	79	male	Primary school and below	1	Married/cohabiting	20000~99999	Don't smoke	No	Not overweight	78	83	No	No
2	0	2	0	0	4	0	adolescent exposure	Han	75	male	Primary school and below	1	Married/cohabiting	20000~99999	Don't smoke	No	Not overweight	68	79	No	No
0	0	0	0	0	0	1	adolescent exposure	Han	73	male	Primary school and below	1	Married/cohabiting	20000~99999	Don't smoke	No	Not overweight	81.5	83	Yes	No
0	0	0	0	0	0	1	adolescent exposure	Han	72	male	Primary school and below	1	Married/cohabiting	20000~99999	Don't smoke	No	Not overweight	68	84	No	No
0	0	0	0	0	0	1	adolescent exposure	Han	70	male	Primary school and below	1	Married/cohabiting	20000~99999	Don't smoke	No	Not overweight	79	91	Yes	No
2	0	1	0	0	3	0	childhood exposure	Han	67	male	Primary school and below	1	Married/cohabiting	20000~99999	Don't smoke	No	Not overweight	78.5	86	Yes	No
0	0	0	0	0	0	1	childhood exposure	Han	63	male	Primary school and below	1	Married/cohabiting	20000~99999	Don't smoke	No	Not overweight	68	83	Yes	No
0	0	0	0	0	0	1	childhood exposure	Han	63	male	Primary school and below	1	Married/cohabiting	20000~99999	Don't smoke	No	Not overweight	71.2	89.4	No	No
2	0	2	0	0	4	0	fetal exposure	Han	59	male	Primary school and below	1	Married/cohabiting	20000~99999	Don't smoke	No	Not overweight	72	92	No	No
0	0	0	0	0	0	1	non-exposed	Han	54	male	Primary school and below	1	Married/cohabiting	20000~99999	Don't smoke	No	Not overweight	69	82	No	No
3	1	2	0	0	5	0	non-exposed	Han	53	male	Primary school and below	1	Married/cohabiting	20000~99999	Don't smoke	No	Not overweight	77	88	No	No
2	0	2	0	0	4	0	non-exposed	Han	53	male	Primary school and below	1	Married/cohabiting	20000~99999	Don't smoke	No	Not overweight	72	81	No	No
0	0	2	0	0	2	1	non-exposed	Han	52	male	Primary school and below	1	Married/cohabiting	20000~99999	Don't smoke	No	Not overweight	74	91.5	No	No
2	0	2	0	0	4	0	non-exposed	Han	52	male	Primary school and below	1	Married/cohabiting	20000~99999	Don't smoke	No	Not overweight	61	80	No	No
0	0	0	0	0	0	1	non-exposed	Han	52	male	Primary school and below	1	Married/cohabiting	20000~99999	Don't smoke	No	Not overweight	75	90	No	No
0	0	0	0	0	0	1	non-exposed	Han	51	male	Primary school and below	1	Married/cohabiting	20000~99999	Don't smoke	No	Not overweight	74	84	No	No
0	0	0	0	0	0	1	non-exposed	Han	50	male	Primary school and below	1	Married/cohabiting	20000~99999	Don't smoke	No	Not overweight	78	91	No	No
2	0	2	0	0	4	0	non-exposed	Han	50	male	Primary school and below	1	Married/cohabiting	20000~99999	Don't smoke	No	Not overweight	77	88.5	No	No
0	0	0	0	0	0	1	non-exposed	Han	49	male	Primary school and below	1	Married/cohabiting	20000~99999	Don't smoke	No	Not overweight	62	84	No	No
0	0	0	0	0	0	1	non-exposed	Han	49	male	Primary school and below	1	Married/cohabiting	20000~99999	Don't smoke	No	Not overweight	68	87	No	No
0	0	0	0	0	0	1	non-exposed	Han	48	male	Primary school and below	1	Married/cohabiting	20000~99999	Don't smoke	No	Not overweight	71	78	No	No
4	1	1	0	0	5	0	non-exposed	Han	46	male	Primary school and below	1	Married/cohabiting	20000~99999	Don't smoke	No	Not overweight	62	76	No	No
0	0	0	0	0	0	1	non-exposed	Han	46	male	Primary school and below	1	Married/cohabiting	20000~99999	Don't smoke	No	Not overweight	74	90	No	No
0	0	0	0	0	0	1	non-exposed	Han	46	male	Primary school and below	1	Married/cohabiting	20000~99999	Don't smoke	No	Not overweight	85	91.2	No	No
0	0	1	0	0	1	1	non-exposed	Han	46	male	Primary school and below	1	Married/cohabiting	20000~99999	Don't smoke	No	Not overweight	70	88	No	No
2	0	2	0	0	4	0	non-exposed	Han	46	male	Primary school and below	1	Married/cohabiting	20000~99999	Don't smoke	No	Not overweight	69	82	No	No
0	0	0	0	0	0	1	non-exposed	Han	45	male	Primary school and below	1	Married/cohabiting	20000~99999	Don't smoke	No	Not overweight	80.5	97	No	No
1	0	2	0	0	3	0	non-exposed	Han	44	male	Primary school and below	1	Married/cohabiting	20000~99999	Don't smoke	No	Not overweight	71	89	No	No
0	0	0	0	0	0	1	non-exposed	Han	44	male	Primary school and below	1	Married/cohabiting	20000~99999	Don't smoke	No	Not overweight	72	86	No	No
1	0	0	0	0	1	1	non-exposed	Han	44	male	Primary school and below	1	Married/cohabiting	20000~99999	Don't smoke	No	Not overweight	73	91	No	No
2	0	2	0	0	4	0	non-exposed	Han	43	male	Primary school and below	1	Married/cohabiting	20000~99999	Don't smoke	No	Not overweight	70	93.1	No	No
1	0	2	0	0	3	0	non-exposed	Han	42	male	Primary school and below	1	Married/cohabiting	20000~99999	Don't smoke	No	Not overweight	62.3	80.3	No	No
0	0	0	0	0	0	1	non-exposed	Han	41	male	Primary school and below	1	Married/cohabiting	20000~99999	Don't smoke	No	Not overweight	60	77	No	No
1	0	0	0	0	1	1	non-exposed	Han	41	male	Primary school and below	1	Married/cohabiting	20000~99999	Don't smoke	No	Not overweight	74.2	84.1	No	No
0	0	0	0	0	0	1	childhood exposure	Han	69	male	Middle school or high school	1	Married/cohabiting	20000~99999	Don't smoke	No	Not overweight	74	86.1	Yes	No
0	0	0	0	0	0	1	childhood exposure	Han	67	male	Middle school or high school	1	Married/cohabiting	20000~99999	Don't smoke	No	Not overweight	70	84	No	No
1	0	0	0	0	1	1	childhood exposure	Han	66	male	Middle school or high school	1	Married/cohabiting	20000~99999	Don't smoke	No	Not overweight	68	83	No	No
2	0	2	0	0	4	0	childhood exposure	Han	64	male	Middle school or high school	1	Married/cohabiting	20000~99999	Don't smoke	No	Not overweight	83.5	95.6	No	No
2	0	2	0	0	4	0	childhood exposure	Han	64	male	Middle school or high school	1	Married/cohabiting	20000~99999	Don't smoke	No	Not overweight	73	84.5	Yes	No
0	0	2	0	0	2	1	fetal exposure	Han	59	male	Middle school or high school	1	Married/cohabiting	20000~99999	Don't smoke	No	Not overweight	77	85	No	No
0	0	0	0	0	0	1	fetal exposure	Han	59	male	Middle school or high school	1	Married/cohabiting	20000~99999	Don't smoke	No	Not overweight	73	90	No	No
0	0	0	0	0	0	1	non-exposed	Han	56	male	Middle school or high school	1	Married/cohabiting	20000~99999	Don't smoke	No	Not overweight	66	80	No	No
0	0	0	0	0	0	1	non-exposed	Han	56	male	Middle school or high school	1	Married/cohabiting	20000~99999	Don't smoke	No	Not overweight	67	83	No	No
0	0	0	0	0	0	1	non-exposed	Han	55	male	Middle school or high school	1	Married/cohabiting	20000~99999	Don't smoke	No	Not overweight	72	83	No	No
0	0	0	0	0	0	1	non-exposed	Han	55	male	Middle school or high school	1	Married/cohabiting	20000~99999	Don't smoke	No	Not overweight	68	84	No	No
0	0	1	0	0	1	1	non-exposed	Han	54	male	Middle school or high school	1	Married/cohabiting	20000~99999	Don't smoke	No	Not overweight	68	93	No	No
2	0	2	0	0	4	0	non-exposed	Han	54	male	Middle school or high school	1	Married/cohabiting	20000~99999	Don't smoke	No	Not overweight	67.2	83	No	No
0	0	2	0	0	2	1	non-exposed	Han	54	male	Middle school or high school	1	Married/cohabiting	20000~99999	Don't smoke	No	Not overweight	70	83	No	No
0	0	0	0	0	0	1	non-exposed	Han	54	male	Middle school or high school	1	Married/cohabiting	20000~99999	Don't smoke	No	Not overweight	68.5	82.5	No	No
0	0	0	0	0	0	1	non-exposed	Han	53	male	Middle school or high school	1	Married/cohabiting	20000~99999	Don't smoke	No	Not overweight	81	87	No	No
0	0	0	0	0	0	1	non-exposed	Han	53	male	Middle school or high school	1	Married/cohabiting	20000~99999	Don't smoke	No	Not overweight	70.5	83	No	No
2	0	2	0	0	4	0	non-exposed	Han	53	male	Middle school or high school	1	Married/cohabiting	20000~99999	Don't smoke	No	Not overweight	68	78	No	No
0	0	0	0	0	0	1	non-exposed	Han	53	male	Middle school or high school	1	Married/cohabiting	20000~99999	Don't smoke	No	Not overweight	76	90	No	No
0	0	1	0	0	1	1	non-exposed	Han	51	male	Middle school or high school	1	Married/cohabiting	20000~99999	Don't smoke	No	Not overweight	71.8	89	No	No
2	0	1	0	0	3	0	non-exposed	Han	50	male	Middle school or high school	1	Married/cohabiting	20000~99999	Don't smoke	No	Not overweight	82	88	No	No
0	0	0	0	0	0	1	non-exposed	Han	49	male	Middle school or high school	1	Married/cohabiting	20000~99999	Don't smoke	No	Not overweight	71	89.5	No	No
0	0	0	0	0	0	1	non-exposed	Han	49	male	Middle school or high school	1	Married/cohabiting	20000~99999	Don't smoke	No	Not overweight	83	88	No	No
0	0	0	0	0	0	1	non-exposed	Han	47	male	Middle school or high school	1	Married/cohabiting	20000~99999	Don't smoke	No	Not overweight	73	90	No	No
0	0	0	0	0	0	1	non-exposed	Han	46	male	Middle school or high school	1	Married/cohabiting	20000~99999	Don't smoke	No	Not overweight	64	82	No	No
0	0	0	0	0	0	1	non-exposed	Han	46	male	Middle school or high school	1	Married/cohabiting	20000~99999	Don't smoke	No	Not overweight	72.5	86.5	No	No
0	0	0	0	0	0	1	non-exposed	Han	46	male	Middle school or high school	1	Married/cohabiting	20000~99999	Don't smoke	No	Not overweight	66	81	No	No
2	0	3	1	0	5	0	non-exposed	Han	45	male	Middle school or high school	1	Married/cohabiting	20000~99999	Don't smoke	No	Not overweight	76.8	89.8	No	No
0	0	0	0	0	0	1	non-exposed	Han	44	male	Middle school or high school	1	Married/cohabiting	20000~99999	Don't smoke	No	Not overweight	69	81	No	No
0	0	0	0	0	0	1	non-exposed	Han	44	male	Middle school or high school	1	Married/cohabiting	20000~99999	Don't smoke	No	Not overweight	68.5	78.5	No	No
0	0	0	0	0	0	1	non-exposed	Han	43	male	Middle school or high school	1	Married/cohabiting	20000~99999	Don't smoke	No	Not overweight	62.2	83.2	No	No
0	0	0	0	0	0	1	non-exposed	Han	43	male	Middle school or high school	1	Married/cohabiting	20000~99999	Don't smoke	No	Not overweight	77	85.5	No	No
0	0	0	0	0	0	1	non-exposed	Han	43	male	Middle school or high school	1	Married/cohabiting	20000~99999	Don't smoke	No	Not overweight	77	88	No	No
0	0	0	0	0	0	1	non-exposed	Han	42	male	Middle school or high school	1	Married/cohabiting	20000~99999	Don't smoke	No	Not overweight	70	88	No	No
0	0	0	0	0	0	1	non-exposed	Han	42	male	Middle school or high school	1	Married/cohabiting	20000~99999	Don't smoke	No	Not overweight	67	88	No	No
0	0	0	0	0	0	1	non-exposed	Han	42	male	Middle school or high school	1	Married/cohabiting	20000~99999	Don't smoke	No	Not overweight	73.7	91.5	No	No
2	0	2	0	0	4	0	non-exposed	Han	42	male	Middle school or high school	1	Married/cohabiting	20000~99999	Don't smoke	No	Not overweight	68	83.5	No	No
1	0	2	0	0	3	0	non-exposed	Han	41	male	Middle school or high school	1	Married/cohabiting	20000~99999	Don't smoke	No	Not overweight	75	92.5	No	No
0	0	0	0	0	0	1	non-exposed	Han	41	male	Middle school or high school	1	Married/cohabiting	20000~99999	Don't smoke	No	Not overweight	75	85.5	No	No
0	0	1	0	0	1	1	non-exposed	Han	51	male	Primary school and below	1	Married/cohabiting	>1000000	Don't smoke	No	Not overweight	84	93.7	No	No
0	0	0	0	0	0	1	non-exposed	Han	46	male	Middle school or high school	1	Married/cohabiting	>1000000	Don't smoke	No	Not overweight	70	88	No	No
2	0	3	1	0	5	0	childhood exposure	Han	67	male	Primary school and below	2	Married/cohabiting	<20000	Don't smoke	No	Not overweight	63	82	No	No
2	0	1	0	0	3	0	childhood exposure	Han	67	male	Primary school and below	2	Married/cohabiting	<20000	Don't smoke	No	Not overweight	72.5	83	No	No
2	0	2	0	0	4	0	childhood exposure	Han	68	male	Middle school or high school	2	Married/cohabiting	<20000	Don't smoke	No	Not overweight	70	86	Yes	No
3	1	0	0	0	0	1	fetal exposure	Han	58	male	Middle school or high school	2	Married/cohabiting	<20000	Don't smoke	No	Not overweight	67.2	85.7	Yes	No
2	0	2	0	0	4	0	non-exposed	Han	52	male	Middle school or high school	2	Married/cohabiting	<20000	Don't smoke	No	Not overweight	78.5	92.5	No	No
2	0	0	0	0	2	1	adolescent exposure	Han	70	male	Middle school or high school	2	Married/cohabiting	20000~99999	Don't smoke	No	Not overweight	69	87	No	No
0	0	0	0	0	0	1	adolescent exposure	Han	70	male	Middle school or high school	2	Married/cohabiting	20000~99999	Don't smoke	No	Not overweight	90	85	No	No
0	0	0	0	0	0	1	childhood exposure	Han	67	male	Middle school or high school	2	Married/cohabiting	20000~99999	Don't smoke	No	Not overweight	77	87	Yes	No
0	0	0	0	0	0	1	non-exposed	Han	48	male	Middle school or high school	2	Married/cohabiting	20000~99999	Don't smoke	No	Not overweight	70.5	90.5	No	No
2	0	1	0	0	3	0	adolescent exposure	Han	71	male	University and above	2	Married/cohabiting	20000~99999	Don't smoke	No	Not overweight	82	87	No	No
2	0	0	0	0	2	1	fetal exposure	Han	59	male	University and above	2	Married/cohabiting	20000~99999	Don't smoke	No	Not overweight	87	91	No	No
1	0	1	0	0	2	1	non-exposed	Han	50	male	University and above	2	Married/cohabiting	20000~99999	Don't smoke	No	Not overweight	87	96	No	No
0	0	0	0	0	0	1	non-exposed	Han	42	male	Middle school or high school	2	Married/cohabiting	>1000000	Don't smoke	No	Not overweight	76	80	No	No
0	0	0	0	0	0	1	non-exposed	Han	48	male	University and above	2	Married/cohabiting	>1000000	Don't smoke	No	Not overweight	77	93	No	No
0	0	0	0	0	0	1	non-exposed	Han	48	male	University and above	2	Married/cohabiting	>1000000	Don't smoke	No	Not overweight	71.1	91.2	No	No
0	0	0	0	0	0	1	non-exposed	Han	46	male	University and above	2	Married/cohabiting	>1000000	Don't smoke	No	Not overweight	76.2	99.1	No	No
1	0	1	0	0	2	1	adolescent exposure	Han	74	male	Middle school or high school	3	Married/cohabiting	<20000	Don't smoke	No	Not overweight	83	87	No	No
0	0	0	0	0	0	1	childhood exposure	Han	62	male	Middle school or high school	3	Married/cohabiting	20000~99999	Don't smoke	No	Not overweight	73	90	No	No
0	0	0	0	0	0	1	non-exposed	Han	52	male	University and above	3	Married/cohabiting	>1000000	Don't smoke	No	Not overweight	86.5	95.5	No	No
2	0	2	0	0	4	0	non-exposed	Han	44	male	Middle school or high school	1	Separated/divorced	<20000	Don't smoke	No	Not overweight	72	84	No	No
0	0	0	0	0	0	1	adolescent exposure	Han	71	male	Primary school and below	1	Separated/divorced	20000~99999	Don't smoke	No	Not overweight	68	78	Yes	No
1	0	1	0	0	2	1	non-exposed	Han	41	male	Middle school or high school	1	Separated/divorced	20000~99999	Don't smoke	No	Not overweight	73.2	93.5	No	No
1	0	0	0	0	1	1	adolescent exposure	Han	71	male	Primary school and below	1	Widowed spouse	<20000	Don't smoke	No	Not overweight	79.4	86.8	No	No
1	0	0	0	0	1	1	adolescent exposure	Han	71	male	Primary school and below	1	Widowed spouse	<20000	Don't smoke	No	Not overweight	79	92	Yes	No
2	0	2	0	0	4	0	childhood exposure	Han	66	male	Primary school and below	1	Widowed spouse	<20000	Don't smoke	No	Not overweight	67	82.7	Yes	No
0	0	0	0	0	0	1	childhood exposure	Han	64	male	Middle school or high school	1	Widowed spouse	<20000	Don't smoke	No	Not overweight	66.5	84	Yes	No
0	0	0	0	0	0	1	childhood exposure	Han	62	male	Primary school and below	1	Widowed spouse	20000~99999	Don't smoke	No	Not overweight	68	85.5	No	No
1	0	2	0	0	3	0	non-exposed	Han	54	male	Primary school and below	1	Widowed spouse	20000~99999	Don't smoke	No	Not overweight	69	86	No	No
0	0	0	0	0	0	1	adolescent exposure	Han	73	male	Middle school or high school	1	Widowed spouse	20000~99999	Don't smoke	No	Not overweight	61	76	No	No
2	0	2	0	0	4	0	non-exposed	Han	76	male	Middle school or high school	2	Widowed spouse	20000~99999	Don't smoke	No	Not overweight	83	87	Yes	No
0	0	0	0	0	0	1	non-exposed	Han	42	male	Middle school or high school	1	Never married	20000~99999	Don't smoke	No	Not overweight	63	81	No	No
0	0	0	0	0	0	1	childhood exposure	Han	66	male	Primary school and below	1	Married/cohabiting	<20000	Current smoking	Yes	Overweight	101	98	Yes	Yes
3	1	0	0	0	3	0	childhood exposure	Han	64	male	Primary school and below	1	Married/cohabiting	<20000	Current smoking	Yes	Overweight	81.5	81	Yes	Yes
0	0	0	0	0	0	1	fetal exposure	Han	59	male	Primary school and below	1	Married/cohabiting	<20000	Current smoking	Yes	Overweight	107	100	Yes	No
2	0	0	0	0	2	1	non-exposed	Han	53	male	Primary school and below	1	Married/cohabiting	<20000	Current smoking	Yes	Overweight	95	100.2	No	No
0	0	0	0	0	0	1	non-exposed	Han	52	male	Primary school and below	1	Married/cohabiting	<20000	Current smoking	Yes	Overweight	96	100	Yes	No
0	0	1	0	0	1	1	non-exposed	Han	56	male	Middle school or high school	1	Married/cohabiting	<20000	Current smoking	Yes	Overweight	84.5	93	No	No
0	0	0	0	0	0	1	childhood exposure	Han	61	male	Primary school and below	1	Married/cohabiting	20000~99999	Current smoking	Yes	Overweight	85.7	88	Yes	Yes
0	0	1	0	0	1	1	fetal exposure	Han	58	male	Primary school and below	1	Married/cohabiting	20000~99999	Current smoking	Yes	Overweight	90	95	No	No
0	0	0	0	0	0	1	non-exposed	Han	54	male	Primary school and below	1	Married/cohabiting	20000~99999	Current smoking	Yes	Overweight	89	90	No	No
0	0	0	0	0	0	1	non-exposed	Han	50	male	Primary school and below	1	Married/cohabiting	20000~99999	Current smoking	Yes	Overweight	95	103	Yes	Yes
1	0	1	0	0	2	1	childhood exposure	Han	64	male	Middle school or high school	1	Married/cohabiting	20000~99999	Current smoking	Yes	Overweight	99	105.7	No	No
0	0	0	0	0	0	1	non-exposed	Han	54	male	Middle school or high school	1	Married/cohabiting	20000~99999	Current smoking	Yes	Overweight	89	97	No	No
0	0	0	0	0	0	1	non-exposed	Han	53	male	Middle school or high school	1	Married/cohabiting	>1000000	Current smoking	Yes	Overweight	97	104	No	No
0	0	0	0	0	0	1	childhood exposure	Han	69	male	Middle school or high school	2	Married/cohabiting	<20000	Current smoking	Yes	Overweight	99	101	Yes	No
1	0	0	0	0	1	1	childhood exposure	Han	66	male	Middle school or high school	2	Married/cohabiting	20000~99999	Current smoking	Yes	Overweight	82	94	No	No
0	0	0	0	0	0	1	adolescent exposure	Han	70	male	Primary school and below	1	Married/cohabiting	<20000	Current smoking	Yes	Not overweight	65	80	Yes	No
2	0	2	0	0	4	0	childhood exposure	Han	66	male	Primary school and below	1	Married/cohabiting	<20000	Current smoking	Yes	Not overweight	77	91.5	No	No
1	0	0	0	0	1	1	childhood exposure	Han	61	male	Primary school and below	1	Married/cohabiting	<20000	Current smoking	Yes	Not overweight	71	87	No	Yes
1	0	1	0	0	2	1	fetal exposure	Han	58	male	Primary school and below	1	Married/cohabiting	<20000	Current smoking	Yes	Not overweight	77	78	No	No
0	0	0	0	0	0	1	non-exposed	Han	51	male	Primary school and below	1	Married/cohabiting	<20000	Current smoking	Yes	Not overweight	82	91.2	No	No
0	0	2	0	0	2	1	childhood exposure	Han	64	male	Middle school or high school	1	Married/cohabiting	<20000	Current smoking	Yes	Not overweight	78.2	90.7	Yes	No
0	0	1	0	0	1	1	childhood exposure	Han	61	male	Middle school or high school	1	Married/cohabiting	<20000	Current smoking	Yes	Not overweight	81.5	92.5	Yes	No
4	1	0	0	0	4	0	non-exposed	Han	54	male	Middle school or high school	1	Married/cohabiting	<20000	Current smoking	Yes	Not overweight	84	86	No	Yes
2	0	2	0	0	4	0	adolescent exposure	Han	72	male	Primary school and below	1	Married/cohabiting	20000~99999	Current smoking	Yes	Not overweight	69	86.5	Yes	No
0	0	0	0	0	0	1	childhood exposure	Han	66	male	Primary school and below	1	Married/cohabiting	20000~99999	Current smoking	Yes	Not overweight	80	88	Yes	No
2	0	2	0	0	4	0	childhood exposure	Han	62	male	Primary school and below	1	Married/cohabiting	20000~99999	Current smoking	Yes	Not overweight	71	78	Yes	No
0	0	0	0	0	0	1	non-exposed	Han	56	male	Primary school and below	1	Married/cohabiting	20000~99999	Current smoking	Yes	Not overweight	79	84	Yes	No
0	0	0	0	0	0	1	non-exposed	Han	56	male	Primary school and below	1	Married/cohabiting	20000~99999	Current smoking	Yes	Not overweight	72	82	No	Yes
0	0	0	0	0	0	1	non-exposed	Han	55	male	Primary school and below	1	Married/cohabiting	20000~99999	Current smoking	Yes	Not overweight	87.5	93.4	No	No
0	0	0	0	0	0	1	non-exposed	Han	52	male	Primary school and below	1	Married/cohabiting	20000~99999	Current smoking	Yes	Not overweight	65	78	Yes	No
0	0	0	0	0	0	1	non-exposed	Han	48	male	Middle school or high school	1	Married/cohabiting	20000~99999	Current smoking	Yes	Not overweight	81	90	No	No
2	0	1	0	0	3	0	non-exposed	Han	45	male	Middle school or high school	1	Married/cohabiting	20000~99999	Current smoking	Yes	Not overweight	86	90	Yes	No
1	0	0	0	0	1	1	adolescent exposure	Han	72	male	Primary school and below	1	Married/cohabiting	<20000	Current smoking	Yes	Overweight	83	91	No	No
0	0	0	0	0	0	1	childhood exposure	Han	67	male	Primary school and below	1	Married/cohabiting	<20000	Current smoking	Yes	Overweight	76	95	Yes	No
1	0	0	0	0	1	1	childhood exposure	Han	66	male	Primary school and below	1	Married/cohabiting	<20000	Current smoking	Yes	Overweight	85.5	91.5	Yes	No
0	0	2	0	0	2	1	childhood exposure	Han	65	male	Primary school and below	1	Married/cohabiting	<20000	Current smoking	Yes	Overweight	78	88	No	No
0	0	0	0	0	0	1	childhood exposure	Han	64	male	Primary school and below	1	Married/cohabiting	<20000	Current smoking	Yes	Overweight	77	92	No	No
0	0	0	0	0	0	1	childhood exposure	Han	62	male	Primary school and below	1	Married/cohabiting	<20000	Current smoking	Yes	Overweight	76	90	Yes	No
0	0	0	0	0	0	1	childhood exposure	Han	61	male	Primary school and below	1	Married/cohabiting	<20000	Current smoking	Yes	Overweight	74	85	No	No
1	0	0	0	0	1	1	fetal exposure	Han	59	male	Primary school and below	1	Married/cohabiting	<20000	Current smoking	Yes	Overweight	90.5	96	No	No
0	0	0	0	0	0	1	fetal exposure	Han	58	male	Primary school and below	1	Married/cohabiting	<20000	Current smoking	Yes	Overweight	84	90	No	No
0	0	0	0	0	0	1	non-exposed	Han	55	male	Primary school and below	1	Married/cohabiting	<20000	Current smoking	Yes	Overweight	92	93	No	No
0	0	0	0	0	0	1	non-exposed	Han	55	male	Primary school and below	1	Married/cohabiting	<20000	Current smoking	Yes	Overweight	76	87	No	No
0	0	0	0	0	0	1	non-exposed	Han	55	male	Primary school and below	1	Married/cohabiting	<20000	Current smoking	Yes	Overweight	80.3	90.5	Yes	No
0	0	0	0	0	0	1	non-exposed	Han	55	male	Primary school and below	1	Married/cohabiting	<20000	Current smoking	Yes	Overweight	81	94.5	No	No
2	0	1	0	0	3	0	non-exposed	Han	54	male	Primary school and below	1	Married/cohabiting	<20000	Current smoking	Yes	Overweight	81.5	91.5	Yes	No
0	0	1	0	0	1	1	non-exposed	Han	54	male	Primary school and below	1	Married/cohabiting	<20000	Current smoking	Yes	Overweight	93.2	95.6	Yes	No
2	0	2	0	0	4	0	non-exposed	Han	53	male	Primary school and below	1	Married/cohabiting	<20000	Current smoking	Yes	Overweight	78	89	No	No
0	0	0	0	0	0	1	non-exposed	Han	52	male	Primary school and below	1	Married/cohabiting	<20000	Current smoking	Yes	Overweight	90.5	94.5	No	No
2	0	2	0	0	4	0	non-exposed	Han	51	male	Primary school and below	1	Married/cohabiting	<20000	Current smoking	Yes	Overweight	82	90.5	Yes	No
0	0	0	0	0	0	1	non-exposed	Han	50	male	Primary school and below	1	Married/cohabiting	<20000	Current smoking	Yes	Overweight	90	95	No	No
2	0	1	0	0	3	0	non-exposed	Han	50	male	Primary school and below	1	Married/cohabiting	<20000	Current smoking	Yes	Overweight	92	97	No	No
0	0	0	0	0	0	1	non-exposed	Han	49	male	Primary school and below	1	Married/cohabiting	<20000	Current smoking	Yes	Overweight	97	97	No	No
0	0	1	0	0	1	1	non-exposed	Han	49	male	Primary school and below	1	Married/cohabiting	<20000	Current smoking	Yes	Overweight	105	100	Yes	No
2	0	2	0	0	4	0	non-exposed	Han	48	male	Primary school and below	1	Married/cohabiting	<20000	Current smoking	Yes	Overweight	88	95.4	Yes	No
0	0	1	0	0	1	1	non-exposed	Han	46	male	Primary school and below	1	Married/cohabiting	<20000	Current smoking	Yes	Overweight	73.2	84.6	No	No
0	0	0	0	0	0	1	non-exposed	Han	41	male	Primary school and below	1	Married/cohabiting	<20000	Current smoking	Yes	Overweight	89.2	94.4	No	No
2	0	2	0	0	4	0	childhood exposure	Han	63	male	Middle school or high school	1	Married/cohabiting	<20000	Current smoking	Yes	Overweight	84.2	88.3	No	No
0	0	0	0	0	0	1	childhood exposure	Han	63	male	Middle school or high school	1	Married/cohabiting	<20000	Current smoking	Yes	Overweight	86	96.3	Yes	No
1	0	0	0	0	0	1	fetal exposure	Han	59	male	Middle school or high school	1	Married/cohabiting	<20000	Current smoking	Yes	Overweight	86.7	89.9	No	No
0	0	0	0	0	0	1	non-exposed	Han	56	male	Middle school or high school	1	Married/cohabiting	<20000	Current smoking	Yes	Overweight	88	93	No	No
0	0	2	0	0	2	1	non-exposed	Han	56	male	Middle school or high school	1	Married/cohabiting	<20000	Current smoking	Yes	Overweight	96	96	No	No
2	0	0	0	0	2	1	non-exposed	Han	48	male	Middle school or high school	1	Married/cohabiting	<20000	Current smoking	Yes	Overweight	85	95.6	Yes	No
1	0	0	0	0	1	1	non-exposed	Han	47	male	Middle school or high school	1	Married/cohabiting	<20000	Current smoking	Yes	Overweight	82.1	88	Yes	No
0	0	0	0	0	0	1	non-exposed	Han	46	male	Middle school or high school	1	Married/cohabiting	<20000	Current smoking	Yes	Overweight	87	90	Yes	No
0	0	0	0	0	0	1	non-exposed	Han	42	male	Middle school or high school	1	Married/cohabiting	<20000	Current smoking	Yes	Overweight	84.3	89.5	No	No
2	0	0	0	0	2	1	childhood exposure	Han	65	male	Primary school and below	1	Married/cohabiting	20000~99999	Current smoking	Yes	Overweight	88	96	No	No
0	0	0	0	0	0	1	childhood exposure	Han	63	male	Primary school and below	1	Married/cohabiting	20000~99999	Current smoking	Yes	Overweight	86	88	Yes	No
4	1	3	1	1	0	1	fetal exposure	Han	59	male	Primary school and below	1	Married/cohabiting	20000~99999	Current smoking	Yes	Overweight	100	90	Yes	No
2	0	1	0	0	3	0	fetal exposure	Han	58	male	Primary school and below	1	Married/cohabiting	20000~99999	Current smoking	Yes	Overweight	84.5	92	Yes	No
0	0	0	0	0	0	1	non-exposed	Han	52	male	Primary school and below	1	Married/cohabiting	20000~99999	Current smoking	Yes	Overweight	83	92	Yes	No
1	0	1	0	0	2	1	non-exposed	Han	52	male	Primary school and below	1	Married/cohabiting	20000~99999	Current smoking	Yes	Overweight	88.5	92	Yes	No
0	0	2	0	0	2	1	non-exposed	Han	51	male	Primary school and below	1	Married/cohabiting	20000~99999	Current smoking	Yes	Overweight	91	99	No	No
2	0	1	0	0	3	0	non-exposed	Han	49	male	Primary school and below	1	Married/cohabiting	20000~99999	Current smoking	Yes	Overweight	95	98	No	No
1	0	0	0	0	1	1	non-exposed	Han	49	male	Primary school and below	1	Married/cohabiting	20000~99999	Current smoking	Yes	Overweight	108.4	107.5	No	No
2	0	1	0	0	3	0	non-exposed	Han	49	male	Primary school and below	1	Married/cohabiting	20000~99999	Current smoking	Yes	Overweight	104	103	No	No
1	0	2	0	0	3	0	non-exposed	Han	49	male	Primary school and below	1	Married/cohabiting	20000~99999	Current smoking	Yes	Overweight	94	100	No	No
0	0	0	0	0	0	1	non-exposed	Han	49	male	Primary school and below	1	Married/cohabiting	20000~99999	Current smoking	Yes	Overweight	92	94.5	No	No
0	0	0	0	0	0	1	non-exposed	Han	48	male	Primary school and below	1	Married/cohabiting	20000~99999	Current smoking	Yes	Overweight	80	92	No	No
0	0	0	0	0	0	1	non-exposed	Han	47	male	Primary school and below	1	Married/cohabiting	20000~99999	Current smoking	Yes	Overweight	85.5	102.5	No	No
0	0	0	0	0	0	1	non-exposed	Han	45	male	Primary school and below	1	Married/cohabiting	20000~99999	Current smoking	Yes	Overweight	88	93	No	No
2	0	1	0	0	3	0	non-exposed	Han	44	male	Primary school and below	1	Married/cohabiting	20000~99999	Current smoking	Yes	Overweight	84	98	No	No
0	0	0	0	0	0	1	non-exposed	Han	43	male	Primary school and below	1	Married/cohabiting	20000~99999	Current smoking	Yes	Overweight	83.5	93.5	No	No
0	0	2	0	0	2	1	non-exposed	Han	43	male	Primary school and below	1	Married/cohabiting	20000~99999	Current smoking	Yes	Overweight	92.5	96	No	No
0	0	0	0	0	0	1	non-exposed	Han	43	male	Primary school and below	1	Married/cohabiting	20000~99999	Current smoking	Yes	Overweight	87.5	98.5	No	No
0	0	0	0	0	0	1	adolescent exposure	Han	72	male	Middle school or high school	1	Married/cohabiting	20000~99999	Current smoking	Yes	Overweight	78	85	No	No
0	0	0	0	0	0	1	childhood exposure	Han	64	male	Middle school or high school	1	Married/cohabiting	20000~99999	Current smoking	Yes	Overweight	90	97	No	No
0	0	0	0	0	0	1	childhood exposure	Han	63	male	Middle school or high school	1	Married/cohabiting	20000~99999	Current smoking	Yes	Overweight	83	88	Yes	No
3	1	1	0	0	4	0	childhood exposure	Han	62	male	Middle school or high school	1	Married/cohabiting	20000~99999	Current smoking	Yes	Overweight	88	95	No	No
0	0	1	0	0	1	1	fetal exposure	Han	59	male	Middle school or high school	1	Married/cohabiting	20000~99999	Current smoking	Yes	Overweight	80	88.5	Yes	No
0	0	0	0	0	0	1	fetal exposure	Han	58	male	Middle school or high school	1	Married/cohabiting	20000~99999	Current smoking	Yes	Overweight	85	95	No	No
0	0	0	0	0	0	1	non-exposed	Han	56	male	Middle school or high school	1	Married/cohabiting	20000~99999	Current smoking	Yes	Overweight	86.3	92	No	No
0	0	0	0	0	0	1	non-exposed	Han	54	male	Middle school or high school	1	Married/cohabiting	20000~99999	Current smoking	Yes	Overweight	78.5	91.5	Yes	No
2	0	0	0	0	2	1	non-exposed	Han	54	male	Middle school or high school	1	Married/cohabiting	20000~99999	Current smoking	Yes	Overweight	89	91	No	No
0	0	1	0	0	1	1	non-exposed	Han	54	male	Middle school or high school	1	Married/cohabiting	20000~99999	Current smoking	Yes	Overweight	92	99	Yes	No
0	0	0	0	0	0	1	non-exposed	Han	54	male	Middle school or high school	1	Married/cohabiting	20000~99999	Current smoking	Yes	Overweight	89	97	No	No
0	0	2	0	0	2	1	non-exposed	Han	53	male	Middle school or high school	1	Married/cohabiting	20000~99999	Current smoking	Yes	Overweight	89	94	No	No
1	0	0	0	0	1	1	non-exposed	Han	53	male	Middle school or high school	1	Married/cohabiting	20000~99999	Current smoking	Yes	Overweight	84	88.8	No	No
2	0	2	0	0	4	0	non-exposed	Han	53	male	Middle school or high school	1	Married/cohabiting	20000~99999	Current smoking	Yes	Overweight	91	97.5	No	No
0	0	0	0	0	0	1	non-exposed	Han	53	male	Middle school or high school	1	Married/cohabiting	20000~99999	Current smoking	Yes	Overweight	86.5	101	No	No
1	0	1	0	0	2	1	non-exposed	Han	52	male	Middle school or high school	1	Married/cohabiting	20000~99999	Current smoking	Yes	Overweight	90	94	Yes	No
1	0	2	0	0	3	0	non-exposed	Han	51	male	Middle school or high school	1	Married/cohabiting	20000~99999	Current smoking	Yes	Overweight	81.5	94.5	No	No
0	0	0	0	0	0	1	non-exposed	Han	49	male	Middle school or high school	1	Married/cohabiting	20000~99999	Current smoking	Yes	Overweight	80	91	No	No
2	0	2	0	0	4	0	non-exposed	Han	47	male	Middle school or high school	1	Married/cohabiting	20000~99999	Current smoking	Yes	Overweight	90	96.3	No	No
0	0	2	0	0	2	1	non-exposed	Han	46	male	Middle school or high school	1	Married/cohabiting	20000~99999	Current smoking	Yes	Overweight	97	98	Yes	No
0	0	0	0	0	0	1	non-exposed	Han	45	male	Middle school or high school	1	Married/cohabiting	20000~99999	Current smoking	Yes	Overweight	78	94	Yes	No
2	0	2	0	0	4	0	non-exposed	Han	45	male	Middle school or high school	1	Married/cohabiting	20000~99999	Current smoking	Yes	Overweight	99	97	No	No
0	0	0	0	0	0	1	non-exposed	Han	44	male	Middle school or high school	1	Married/cohabiting	20000~99999	Current smoking	Yes	Overweight	97	93	No	No
0	0	0	0	0	0	1	non-exposed	Han	43	male	Middle school or high school	1	Married/cohabiting	20000~99999	Current smoking	Yes	Overweight	90	94	No	No
0	0	0	0	0	0	1	non-exposed	Han	42	male	Middle school or high school	1	Married/cohabiting	20000~99999	Current smoking	Yes	Overweight	87	95.5	Yes	No
0	0	0	0	0	0	1	non-exposed	Han	42	male	Middle school or high school	1	Married/cohabiting	20000~99999	Current smoking	Yes	Overweight	98	98	Yes	No
1	0	0	0	0	1	1	non-exposed	Han	52	male	Primary school and below	1	Married/cohabiting	>1000000	Current smoking	Yes	Overweight	86	90	No	No
1	0	1	0	0	2	1	non-exposed	Han	52	male	Middle school or high school	1	Married/cohabiting	>1000000	Current smoking	Yes	Overweight	84	88	Yes	No
0	0	0	0	0	0	1	non-exposed	Han	46	male	Middle school or high school	1	Married/cohabiting	>1000000	Current smoking	Yes	Overweight	88.7	93	No	No
2	0	4	1	0	6	0	non-exposed	Han	46	male	Middle school or high school	1	Married/cohabiting	>1000000	Current smoking	Yes	Overweight	102	104	No	No
0	0	0	0	0	0	1	non-exposed	Han	47	male	University and above	1	Married/cohabiting	>1000000	Current smoking	Yes	Overweight	93	97	No	No
0	0	0	0	0	0	1	non-exposed	Han	54	male	Primary school and below	2	Married/cohabiting	<20000	Current smoking	Yes	Overweight	101	100	Yes	No
0	0	0	0	0	0	1	non-exposed	Han	54	male	Middle school or high school	2	Married/cohabiting	<20000	Current smoking	Yes	Overweight	86	89	No	No
0	0	0	0	0	0	1	non-exposed	Han	46	male	Middle school or high school	2	Married/cohabiting	<20000	Current smoking	Yes	Overweight	82	92.5	No	No
0	0	0	0	0	0	1	childhood exposure	Han	65	male	Primary school and below	2	Married/cohabiting	20000~99999	Current smoking	Yes	Overweight	85	93	Yes	No
2	0	2	0	0	4	0	fetal exposure	Han	58	male	Middle school or high school	2	Married/cohabiting	20000~99999	Current smoking	Yes	Overweight	95	100	Yes	No
2	0	2	0	0	4	0	non-exposed	Han	55	male	Middle school or high school	2	Married/cohabiting	20000~99999	Current smoking	Yes	Overweight	81	91	Yes	No
0	0	0	0	0	0	1	non-exposed	Han	55	male	Middle school or high school	2	Married/cohabiting	20000~99999	Current smoking	Yes	Overweight	82	94	No	No
1	0	0	0	0	1	1	non-exposed	Han	52	male	Middle school or high school	2	Married/cohabiting	20000~99999	Current smoking	Yes	Overweight	82	93	No	No
0	0	0	0	0	0	1	non-exposed	Han	51	male	Middle school or high school	2	Married/cohabiting	20000~99999	Current smoking	Yes	Overweight	98	102	No	No
2	0	2	0	0	4	0	non-exposed	Han	48	male	Middle school or high school	2	Married/cohabiting	20000~99999	Current smoking	Yes	Overweight	87	93	Yes	No
0	0	0	0	0	0	1	childhood exposure	Han	65	male	Middle school or high school	2	Married/cohabiting	>1000000	Current smoking	Yes	Overweight	81.5	89.7	Yes	No
0	0	0	0	0	0	1	non-exposed	Han	53	male	Middle school or high school	2	Married/cohabiting	>1000000	Current smoking	Yes	Overweight	96	103	No	No
0	0	0	0	0	0	1	non-exposed	Han	56	male	University and above	2	Married/cohabiting	>1000000	Current smoking	Yes	Overweight	80	95	No	No
0	0	0	0	0	0	1	non-exposed	Han	54	male	University and above	2	Married/cohabiting	>1000000	Current smoking	Yes	Overweight	83.8	93	Yes	No
0	0	0	0	0	0	1	non-exposed	Han	50	male	University and above	2	Married/cohabiting	>1000000	Current smoking	Yes	Overweight	98	103	No	No
0	0	0	0	0	0	1	non-exposed	Han	45	male	University and above	2	Married/cohabiting	>1000000	Current smoking	Yes	Overweight	89	99	Yes	No
0	0	0	0	0	0	1	non-exposed	Han	51	male	Middle school or high school	3	Married/cohabiting	<20000	Current smoking	Yes	Overweight	87	90	No	No
3	1	4	1	1	0	1	fetal exposure	Han	58	male	Middle school or high school	3	Married/cohabiting	20000~99999	Current smoking	Yes	Overweight	79	87.5	Yes	No
1	0	1	0	0	2	1	non-exposed	Han	44	male	University and above	3	Married/cohabiting	20000~99999	Current smoking	Yes	Overweight	76.5	85.5	No	No
2	0	3	1	0	5	0	non-exposed	Han	55	male	Middle school or high school	2	Separated/divorced	<20000	Current smoking	Yes	Overweight	86.5	92	Yes	No
1	0	0	0	0	1	1	non-exposed	Han	56	male	University and above	2	Separated/divorced	20000~99999	Current smoking	Yes	Overweight	103.2	104.3	Yes	No
4	1	1	0	0	5	0	childhood exposure	Han	66	male	Primary school and below	1	Widowed spouse	<20000	Current smoking	Yes	Overweight	84	94.1	No	No
0	0	0	0	0	0	1	childhood exposure	Han	62	male	Primary school and below	1	Widowed spouse	<20000	Current smoking	Yes	Overweight	81	89.2	No	No
0	0	0	0	0	0	1	non-exposed	Han	54	male	Primary school and below	1	Widowed spouse	20000~99999	Current smoking	Yes	Overweight	89.5	93	No	No
2	0	2	0	0	4	0	non-exposed	Han	41	male	Middle school or high school	1	Widowed spouse	20000~99999	Current smoking	Yes	Overweight	92	101.5	Yes	No
0	0	0	0	0	0	1	childhood exposure	Han	66	male	Middle school or high school	1	Never married	<20000	Current smoking	Yes	Overweight	74	89	Yes	No
1	0	0	0	0	1	1	non-exposed	Han	76	male	Primary school and below	1	Married/cohabiting	<20000	Current smoking	Yes	Not overweight	72	86	No	No
0	0	0	0	0	0	1	adolescent exposure	Han	75	male	Primary school and below	1	Married/cohabiting	<20000	Current smoking	Yes	Not overweight	72.4	85.6	No	No
0	0	0	0	0	0	1	adolescent exposure	Han	74	male	Primary school and below	1	Married/cohabiting	<20000	Current smoking	Yes	Not overweight	80	91	No	No
2	0	2	0	0	4	0	adolescent exposure	Han	73	male	Primary school and below	1	Married/cohabiting	<20000	Current smoking	Yes	Not overweight	79	81	Yes	No
0	0	0	0	0	0	1	adolescent exposure	Han	70	male	Primary school and below	1	Married/cohabiting	<20000	Current smoking	Yes	Not overweight	70.6	79.8	No	No
0	0	2	0	0	2	1	childhood exposure	Han	67	male	Primary school and below	1	Married/cohabiting	<20000	Current smoking	Yes	Not overweight	71	84	Yes	No
0	0	0	0	0	0	1	childhood exposure	Han	65	male	Primary school and below	1	Married/cohabiting	<20000	Current smoking	Yes	Not overweight	72	85.5	No	No
6	1	6	1	1	12	0	childhood exposure	Han	65	male	Primary school and below	1	Married/cohabiting	<20000	Current smoking	Yes	Not overweight	84	89.5	Yes	No
0	0	0	0	0	0	1	childhood exposure	Han	64	male	Primary school and below	1	Married/cohabiting	<20000	Current smoking	Yes	Not overweight	68.5	87	Yes	No
0	0	0	0	0	0	1	childhood exposure	Han	64	male	Primary school and below	1	Married/cohabiting	<20000	Current smoking	Yes	Not overweight	65.2	86	Yes	No
0	0	1	0	0	1	1	childhood exposure	Han	63	male	Primary school and below	1	Married/cohabiting	<20000	Current smoking	Yes	Not overweight	67	81.8	No	No
0	0	0	0	0	0	1	childhood exposure	Han	63	male	Primary school and below	1	Married/cohabiting	<20000	Current smoking	Yes	Not overweight	72.3	84.8	Yes	No
0	0	0	0	0	0	1	childhood exposure	Han	63	male	Primary school and below	1	Married/cohabiting	<20000	Current smoking	Yes	Not overweight	84	85.5	Yes	No
0	0	0	0	0	0	1	childhood exposure	Han	62	male	Primary school and below	1	Married/cohabiting	<20000	Current smoking	Yes	Not overweight	65	89.5	No	No
2	0	2	0	0	4	0	childhood exposure	Han	61	male	Primary school and below	1	Married/cohabiting	<20000	Current smoking	Yes	Not overweight	83	91.5	No	No
0	0	1	0	0	1	1	childhood exposure	Han	61	male	Primary school and below	1	Married/cohabiting	<20000	Current smoking	Yes	Not overweight	70	86.3	No	No
1	0	1	0	0	2	1	childhood exposure	Han	61	male	Primary school and below	1	Married/cohabiting	<20000	Current smoking	Yes	Not overweight	66	85	Yes	No
3	1	1	0	0	4	0	childhood exposure	Han	61	male	Primary school and below	1	Married/cohabiting	<20000	Current smoking	Yes	Not overweight	67.7	84	No	No
0	0	0	0	0	0	1	fetal exposure	Han	59	male	Primary school and below	1	Married/cohabiting	<20000	Current smoking	Yes	Not overweight	76.4	84.1	No	No
0	0	0	0	0	0	1	fetal exposure	Han	59	male	Primary school and below	1	Married/cohabiting	<20000	Current smoking	Yes	Not overweight	77	90	Yes	No
2	0	4	1	0	6	0	non-exposed	Han	56	male	Primary school and below	1	Married/cohabiting	<20000	Current smoking	Yes	Not overweight	69	84	No	No
2	0	0	0	0	2	1	non-exposed	Han	56	male	Primary school and below	1	Married/cohabiting	<20000	Current smoking	Yes	Not overweight	66.3	83.5	No	No
2	0	2	0	0	4	0	non-exposed	Han	53	male	Primary school and below	1	Married/cohabiting	<20000	Current smoking	Yes	Not overweight	74.5	85.5	Yes	No
0	0	0	0	0	0	1	non-exposed	Han	53	male	Primary school and below	1	Married/cohabiting	<20000	Current smoking	Yes	Not overweight	73	85.5	No	No
3	1	0	0	0	3	0	non-exposed	Han	52	male	Primary school and below	1	Married/cohabiting	<20000	Current smoking	Yes	Not overweight	75.5	80	No	No
0	0	0	0	0	0	1	non-exposed	Han	51	male	Primary school and below	1	Married/cohabiting	<20000	Current smoking	Yes	Not overweight	74	92	No	No
2	0	0	0	0	2	1	non-exposed	Han	51	male	Primary school and below	1	Married/cohabiting	<20000	Current smoking	Yes	Not overweight	67.5	75	No	No
0	0	0	0	0	0	1	non-exposed	Han	50	male	Primary school and below	1	Married/cohabiting	<20000	Current smoking	Yes	Not overweight	78	85	Yes	No
0	0	0	0	0	0	1	non-exposed	Han	49	male	Primary school and below	1	Married/cohabiting	<20000	Current smoking	Yes	Not overweight	81.8	90.9	No	No
0	0	0	0	0	0	1	non-exposed	Han	47	male	Primary school and below	1	Married/cohabiting	<20000	Current smoking	Yes	Not overweight	73.2	84.5	No	No
0	0	0	0	0	0	1	non-exposed	Han	45	male	Primary school and below	1	Married/cohabiting	<20000	Current smoking	Yes	Not overweight	79	87	No	No
2	0	0	0	0	2	1	non-exposed	Han	43	male	Primary school and below	1	Married/cohabiting	<20000	Current smoking	Yes	Not overweight	82	92.5	No	No
1	0	0	0	0	1	1	adolescent exposure	Han	70	male	Middle school or high school	1	Married/cohabiting	<20000	Current smoking	Yes	Not overweight	74	81	No	No
0	0	0	0	0	0	1	childhood exposure	Han	69	male	Middle school or high school	1	Married/cohabiting	<20000	Current smoking	Yes	Not overweight	78	88	Yes	No
0	0	0	0	0	0	1	childhood exposure	Han	67	male	Middle school or high school	1	Married/cohabiting	<20000	Current smoking	Yes	Not overweight	63	84	Yes	No
0	0	2	0	0	2	1	childhood exposure	Han	63	male	Middle school or high school	1	Married/cohabiting	<20000	Current smoking	Yes	Not overweight	73	85	Yes	No
0	0	0	0	0	0	1	childhood exposure	Han	62	male	Middle school or high school	1	Married/cohabiting	<20000	Current smoking	Yes	Not overweight	70	86	Yes	No
1	0	0	0	0	1	1	childhood exposure	Han	61	male	Middle school or high school	1	Married/cohabiting	<20000	Current smoking	Yes	Not overweight	82.6	92	No	No
1	0	0	0	0	1	1	childhood exposure	Han	61	male	Middle school or high school	1	Married/cohabiting	<20000	Current smoking	Yes	Not overweight	70.2	82	No	No
0	0	0	0	0	0	1	fetal exposure	Han	59	male	Middle school or high school	1	Married/cohabiting	<20000	Current smoking	Yes	Not overweight	69	81	No	No
0	0	0	0	0	0	1	fetal exposure	Han	59	male	Middle school or high school	1	Married/cohabiting	<20000	Current smoking	Yes	Not overweight	65	80	Yes	No
1	0	0	0	0	1	1	fetal exposure	Han	58	male	Middle school or high school	1	Married/cohabiting	<20000	Current smoking	Yes	Not overweight	71	90	Yes	No
1	0	1	0	0	2	1	fetal exposure	Han	58	male	Middle school or high school	1	Married/cohabiting	<20000	Current smoking	Yes	Not overweight	79.5	86.5	Yes	No
0	0	0	0	0	0	1	fetal exposure	Han	58	male	Middle school or high school	1	Married/cohabiting	<20000	Current smoking	Yes	Not overweight	69.5	82.5	No	No
0	0	0	0	0	0	1	non-exposed	Han	56	male	Middle school or high school	1	Married/cohabiting	<20000	Current smoking	Yes	Not overweight	74	91	No	No
0	0	0	0	0	0	1	non-exposed	Han	52	male	Middle school or high school	1	Married/cohabiting	<20000	Current smoking	Yes	Not overweight	74	90	No	No
0	0	0	0	0	0	1	non-exposed	Han	50	male	Middle school or high school	1	Married/cohabiting	<20000	Current smoking	Yes	Not overweight	69.2	79	No	No
0	0	0	0	0	0	1	non-exposed	Han	48	male	Middle school or high school	1	Married/cohabiting	<20000	Current smoking	Yes	Not overweight	76.5	92	No	No
0	0	0	0	0	0	1	non-exposed	Han	46	male	Middle school or high school	1	Married/cohabiting	<20000	Current smoking	Yes	Not overweight	72.3	89.8	No	No
0	0	0	0	0	0	1	adolescent exposure	Han	71	male	Primary school and below	1	Married/cohabiting	20000~99999	Current smoking	Yes	Not overweight	74	90	Yes	No
1	0	0	0	0	1	1	childhood exposure	Han	69	male	Primary school and below	1	Married/cohabiting	20000~99999	Current smoking	Yes	Not overweight	82	93	Yes	No
2	0	2	0	0	4	0	childhood exposure	Han	65	male	Primary school and below	1	Married/cohabiting	20000~99999	Current smoking	Yes	Not overweight	80	86	No	No
0	0	0	0	0	0	1	childhood exposure	Han	65	male	Primary school and below	1	Married/cohabiting	20000~99999	Current smoking	Yes	Not overweight	64.5	84.5	No	No
0	0	0	0	0	0	1	childhood exposure	Han	64	male	Primary school and below	1	Married/cohabiting	20000~99999	Current smoking	Yes	Not overweight	82	86	No	No
0	0	0	0	0	0	1	childhood exposure	Han	64	male	Primary school and below	1	Married/cohabiting	20000~99999	Current smoking	Yes	Not overweight	66	84	No	No
0	0	0	0	0	0	1	childhood exposure	Han	63	male	Primary school and below	1	Married/cohabiting	20000~99999	Current smoking	Yes	Not overweight	77.2	89.3	No	No
0	0	0	0	0	0	1	childhood exposure	Han	62	male	Primary school and below	1	Married/cohabiting	20000~99999	Current smoking	Yes	Not overweight	65	79	No	No
0	0	0	0	0	0	1	childhood exposure	Han	61	male	Primary school and below	1	Married/cohabiting	20000~99999	Current smoking	Yes	Not overweight	76	89	Yes	No
0	0	0	0	0	0	1	childhood exposure	Han	61	male	Primary school and below	1	Married/cohabiting	20000~99999	Current smoking	Yes	Not overweight	84	87.5	No	No
1	0	1	0	0	2	1	fetal exposure	Han	59	male	Primary school and below	1	Married/cohabiting	20000~99999	Current smoking	Yes	Not overweight	63	83.8	No	No
1	0	2	0	0	3	0	fetal exposure	Han	58	male	Primary school and below	1	Married/cohabiting	20000~99999	Current smoking	Yes	Not overweight	77	88	No	No
0	0	2	0	0	2	1	non-exposed	Han	56	male	Primary school and below	1	Married/cohabiting	20000~99999	Current smoking	Yes	Not overweight	72.4	88.5	No	No
2	0	3	1	0	5	0	non-exposed	Han	56	male	Primary school and below	1	Married/cohabiting	20000~99999	Current smoking	Yes	Not overweight	82.4	93	No	No
0	0	0	0	0	0	1	non-exposed	Han	54	male	Primary school and below	1	Married/cohabiting	20000~99999	Current smoking	Yes	Not overweight	74.7	85.8	Yes	No
2	0	2	0	0	4	0	non-exposed	Han	53	male	Primary school and below	1	Married/cohabiting	20000~99999	Current smoking	Yes	Not overweight	74.5	88	No	No
2	0	2	0	0	4	0	non-exposed	Han	52	male	Primary school and below	1	Married/cohabiting	20000~99999	Current smoking	Yes	Not overweight	67	82	No	No
0	0	0	0	0	0	1	non-exposed	Han	51	male	Primary school and below	1	Married/cohabiting	20000~99999	Current smoking	Yes	Not overweight	73	86	No	No
0	0	0	0	0	0	1	non-exposed	Han	50	male	Primary school and below	1	Married/cohabiting	20000~99999	Current smoking	Yes	Not overweight	83.5	91.5	No	No
0	0	0	0	0	0	1	non-exposed	Han	50	male	Primary school and below	1	Married/cohabiting	20000~99999	Current smoking	Yes	Not overweight	123	108	No	No
2	0	1	0	0	3	0	non-exposed	Han	48	male	Primary school and below	1	Married/cohabiting	20000~99999	Current smoking	Yes	Not overweight	73	87	Yes	No
0	0	0	0	0	0	1	non-exposed	Han	48	male	Primary school and below	1	Married/cohabiting	20000~99999	Current smoking	Yes	Not overweight	82	95	No	No
0	0	0	0	0	0	1	non-exposed	Han	47	male	Primary school and below	1	Married/cohabiting	20000~99999	Current smoking	Yes	Not overweight	73	92	No	No
0	0	1	0	0	1	1	non-exposed	Han	46	male	Primary school and below	1	Married/cohabiting	20000~99999	Current smoking	Yes	Not overweight	78.8	89.5	No	No
0	0	0	0	0	0	1	non-exposed	Han	46	male	Primary school and below	1	Married/cohabiting	20000~99999	Current smoking	Yes	Not overweight	82	92	No	No
0	0	0	0	0	0	1	adolescent exposure	Han	71	male	Middle school or high school	1	Married/cohabiting	20000~99999	Current smoking	Yes	Not overweight	78.5	88	No	No
0	0	0	0	0	0	1	childhood exposure	Han	67	male	Middle school or high school	1	Married/cohabiting	20000~99999	Current smoking	Yes	Not overweight	67.3	84.7	Yes	No
0	0	0	0	0	0	1	childhood exposure	Han	62	male	Middle school or high school	1	Married/cohabiting	20000~99999	Current smoking	Yes	Not overweight	74	79	Yes	No
0	0	0	0	0	0	1	childhood exposure	Han	61	male	Middle school or high school	1	Married/cohabiting	20000~99999	Current smoking	Yes	Not overweight	70	87	No	No
0	0	0	0	0	0	1	fetal exposure	Han	58	male	Middle school or high school	1	Married/cohabiting	20000~99999	Current smoking	Yes	Not overweight	66.5	83	No	No
0	0	0	0	0	0	1	fetal exposure	Han	58	male	Middle school or high school	1	Married/cohabiting	20000~99999	Current smoking	Yes	Not overweight	85.7	94	Yes	No
0	0	3	1	0	3	0	non-exposed	Han	56	male	Middle school or high school	1	Married/cohabiting	20000~99999	Current smoking	Yes	Not overweight	68	88	Yes	No
0	0	1	0	0	1	1	non-exposed	Han	52	male	Middle school or high school	1	Married/cohabiting	20000~99999	Current smoking	Yes	Not overweight	70	86	No	No
0	0	2	0	0	2	1	non-exposed	Han	51	male	Middle school or high school	1	Married/cohabiting	20000~99999	Current smoking	Yes	Not overweight	74.5	90	No	No
0	0	0	0	0	0	1	non-exposed	Han	45	male	Middle school or high school	1	Married/cohabiting	20000~99999	Current smoking	Yes	Not overweight	69	81	No	No
0	0	0	0	0	0	1	non-exposed	Han	45	male	Middle school or high school	1	Married/cohabiting	20000~99999	Current smoking	Yes	Not overweight	85	89	No	No
0	0	0	0	0	0	1	non-exposed	Han	43	male	Middle school or high school	1	Married/cohabiting	20000~99999	Current smoking	Yes	Not overweight	77.5	85.5	No	No
0	0	0	0	0	0	1	non-exposed	Han	43	male	Middle school or high school	1	Married/cohabiting	20000~99999	Current smoking	Yes	Not overweight	68.5	81	No	No
0	0	0	0	0	0	1	childhood exposure	Han	69	male	Primary school and below	1	Married/cohabiting	>1000000	Current smoking	Yes	Not overweight	74	86.2	No	No
1	0	1	0	0	2	1	childhood exposure	Han	64	male	Primary school and below	1	Married/cohabiting	>1000000	Current smoking	Yes	Not overweight	82.5	97.7	No	No
4	1	3	1	1	0	1	fetal exposure	Han	59	male	University and above	2	Married/cohabiting	20000~99999	Current smoking	Yes	Not overweight	74	87.5	No	No
0	0	0	0	0	0	1	childhood exposure	Han	67	male	Middle school or high school	2	Married/cohabiting	>1000000	Current smoking	Yes	Not overweight	83.5	88.8	No	No
0	0	0	0	0	0	1	childhood exposure	Han	64	male	Middle school or high school	2	Married/cohabiting	>1000000	Current smoking	Yes	Not overweight	76.2	89.2	No	No
0	0	0	0	0	0	1	childhood exposure	Han	61	male	Middle school or high school	2	Married/cohabiting	>1000000	Current smoking	Yes	Not overweight	76	88	No	No
2	0	1	0	0	3	0	childhood exposure	Han	64	male	University and above	2	Married/cohabiting	>1000000	Current smoking	Yes	Not overweight	80	92.5	No	No
0	0	0	0	0	0	1	childhood exposure	Han	62	male	University and above	2	Married/cohabiting	>1000000	Current smoking	Yes	Not overweight	85.5	94	No	No
1	0	0	0	0	1	1	non-exposed	Han	49	male	University and above	2	Married/cohabiting	>1000000	Current smoking	Yes	Not overweight	89	99	No	No
5	1	1	0	0	6	0	adolescent exposure	Han	71	male	Middle school or high school	3	Married/cohabiting	<20000	Current smoking	Yes	Not overweight	73	88	No	No
1	0	1	0	0	2	1	non-exposed	Han	48	male	Middle school or high school	3	Married/cohabiting	20000~99999	Current smoking	Yes	Not overweight	77	89	No	No
4	1	0	0	0	4	0	non-exposed	Han	43	male	Primary school and below	1	Separated/divorced	<20000	Current smoking	Yes	Not overweight	82.5	86.7	No	No
2	0	2	0	0	4	0	non-exposed	Han	48	male	Primary school and below	1	Separated/divorced	20000~99999	Current smoking	Yes	Not overweight	74	87	Yes	No
0	0	0	0	0	0	1	childhood exposure	Han	63	male	Middle school or high school	1	Separated/divorced	20000~99999	Current smoking	Yes	Not overweight	88.5	91	No	No
1	0	0	0	0	1	1	non-exposed	Han	77	male	Primary school and below	1	Widowed spouse	<20000	Current smoking	Yes	Not overweight	87	88	No	No
3	1	2	0	0	5	0	non-exposed	Han	76	male	Primary school and below	1	Widowed spouse	20000~99999	Current smoking	Yes	Not overweight	77	86	Yes	No
0	0	0	0	0	0	1	childhood exposure	Han	66	male	Primary school and below	1	Widowed spouse	20000~99999	Current smoking	Yes	Not overweight	74	89.5	No	No
0	0	0	0	0	0	1	childhood exposure	Han	65	male	Primary school and below	1	Widowed spouse	20000~99999	Current smoking	Yes	Not overweight	65	80	No	No
2	0	1	0	0	3	0	childhood exposure	Han	65	male	Primary school and below	1	Married/cohabiting	<20000	Current smoking	Yes	Overweight	94	96	Yes	No
2	0	1	0	0	3	0	non-exposed	Han	56	male	Primary school and below	1	Married/cohabiting	<20000	Current smoking	Yes	Overweight	78	88	No	No
2	0	1	0	0	3	0	non-exposed	Han	52	male	Primary school and below	1	Married/cohabiting	<20000	Current smoking	Yes	Overweight	78.5	88	No	Yes
4	1	4	1	1	8	0	non-exposed	Han	52	male	Primary school and below	1	Married/cohabiting	<20000	Current smoking	Yes	Overweight	88.2	94.2	No	Yes
2	0	1	0	0	3	0	non-exposed	Han	51	male	Primary school and below	1	Married/cohabiting	<20000	Current smoking	Yes	Overweight	74	87	No	No
1	0	2	0	0	3	0	non-exposed	Han	48	male	Primary school and below	1	Married/cohabiting	<20000	Current smoking	Yes	Overweight	84	94.5	No	No
0	0	0	0	0	0	1	adolescent exposure	Han	70	male	Middle school or high school	1	Married/cohabiting	<20000	Current smoking	Yes	Overweight	85	89	No	No
1	0	1	0	0	2	1	childhood exposure	Han	61	male	Middle school or high school	1	Married/cohabiting	<20000	Current smoking	Yes	Overweight	79.8	91.5	Yes	No
0	0	0	0	0	0	1	non-exposed	Han	56	male	Middle school or high school	1	Married/cohabiting	<20000	Current smoking	Yes	Overweight	98	97	No	No
1	0	0	0	0	1	1	non-exposed	Han	50	male	Middle school or high school	1	Married/cohabiting	<20000	Current smoking	Yes	Overweight	95	101	No	Yes
2	0	3	1	0	5	0	non-exposed	Han	44	male	Middle school or high school	1	Married/cohabiting	<20000	Current smoking	Yes	Overweight	91	89	Yes	No
0	0	0	0	0	0	1	adolescent exposure	Han	71	male	Primary school and below	1	Married/cohabiting	20000~99999	Current smoking	Yes	Overweight	90	96	No	No
0	0	0	0	0	0	1	childhood exposure	Han	65	male	Primary school and below	1	Married/cohabiting	20000~99999	Current smoking	Yes	Overweight	84	90	Yes	No
0	0	2	0	0	2	1	fetal exposure	Han	58	male	Primary school and below	1	Married/cohabiting	20000~99999	Current smoking	Yes	Overweight	91.5	93.5	Yes	Yes
0	0	0	0	0	0	1	non-exposed	Han	54	male	Primary school and below	1	Married/cohabiting	20000~99999	Current smoking	Yes	Overweight	106	103	Yes	No
0	0	0	0	0	0	1	non-exposed	Han	52	male	Primary school and below	1	Married/cohabiting	20000~99999	Current smoking	Yes	Overweight	104	100.5	No	No
0	0	0	0	0	0	1	non-exposed	Han	49	male	Primary school and below	1	Married/cohabiting	20000~99999	Current smoking	Yes	Overweight	90.5	94	No	No
0	0	1	0	0	1	1	non-exposed	Han	44	male	Primary school and below	1	Married/cohabiting	20000~99999	Current smoking	Yes	Overweight	92	97	Yes	Yes
2	0	2	0	0	4	0	childhood exposure	Han	63	male	Middle school or high school	1	Married/cohabiting	20000~99999	Current smoking	Yes	Overweight	94.1	103.8	Yes	No
2	0	1	0	0	3	0	childhood exposure	Han	62	male	Middle school or high school	1	Married/cohabiting	20000~99999	Current smoking	Yes	Overweight	86	87	No	No
0	0	0	0	0	0	1	fetal exposure	Han	59	male	Middle school or high school	1	Married/cohabiting	20000~99999	Current smoking	Yes	Overweight	90	100	No	Yes
0	0	0	0	0	0	1	fetal exposure	Han	58	male	Middle school or high school	1	Married/cohabiting	20000~99999	Current smoking	Yes	Overweight	80	88	Yes	Yes
0	0	0	0	0	0	1	non-exposed	Han	56	male	Middle school or high school	1	Married/cohabiting	20000~99999	Current smoking	Yes	Overweight	79	89	Yes	Yes
0	0	0	0	0	0	1	non-exposed	Han	50	male	Middle school or high school	1	Married/cohabiting	20000~99999	Current smoking	Yes	Overweight	80.5	87.2	No	No
0	0	0	0	0	0	1	non-exposed	Han	49	male	Middle school or high school	1	Married/cohabiting	20000~99999	Current smoking	Yes	Overweight	107	109.8	Yes	No
1	0	0	0	0	1	1	non-exposed	Han	49	male	Middle school or high school	1	Married/cohabiting	20000~99999	Current smoking	Yes	Overweight	93	95	No	Yes
2	0	1	0	0	3	0	non-exposed	Han	48	male	Middle school or high school	1	Married/cohabiting	20000~99999	Current smoking	Yes	Overweight	92	99	No	No
0	0	0	0	0	0	1	non-exposed	Han	48	male	Middle school or high school	1	Married/cohabiting	20000~99999	Current smoking	Yes	Overweight	80	93	No	No
0	0	0	0	0	0	1	non-exposed	Han	44	male	Middle school or high school	1	Married/cohabiting	20000~99999	Current smoking	Yes	Overweight	79.5	91	No	No
0	0	0	0	0	0	1	non-exposed	Han	40	male	Middle school or high school	1	Married/cohabiting	20000~99999	Current smoking	Yes	Overweight	93	95.5	Yes	No
0	0	0	0	0	0	1	adolescent exposure	Han	75	male	Primary school and below	1	Married/cohabiting	>1000000	Current smoking	Yes	Overweight	99	101	No	No
0	0	0	0	0	0	1	childhood exposure	Han	63	male	Middle school or high school	1	Married/cohabiting	>1000000	Current smoking	Yes	Overweight	92	95	Yes	Yes
1	0	1	0	0	2	1	non-exposed	Han	78	male	Primary school and below	2	Married/cohabiting	20000~99999	Current smoking	Yes	Overweight	102.5	96.4	No	Yes
1	0	0	0	0	1	1	childhood exposure	Han	64	male	Middle school or high school	2	Married/cohabiting	20000~99999	Current smoking	Yes	Overweight	74	87.8	No	No
0	0	0	0	0	0	1	non-exposed	Han	51	male	Middle school or high school	2	Married/cohabiting	>1000000	Current smoking	Yes	Overweight	87	93	No	Yes
1	0	0	0	0	1	1	non-exposed	Han	53	male	University and above	2	Married/cohabiting	>1000000	Current smoking	Yes	Overweight	82	95	Yes	Yes
0	0	0	0	0	0	1	childhood exposure	Han	63	male	Middle school or high school	3	Married/cohabiting	>1000000	Current smoking	Yes	Overweight	90	95	Yes	Yes
5	1	6	1	1	11	0	adolescent exposure	Han	72	male	Primary school and below	1	Married/cohabiting	<20000	Current smoking	Yes	Not overweight	71.5	87.5	No	No
2	0	2	0	0	4	0	childhood exposure	Han	65	male	Primary school and below	1	Married/cohabiting	<20000	Current smoking	Yes	Not overweight	66	80	No	No
2	0	2	0	0	4	0	childhood exposure	Han	65	male	Primary school and below	1	Married/cohabiting	<20000	Current smoking	Yes	Not overweight	78	89	Yes	No
0	0	0	0	0	0	1	childhood exposure	Han	64	male	Primary school and below	1	Married/cohabiting	<20000	Current smoking	Yes	Not overweight	75	84.5	Yes	No
0	0	0	0	0	0	1	childhood exposure	Han	62	male	Primary school and below	1	Married/cohabiting	<20000	Current smoking	Yes	Not overweight	69	79	No	Yes
1	0	1	0	0	2	1	non-exposed	Han	56	male	Primary school and below	1	Married/cohabiting	<20000	Current smoking	Yes	Not overweight	79.5	85.8	No	Yes
0	0	0	0	0	0	1	non-exposed	Han	56	male	Primary school and below	1	Married/cohabiting	<20000	Current smoking	Yes	Not overweight	79	90	No	No
1	0	0	0	0	1	1	non-exposed	Han	51	male	Primary school and below	1	Married/cohabiting	<20000	Current smoking	Yes	Not overweight	79	93	No	No
1	0	1	0	0	2	1	non-exposed	Han	44	male	Primary school and below	1	Married/cohabiting	<20000	Current smoking	Yes	Not overweight	72	89.5	No	No
0	0	0	0	0	0	1	adolescent exposure	Han	72	male	Middle school or high school	1	Married/cohabiting	<20000	Current smoking	Yes	Not overweight	84	90	Yes	No
0	0	2	0	0	2	1	childhood exposure	Han	63	male	Middle school or high school	1	Married/cohabiting	<20000	Current smoking	Yes	Not overweight	85	90	Yes	Yes
0	0	0	0	0	0	1	childhood exposure	Han	63	male	Middle school or high school	1	Married/cohabiting	<20000	Current smoking	Yes	Not overweight	68	83	No	No
0	0	0	0	0	0	1	childhood exposure	Han	62	male	Middle school or high school	1	Married/cohabiting	<20000	Current smoking	Yes	Not overweight	75	83.7	No	No
0	0	0	0	0	0	1	childhood exposure	Han	61	male	Middle school or high school	1	Married/cohabiting	<20000	Current smoking	Yes	Not overweight	88.5	97.4	No	No
1	0	2	0	0	3	0	childhood exposure	Han	61	male	Middle school or high school	1	Married/cohabiting	<20000	Current smoking	Yes	Not overweight	76.2	82.9	No	No
0	0	0	0	0	0	1	childhood exposure	Han	61	male	Middle school or high school	1	Married/cohabiting	<20000	Current smoking	Yes	Not overweight	75.6	81.5	No	Yes
1	0	0	0	0	1	1	non-exposed	Han	56	male	Middle school or high school	1	Married/cohabiting	<20000	Current smoking	Yes	Not overweight	86	88	Yes	Yes
0	0	0	0	0	0	1	non-exposed	Han	52	male	Middle school or high school	1	Married/cohabiting	<20000	Current smoking	Yes	Not overweight	81.5	92.5	Yes	No
0	0	0	0	0	0	1	childhood exposure	Han	62	male	Primary school and below	1	Married/cohabiting	20000~99999	Current smoking	Yes	Not overweight	79.6	85.2	No	No
0	0	1	0	0	1	1	childhood exposure	Han	62	male	Primary school and below	1	Married/cohabiting	20000~99999	Current smoking	Yes	Not overweight	70.1	86.7	No	No
0	0	0	0	0	0	1	childhood exposure	Han	61	male	Primary school and below	1	Married/cohabiting	20000~99999	Current smoking	Yes	Not overweight	72.2	86.5	No	No
1	0	2	0	0	3	0	non-exposed	Han	53	male	Primary school and below	1	Married/cohabiting	20000~99999	Current smoking	Yes	Not overweight	76	82.3	No	No
2	0	2	0	0	4	0	non-exposed	Han	52	male	Primary school and below	1	Married/cohabiting	20000~99999	Current smoking	Yes	Not overweight	86.5	94	No	Yes
2	0	1	0	0	3	0	non-exposed	Han	49	male	Primary school and below	1	Married/cohabiting	20000~99999	Current smoking	Yes	Not overweight	68	82.7	No	No
0	0	0	0	0	0	1	non-exposed	Han	46	male	Primary school and below	1	Married/cohabiting	20000~99999	Current smoking	Yes	Not overweight	75.5	86.5	No	Yes
0	0	0	0	0	0	1	non-exposed	Han	42	male	Primary school and below	1	Married/cohabiting	20000~99999	Current smoking	Yes	Not overweight	66.5	80.5	No	No
0	0	0	0	0	0	1	childhood exposure	Han	62	male	Middle school or high school	1	Married/cohabiting	20000~99999	Current smoking	Yes	Not overweight	69.5	94	No	No
4	1	0	0	0	1	1	fetal exposure	Han	59	male	Middle school or high school	1	Married/cohabiting	20000~99999	Current smoking	Yes	Not overweight	72	90	No	No
0	0	0	0	0	0	1	fetal exposure	Han	59	male	Middle school or high school	1	Married/cohabiting	20000~99999	Current smoking	Yes	Not overweight	72	84	No	No
0	0	0	0	0	0	1	fetal exposure	Han	58	male	Middle school or high school	1	Married/cohabiting	20000~99999	Current smoking	Yes	Not overweight	66.5	82	No	No
1	0	1	0	0	2	1	non-exposed	Han	55	male	Middle school or high school	1	Married/cohabiting	20000~99999	Current smoking	Yes	Not overweight	75	85.5	No	No
0	0	0	0	0	0	1	non-exposed	Han	53	male	Middle school or high school	1	Married/cohabiting	20000~99999	Current smoking	Yes	Not overweight	57	76	No	No
2	0	2	0	0	4	0	non-exposed	Han	50	male	Middle school or high school	1	Married/cohabiting	20000~99999	Current smoking	Yes	Not overweight	83	93	Yes	Yes
2	0	1	0	0	3	0	childhood exposure	Han	62	male	Primary school and below	1	Married/cohabiting	>1000000	Current smoking	Yes	Not overweight	76	89.2	No	No
0	0	0	0	0	0	1	childhood exposure	Han	69	male	Primary school and below	2	Married/cohabiting	<20000	Current smoking	Yes	Not overweight	74	80	Yes	Yes
0	0	0	0	0	0	1	adolescent exposure	Han	70	male	Primary school and below	2	Married/cohabiting	20000~99999	Current smoking	Yes	Not overweight	85	88.8	No	No
0	0	0	0	0	0	1	non-exposed	Han	42	male	Primary school and below	2	Married/cohabiting	20000~99999	Current smoking	Yes	Not overweight	69	82	No	No
0	0	2	0	0	2	1	childhood exposure	Han	61	male	Middle school or high school	2	Married/cohabiting	20000~99999	Current smoking	Yes	Not overweight	84.5	88.5	No	No
0	0	0	0	0	0	1	adolescent exposure	Han	70	male	Middle school or high school	3	Married/cohabiting	20000~99999	Current smoking	Yes	Not overweight	89	96.5	No	No
2	0	2	0	0	4	0	childhood exposure	Han	64	male	Primary school and below	1	Separated/divorced	<20000	Current smoking	Yes	Not overweight	84	91	No	No
2	0	2	0	0	4	0	non-exposed	Han	45	male	Primary school and below	1	Separated/divorced	<20000	Current smoking	Yes	Not overweight	78	85.5	No	No
2	0	1	0	0	3	0	adolescent exposure	Han	71	male	Primary school and below	1	Widowed spouse	<20000	Current smoking	Yes	Not overweight	73.5	87.4	No	No
0	0	0	0	0	0	1	childhood exposure	Han	65	male	Primary school and below	1	Widowed spouse	<20000	Current smoking	Yes	Not overweight	63	83	Yes	No
0	0	0	0	0	0	1	childhood exposure	Han	69	male	Primary school and below	1	Widowed spouse	20000~99999	Current smoking	Yes	Not overweight	66.5	80.5	No	No
0	0	0	0	0	0	1	adolescent exposure	Han	73	male	Primary school and below	1	Married/cohabiting	<20000	Current smoking	Yes	Overweight	78	85	No	No
1	0	1	0	0	2	1	adolescent exposure	Han	71	male	Primary school and below	1	Married/cohabiting	<20000	Current smoking	Yes	Overweight	81	95	No	No
0	0	0	0	0	0	1	adolescent exposure	Han	71	male	Primary school and below	1	Married/cohabiting	<20000	Current smoking	Yes	Overweight	94	87	No	No
1	0	0	0	0	1	1	adolescent exposure	Han	70	male	Primary school and below	1	Married/cohabiting	<20000	Current smoking	Yes	Overweight	82	91.5	Yes	No
2	0	2	0	0	4	0	adolescent exposure	Han	70	male	Primary school and below	1	Married/cohabiting	<20000	Current smoking	Yes	Overweight	83	88.5	Yes	No
3	1	1	0	0	4	0	childhood exposure	Han	66	male	Primary school and below	1	Married/cohabiting	<20000	Current smoking	Yes	Overweight	97.5	102	No	No
1	0	2	0	0	3	0	childhood exposure	Han	66	male	Primary school and below	1	Married/cohabiting	<20000	Current smoking	Yes	Overweight	82	90	No	No
2	0	0	0	0	2	1	childhood exposure	Han	66	male	Primary school and below	1	Married/cohabiting	<20000	Current smoking	Yes	Overweight	89	94	No	No
0	0	0	0	0	0	1	childhood exposure	Han	65	male	Primary school and below	1	Married/cohabiting	<20000	Current smoking	Yes	Overweight	88	93	No	No
0	0	0	0	0	0	1	childhood exposure	Han	65	male	Primary school and below	1	Married/cohabiting	<20000	Current smoking	Yes	Overweight	76	86	No	No
2	0	2	0	0	4	0	childhood exposure	Han	65	male	Primary school and below	1	Married/cohabiting	<20000	Current smoking	Yes	Overweight	87	93	No	No
0	0	0	0	0	0	1	childhood exposure	Han	64	male	Primary school and below	1	Married/cohabiting	<20000	Current smoking	Yes	Overweight	79	90.5	No	No
0	0	0	0	0	0	1	childhood exposure	Han	64	male	Primary school and below	1	Married/cohabiting	<20000	Current smoking	Yes	Overweight	85	91	Yes	No
1	0	0	0	0	1	1	childhood exposure	Han	64	male	Primary school and below	1	Married/cohabiting	<20000	Current smoking	Yes	Overweight	84.5	93	No	No
1	0	0	0	0	1	1	childhood exposure	Han	64	male	Primary school and below	1	Married/cohabiting	<20000	Current smoking	Yes	Overweight	80.2	87.3	No	No
1	0	1	0	0	2	1	childhood exposure	Han	63	male	Primary school and below	1	Married/cohabiting	<20000	Current smoking	Yes	Overweight	84	87	No	No
0	0	0	0	0	0	1	childhood exposure	Han	62	male	Primary school and below	1	Married/cohabiting	<20000	Current smoking	Yes	Overweight	78	90.2	No	No
1	0	1	0	0	2	1	childhood exposure	Han	61	male	Primary school and below	1	Married/cohabiting	<20000	Current smoking	Yes	Overweight	84.5	89.1	No	No
3	1	0	0	0	0	1	fetal exposure	Han	57	male	Primary school and below	1	Married/cohabiting	<20000	Current smoking	Yes	Overweight	78	82	No	No
4	1	2	0	0	6	0	non-exposed	Han	56	male	Primary school and below	1	Married/cohabiting	<20000	Current smoking	Yes	Overweight	82.5	88	No	No
0	0	1	0	0	1	1	non-exposed	Han	55	male	Primary school and below	1	Married/cohabiting	<20000	Current smoking	Yes	Overweight	93	94.5	No	No
2	0	2	0	0	4	0	non-exposed	Han	55	male	Primary school and below	1	Married/cohabiting	<20000	Current smoking	Yes	Overweight	87	95	No	No
0	0	0	0	0	0	1	non-exposed	Han	55	male	Primary school and below	1	Married/cohabiting	<20000	Current smoking	Yes	Overweight	77	86	No	No
2	0	2	0	0	4	0	non-exposed	Han	54	male	Primary school and below	1	Married/cohabiting	<20000	Current smoking	Yes	Overweight	75.5	90.4	No	No
0	0	0	0	0	0	1	non-exposed	Han	54	male	Primary school and below	1	Married/cohabiting	<20000	Current smoking	Yes	Overweight	78.2	91	No	No
0	0	0	0	0	0	1	non-exposed	Han	53	male	Primary school and below	1	Married/cohabiting	<20000	Current smoking	Yes	Overweight	86.5	99	No	No
0	0	0	0	0	0	1	non-exposed	Han	53	male	Primary school and below	1	Married/cohabiting	<20000	Current smoking	Yes	Overweight	85.2	93	No	No
0	0	0	0	0	0	1	non-exposed	Han	53	male	Primary school and below	1	Married/cohabiting	<20000	Current smoking	Yes	Overweight	79	89.3	No	No
0	0	0	0	0	0	1	non-exposed	Han	53	male	Primary school and below	1	Married/cohabiting	<20000	Current smoking	Yes	Overweight	79	94	No	No
0	0	0	0	0	0	1	non-exposed	Han	53	male	Primary school and below	1	Married/cohabiting	<20000	Current smoking	Yes	Overweight	73	88	No	No
0	0	0	0	0	0	1	non-exposed	Han	53	male	Primary school and below	1	Married/cohabiting	<20000	Current smoking	Yes	Overweight	89.5	91	No	No
0	0	0	0	0	0	1	non-exposed	Han	52	male	Primary school and below	1	Married/cohabiting	<20000	Current smoking	Yes	Overweight	78.5	88.3	No	No
0	0	0	0	0	0	1	non-exposed	Han	52	male	Primary school and below	1	Married/cohabiting	<20000	Current smoking	Yes	Overweight	83	93	No	No
2	0	2	0	0	4	0	non-exposed	Han	52	male	Primary school and below	1	Married/cohabiting	<20000	Current smoking	Yes	Overweight	81	89.6	No	No
0	0	0	0	0	0	1	non-exposed	Han	52	male	Primary school and below	1	Married/cohabiting	<20000	Current smoking	Yes	Overweight	79	89	No	No
0	0	0	0	0	0	1	non-exposed	Han	51	male	Primary school and below	1	Married/cohabiting	<20000	Current smoking	Yes	Overweight	82.5	91.6	No	No
3	1	2	0	0	5	0	non-exposed	Han	51	male	Primary school and below	1	Married/cohabiting	<20000	Current smoking	Yes	Overweight	80	93.1	No	No
2	0	1	0	0	3	0	non-exposed	Han	51	male	Primary school and below	1	Married/cohabiting	<20000	Current smoking	Yes	Overweight	77	90	No	No
0	0	0	0	0	0	1	non-exposed	Han	51	male	Primary school and below	1	Married/cohabiting	<20000	Current smoking	Yes	Overweight	93	92	No	No
0	0	0	0	0	0	1	non-exposed	Han	50	male	Primary school and below	1	Married/cohabiting	<20000	Current smoking	Yes	Overweight	91	94.5	No	No
0	0	0	0	0	0	1	non-exposed	Han	50	male	Primary school and below	1	Married/cohabiting	<20000	Current smoking	Yes	Overweight	78.9	90	No	No
0	0	0	0	0	0	1	non-exposed	Han	50	male	Primary school and below	1	Married/cohabiting	<20000	Current smoking	Yes	Overweight	84	93	No	No
2	0	2	0	0	4	0	non-exposed	Han	50	male	Primary school and below	1	Married/cohabiting	<20000	Current smoking	Yes	Overweight	84	94	No	No
2	0	2	0	0	4	0	non-exposed	Han	50	male	Primary school and below	1	Married/cohabiting	<20000	Current smoking	Yes	Overweight	90.1	96	No	No
0	0	0	0	0	0	1	non-exposed	Han	49	male	Primary school and below	1	Married/cohabiting	<20000	Current smoking	Yes	Overweight	92	101	No	No
2	0	2	0	0	4	0	non-exposed	Han	49	male	Primary school and below	1	Married/cohabiting	<20000	Current smoking	Yes	Overweight	79	95	No	No
2	0	1	0	0	3	0	non-exposed	Han	49	male	Primary school and below	1	Married/cohabiting	<20000	Current smoking	Yes	Overweight	82	88	No	No
0	0	0	0	0	0	1	non-exposed	Han	49	male	Primary school and below	1	Married/cohabiting	<20000	Current smoking	Yes	Overweight	81	95	Yes	No
2	0	2	0	0	4	0	non-exposed	Han	48	male	Primary school and below	1	Married/cohabiting	<20000	Current smoking	Yes	Overweight	85	92.5	No	No
1	0	0	0	0	1	1	non-exposed	Han	48	male	Primary school and below	1	Married/cohabiting	<20000	Current smoking	Yes	Overweight	87.5	91	No	No
2	0	2	0	0	4	0	non-exposed	Han	48	male	Primary school and below	1	Married/cohabiting	<20000	Current smoking	Yes	Overweight	88	98	No	No
0	0	0	0	0	0	1	non-exposed	Han	47	male	Primary school and below	1	Married/cohabiting	<20000	Current smoking	Yes	Overweight	78.4	89.5	No	No
0	0	0	0	0	0	1	non-exposed	Han	47	male	Primary school and below	1	Married/cohabiting	<20000	Current smoking	Yes	Overweight	85	92.5	Yes	No
0	0	0	0	0	0	1	non-exposed	Han	47	male	Primary school and below	1	Married/cohabiting	<20000	Current smoking	Yes	Overweight	83	94	No	No
0	0	0	0	0	0	1	non-exposed	Han	46	male	Primary school and below	1	Married/cohabiting	<20000	Current smoking	Yes	Overweight	83	90	No	No
0	0	0	0	0	0	1	non-exposed	Han	46	male	Primary school and below	1	Married/cohabiting	<20000	Current smoking	Yes	Overweight	82	93	No	No
1	0	0	0	0	1	1	non-exposed	Han	46	male	Primary school and below	1	Married/cohabiting	<20000	Current smoking	Yes	Overweight	82	97	Yes	No
1	0	2	0	0	3	0	non-exposed	Han	45	male	Primary school and below	1	Married/cohabiting	<20000	Current smoking	Yes	Overweight	86	90	No	No
2	0	2	0	0	4	0	non-exposed	Han	45	male	Primary school and below	1	Married/cohabiting	<20000	Current smoking	Yes	Overweight	78	92.5	No	No
0	0	0	0	0	0	1	non-exposed	Han	45	male	Primary school and below	1	Married/cohabiting	<20000	Current smoking	Yes	Overweight	88	90	No	No
2	0	1	0	0	3	0	non-exposed	Han	45	male	Primary school and below	1	Married/cohabiting	<20000	Current smoking	Yes	Overweight	91	97	Yes	No
0	0	0	0	0	0	1	non-exposed	Han	45	male	Primary school and below	1	Married/cohabiting	<20000	Current smoking	Yes	Overweight	86	93	No	No
0	0	0	0	0	0	1	non-exposed	Han	44	male	Primary school and below	1	Married/cohabiting	<20000	Current smoking	Yes	Overweight	89	96	No	No
2	0	0	0	0	2	1	non-exposed	Han	44	male	Primary school and below	1	Married/cohabiting	<20000	Current smoking	Yes	Overweight	89.5	98	No	No
0	0	0	0	0	0	1	non-exposed	Han	44	male	Primary school and below	1	Married/cohabiting	<20000	Current smoking	Yes	Overweight	87	100	No	No
0	0	0	0	0	0	1	non-exposed	Han	44	male	Primary school and below	1	Married/cohabiting	<20000	Current smoking	Yes	Overweight	75.7	91	No	No
0	0	0	0	0	0	1	non-exposed	Han	43	male	Primary school and below	1	Married/cohabiting	<20000	Current smoking	Yes	Overweight	83.5	89.2	No	No
2	0	0	0	0	2	1	non-exposed	Han	42	male	Primary school and below	1	Married/cohabiting	<20000	Current smoking	Yes	Overweight	83.8	93	No	No
0	0	0	0	0	0	1	non-exposed	Han	42	male	Primary school and below	1	Married/cohabiting	<20000	Current smoking	Yes	Overweight	98.5	107	Yes	No
0	0	0	0	0	0	1	non-exposed	Han	42	male	Primary school and below	1	Married/cohabiting	<20000	Current smoking	Yes	Overweight	92	97	Yes	No
0	0	0	0	0	0	1	non-exposed	Han	41	male	Primary school and below	1	Married/cohabiting	<20000	Current smoking	Yes	Overweight	88.2	89.5	No	No
1	0	0	0	0	1	1	non-exposed	Han	41	male	Primary school and below	1	Married/cohabiting	<20000	Current smoking	Yes	Overweight	93.5	102.5	No	No
0	0	0	0	0	0	1	childhood exposure	Han	67	male	Middle school or high school	1	Married/cohabiting	<20000	Current smoking	Yes	Overweight	89.5	95.5	No	No
0	0	0	0	0	0	1	childhood exposure	Han	67	male	Middle school or high school	1	Married/cohabiting	<20000	Current smoking	Yes	Overweight	94.5	95	No	No
0	0	0	0	0	0	1	childhood exposure	Han	65	male	Middle school or high school	1	Married/cohabiting	<20000	Current smoking	Yes	Overweight	91.3	89.8	No	No
2	0	2	0	0	4	0	childhood exposure	Han	64	male	Middle school or high school	1	Married/cohabiting	<20000	Current smoking	Yes	Overweight	79	90	No	No
0	0	0	0	0	0	1	childhood exposure	Han	64	male	Middle school or high school	1	Married/cohabiting	<20000	Current smoking	Yes	Overweight	88	97	No	No
2	0	3	1	0	5	0	childhood exposure	Han	63	male	Middle school or high school	1	Married/cohabiting	<20000	Current smoking	Yes	Overweight	80	88	No	No
0	0	0	0	0	0	1	childhood exposure	Han	63	male	Middle school or high school	1	Married/cohabiting	<20000	Current smoking	Yes	Overweight	95	93	Yes	No
0	0	0	0	0	0	1	childhood exposure	Han	63	male	Middle school or high school	1	Married/cohabiting	<20000	Current smoking	Yes	Overweight	77.3	86.8	No	No
6	1	6	1	1	12	0	childhood exposure	Han	62	male	Middle school or high school	1	Married/cohabiting	<20000	Current smoking	Yes	Overweight	97	98	No	No
0	0	0	0	0	0	1	childhood exposure	Han	62	male	Middle school or high school	1	Married/cohabiting	<20000	Current smoking	Yes	Overweight	84	88	No	No
0	0	0	0	0	0	1	childhood exposure	Han	61	male	Middle school or high school	1	Married/cohabiting	<20000	Current smoking	Yes	Overweight	90	91	No	No
0	0	0	0	0	0	1	fetal exposure	Han	59	male	Middle school or high school	1	Married/cohabiting	<20000	Current smoking	Yes	Overweight	85	89.8	No	No
0	0	0	0	0	0	1	fetal exposure	Han	59	male	Middle school or high school	1	Married/cohabiting	<20000	Current smoking	Yes	Overweight	86	96	No	No
2	0	1	0	0	4	0	fetal exposure	Han	58	male	Middle school or high school	1	Married/cohabiting	<20000	Current smoking	Yes	Overweight	80	87	Yes	No
0	0	0	0	0	0	1	non-exposed	Han	56	male	Middle school or high school	1	Married/cohabiting	<20000	Current smoking	Yes	Overweight	87	89.5	No	No
0	0	0	0	0	0	1	non-exposed	Han	56	male	Middle school or high school	1	Married/cohabiting	<20000	Current smoking	Yes	Overweight	78	92	No	No
0	0	0	0	0	0	1	non-exposed	Han	56	male	Middle school or high school	1	Married/cohabiting	<20000	Current smoking	Yes	Overweight	97	97	No	No
2	0	2	0	0	4	0	non-exposed	Han	55	male	Middle school or high school	1	Married/cohabiting	<20000	Current smoking	Yes	Overweight	89	91	No	No
0	0	0	0	0	0	1	non-exposed	Han	54	male	Middle school or high school	1	Married/cohabiting	<20000	Current smoking	Yes	Overweight	86	88	No	No
2	0	2	0	0	4	0	non-exposed	Han	53	male	Middle school or high school	1	Married/cohabiting	<20000	Current smoking	Yes	Overweight	92	98	No	No
0	0	0	0	0	0	1	non-exposed	Han	52	male	Middle school or high school	1	Married/cohabiting	<20000	Current smoking	Yes	Overweight	81.2	85	No	No
0	0	0	0	0	0	1	non-exposed	Han	52	male	Middle school or high school	1	Married/cohabiting	<20000	Current smoking	Yes	Overweight	94	101	No	No
1	0	1	0	0	2	1	non-exposed	Han	51	male	Middle school or high school	1	Married/cohabiting	<20000	Current smoking	Yes	Overweight	93	96	No	No
2	0	1	0	0	3	0	non-exposed	Han	50	male	Middle school or high school	1	Married/cohabiting	<20000	Current smoking	Yes	Overweight	93	94	Yes	No
0	0	0	0	0	0	1	non-exposed	Han	49	male	Middle school or high school	1	Married/cohabiting	<20000	Current smoking	Yes	Overweight	93	101.5	No	No
0	0	0	0	0	0	1	non-exposed	Han	49	male	Middle school or high school	1	Married/cohabiting	<20000	Current smoking	Yes	Overweight	77	86	No	No
0	0	0	0	0	0	1	non-exposed	Han	48	male	Middle school or high school	1	Married/cohabiting	<20000	Current smoking	Yes	Overweight	75	94	No	No
1	0	0	0	0	1	1	non-exposed	Han	47	male	Middle school or high school	1	Married/cohabiting	<20000	Current smoking	Yes	Overweight	91	98	No	No
0	0	0	0	0	0	1	non-exposed	Han	47	male	Middle school or high school	1	Married/cohabiting	<20000	Current smoking	Yes	Overweight	85	95	No	No
0	0	0	0	0	0	1	non-exposed	Han	47	male	Middle school or high school	1	Married/cohabiting	<20000	Current smoking	Yes	Overweight	79	93.5	No	No
2	0	1	0	0	3	0	non-exposed	Han	46	male	Middle school or high school	1	Married/cohabiting	<20000	Current smoking	Yes	Overweight	90	98.5	No	No
0	0	1	0	0	1	1	non-exposed	Han	45	male	Middle school or high school	1	Married/cohabiting	<20000	Current smoking	Yes	Overweight	82.5	90	No	No
0	0	0	0	0	0	1	non-exposed	Han	45	male	Middle school or high school	1	Married/cohabiting	<20000	Current smoking	Yes	Overweight	84.5	95.7	No	No
0	0	0	0	0	0	1	non-exposed	Han	44	male	Middle school or high school	1	Married/cohabiting	<20000	Current smoking	Yes	Overweight	78	95	No	No
0	0	0	0	0	0	1	non-exposed	Han	43	male	Middle school or high school	1	Married/cohabiting	<20000	Current smoking	Yes	Overweight	94	98	No	No
0	0	0	0	0	0	1	non-exposed	Han	43	male	Middle school or high school	1	Married/cohabiting	<20000	Current smoking	Yes	Overweight	98.5	101.5	No	No
0	0	1	0	0	1	1	non-exposed	Han	43	male	Middle school or high school	1	Married/cohabiting	<20000	Current smoking	Yes	Overweight	87	103	No	No
0	0	0	0	0	0	1	non-exposed	Han	41	male	Middle school or high school	1	Married/cohabiting	<20000	Current smoking	Yes	Overweight	75	92.7	No	No
1	0	0	0	0	1	1	adolescent exposure	Han	74	male	Primary school and below	1	Married/cohabiting	20000~99999	Current smoking	Yes	Overweight	90.4	95.5	No	No
2	0	2	0	0	4	0	adolescent exposure	Han	70	male	Primary school and below	1	Married/cohabiting	20000~99999	Current smoking	Yes	Overweight	83.5	94	Yes	No
0	0	2	0	0	2	1	childhood exposure	Han	69	male	Primary school and below	1	Married/cohabiting	20000~99999	Current smoking	Yes	Overweight	89.3	93	No	No
0	0	0	0	0	0	1	childhood exposure	Han	66	male	Primary school and below	1	Married/cohabiting	20000~99999	Current smoking	Yes	Overweight	86	94	No	No
3	1	1	0	0	4	0	childhood exposure	Han	65	male	Primary school and below	1	Married/cohabiting	20000~99999	Current smoking	Yes	Overweight	78	87	Yes	No
2	0	2	0	0	4	0	childhood exposure	Han	65	male	Primary school and below	1	Married/cohabiting	20000~99999	Current smoking	Yes	Overweight	98.8	94.5	No	No
2	0	2	0	0	4	0	childhood exposure	Han	64	male	Primary school and below	1	Married/cohabiting	20000~99999	Current smoking	Yes	Overweight	94	101	Yes	No
0	0	0	0	0	0	1	childhood exposure	Han	63	male	Primary school and below	1	Married/cohabiting	20000~99999	Current smoking	Yes	Overweight	83	91	No	No
0	0	2	0	0	2	1	childhood exposure	Han	62	male	Primary school and below	1	Married/cohabiting	20000~99999	Current smoking	Yes	Overweight	88	99	Yes	No
0	0	0	0	0	0	1	childhood exposure	Han	62	male	Primary school and below	1	Married/cohabiting	20000~99999	Current smoking	Yes	Overweight	77	85	No	No
0	0	0	0	0	0	1	childhood exposure	Han	61	male	Primary school and below	1	Married/cohabiting	20000~99999	Current smoking	Yes	Overweight	88.5	88.2	No	No
0	0	0	0	0	0	1	childhood exposure	Han	61	male	Primary school and below	1	Married/cohabiting	20000~99999	Current smoking	Yes	Overweight	93.5	99	No	No
0	0	0	0	0	0	1	fetal exposure	Han	59	male	Primary school and below	1	Married/cohabiting	20000~99999	Current smoking	Yes	Overweight	84.5	91	Yes	No
0	0	0	0	0	0	1	non-exposed	Han	56	male	Primary school and below	1	Married/cohabiting	20000~99999	Current smoking	Yes	Overweight	85	92	No	No
0	0	0	0	0	0	1	non-exposed	Han	56	male	Primary school and below	1	Married/cohabiting	20000~99999	Current smoking	Yes	Overweight	87	86	No	No
0	0	0	0	0	0	1	non-exposed	Han	54	male	Primary school and below	1	Married/cohabiting	20000~99999	Current smoking	Yes	Overweight	90.5	96	No	No
1	0	0	0	0	1	1	non-exposed	Han	54	male	Primary school and below	1	Married/cohabiting	20000~99999	Current smoking	Yes	Overweight	80.5	90.6	No	No
2	0	0	0	0	2	1	non-exposed	Han	53	male	Primary school and below	1	Married/cohabiting	20000~99999	Current smoking	Yes	Overweight	90.5	98	No	No
0	0	0	0	0	0	1	non-exposed	Han	53	male	Primary school and below	1	Married/cohabiting	20000~99999	Current smoking	Yes	Overweight	103.5	106	No	No
0	0	0	0	0	0	1	non-exposed	Han	53	male	Primary school and below	1	Married/cohabiting	20000~99999	Current smoking	Yes	Overweight	82	87	No	No
0	0	1	0	0	1	1	non-exposed	Han	53	male	Primary school and below	1	Married/cohabiting	20000~99999	Current smoking	Yes	Overweight	78	89	No	No
0	0	1	0	0	1	1	non-exposed	Han	53	male	Primary school and below	1	Married/cohabiting	20000~99999	Current smoking	Yes	Overweight	82	97	No	No
0	0	0	0	0	0	1	non-exposed	Han	52	male	Primary school and below	1	Married/cohabiting	20000~99999	Current smoking	Yes	Overweight	86	94	No	No
0	0	0	0	0	0	1	non-exposed	Han	52	male	Primary school and below	1	Married/cohabiting	20000~99999	Current smoking	Yes	Overweight	81.5	95	No	No
0	0	0	0	0	0	1	non-exposed	Han	52	male	Primary school and below	1	Married/cohabiting	20000~99999	Current smoking	Yes	Overweight	88	94.5	No	No
2	0	1	0	0	3	0	non-exposed	Han	52	male	Primary school and below	1	Married/cohabiting	20000~99999	Current smoking	Yes	Overweight	94	103	No	No
1	0	0	0	0	1	1	non-exposed	Han	52	male	Primary school and below	1	Married/cohabiting	20000~99999	Current smoking	Yes	Overweight	87	89	No	No
2	0	2	0	0	4	0	non-exposed	Han	52	male	Primary school and below	1	Married/cohabiting	20000~99999	Current smoking	Yes	Overweight	80	95	No	No
2	0	6	1	0	8	0	non-exposed	Han	51	male	Primary school and below	1	Married/cohabiting	20000~99999	Current smoking	Yes	Overweight	85	96	No	No
2	0	1	0	0	3	0	non-exposed	Han	51	male	Primary school and below	1	Married/cohabiting	20000~99999	Current smoking	Yes	Overweight	82	86	No	No
0	0	0	0	0	0	1	non-exposed	Han	51	male	Primary school and below	1	Married/cohabiting	20000~99999	Current smoking	Yes	Overweight	93	97	No	No
1	0	1	0	0	2	1	non-exposed	Han	51	male	Primary school and below	1	Married/cohabiting	20000~99999	Current smoking	Yes	Overweight	80	86	No	No
0	0	0	0	0	0	1	non-exposed	Han	51	male	Primary school and below	1	Married/cohabiting	20000~99999	Current smoking	Yes	Overweight	86.5	90.8	No	No
2	0	0	0	0	2	1	non-exposed	Han	51	male	Primary school and below	1	Married/cohabiting	20000~99999	Current smoking	Yes	Overweight	84.5	91.5	No	No
0	0	0	0	0	0	1	non-exposed	Han	51	male	Primary school and below	1	Married/cohabiting	20000~99999	Current smoking	Yes	Overweight	92.5	100	No	No
0	0	0	0	0	0	1	non-exposed	Han	51	male	Primary school and below	1	Married/cohabiting	20000~99999	Current smoking	Yes	Overweight	80	90	No	No
0	0	0	0	0	0	1	non-exposed	Han	51	male	Primary school and below	1	Married/cohabiting	20000~99999	Current smoking	Yes	Overweight	91.5	99	No	No
1	0	6	1	0	7	0	non-exposed	Han	50	male	Primary school and below	1	Married/cohabiting	20000~99999	Current smoking	Yes	Overweight	75	89	No	No
2	0	2	0	0	4	0	non-exposed	Han	50	male	Primary school and below	1	Married/cohabiting	20000~99999	Current smoking	Yes	Overweight	87	91	No	No
0	0	0	0	0	0	1	non-exposed	Han	50	male	Primary school and below	1	Married/cohabiting	20000~99999	Current smoking	Yes	Overweight	86	92	No	No
0	0	0	0	0	0	1	non-exposed	Han	50	male	Primary school and below	1	Married/cohabiting	20000~99999	Current smoking	Yes	Overweight	80.5	91.5	No	No
1	0	2	0	0	3	0	non-exposed	Han	49	male	Primary school and below	1	Married/cohabiting	20000~99999	Current smoking	Yes	Overweight	84	91	No	No
0	0	0	0	0	0	1	non-exposed	Han	49	male	Primary school and below	1	Married/cohabiting	20000~99999	Current smoking	Yes	Overweight	80	92.5	No	No
0	0	0	0	0	0	1	non-exposed	Han	49	male	Primary school and below	1	Married/cohabiting	20000~99999	Current smoking	Yes	Overweight	86	90.5	No	No
2	0	1	0	0	3	0	non-exposed	Han	49	male	Primary school and below	1	Married/cohabiting	20000~99999	Current smoking	Yes	Overweight	83	91	No	No
0	0	0	0	0	0	1	non-exposed	Han	49	male	Primary school and below	1	Married/cohabiting	20000~99999	Current smoking	Yes	Overweight	85	92	No	No
0	0	0	0	0	0	1	non-exposed	Han	49	male	Primary school and below	1	Married/cohabiting	20000~99999	Current smoking	Yes	Overweight	88	94	No	No
2	0	1	0	0	3	0	non-exposed	Han	49	male	Primary school and below	1	Married/cohabiting	20000~99999	Current smoking	Yes	Overweight	76	91	No	No
0	0	0	0	0	0	1	non-exposed	Han	48	male	Primary school and below	1	Married/cohabiting	20000~99999	Current smoking	Yes	Overweight	77	89.8	No	No
0	0	0	0	0	0	1	non-exposed	Han	48	male	Primary school and below	1	Married/cohabiting	20000~99999	Current smoking	Yes	Overweight	79	91	No	No
0	0	1	0	0	1	1	non-exposed	Han	48	male	Primary school and below	1	Married/cohabiting	20000~99999	Current smoking	Yes	Overweight	73.5	89.5	No	No
0	0	0	0	0	0	1	non-exposed	Han	48	male	Primary school and below	1	Married/cohabiting	20000~99999	Current smoking	Yes	Overweight	79	85	No	No
0	0	0	0	0	0	1	non-exposed	Han	47	male	Primary school and below	1	Married/cohabiting	20000~99999	Current smoking	Yes	Overweight	89	97	No	No
0	0	1	0	0	1	1	non-exposed	Han	46	male	Primary school and below	1	Married/cohabiting	20000~99999	Current smoking	Yes	Overweight	94.3	92.7	No	No
0	0	0	0	0	0	1	non-exposed	Han	46	male	Primary school and below	1	Married/cohabiting	20000~99999	Current smoking	Yes	Overweight	76.4	94.3	No	No
2	0	2	0	0	4	0	non-exposed	Han	46	male	Primary school and below	1	Married/cohabiting	20000~99999	Current smoking	Yes	Overweight	82	89.5	No	No
0	0	0	0	0	0	1	non-exposed	Han	46	male	Primary school and below	1	Married/cohabiting	20000~99999	Current smoking	Yes	Overweight	77	86	No	No
1	0	0	0	0	1	1	non-exposed	Han	45	male	Primary school and below	1	Married/cohabiting	20000~99999	Current smoking	Yes	Overweight	78	92.5	No	No
0	0	2	0	0	2	1	non-exposed	Han	45	male	Primary school and below	1	Married/cohabiting	20000~99999	Current smoking	Yes	Overweight	89	96	No	No
1	0	0	0	0	1	1	non-exposed	Han	45	male	Primary school and below	1	Married/cohabiting	20000~99999	Current smoking	Yes	Overweight	82	102	No	No
0	0	2	0	0	2	1	non-exposed	Han	44	male	Primary school and below	1	Married/cohabiting	20000~99999	Current smoking	Yes	Overweight	85	91	No	No
0	0	0	0	0	0	1	non-exposed	Han	44	male	Primary school and below	1	Married/cohabiting	20000~99999	Current smoking	Yes	Overweight	81	83	No	No
0	0	0	0	0	0	1	non-exposed	Han	44	male	Primary school and below	1	Married/cohabiting	20000~99999	Current smoking	Yes	Overweight	74	87.5	No	No
0	0	1	0	0	1	1	childhood exposure	Han	68	male	Middle school or high school	1	Married/cohabiting	20000~99999	Current smoking	Yes	Overweight	90	93	Yes	No
0	0	0	0	0	0	1	childhood exposure	Han	68	male	Middle school or high school	1	Married/cohabiting	20000~99999	Current smoking	Yes	Overweight	86.5	88	Yes	No
2	0	0	0	0	2	1	childhood exposure	Han	66	male	Middle school or high school	1	Married/cohabiting	20000~99999	Current smoking	Yes	Overweight	78	87	No	No
0	0	0	0	0	0	1	childhood exposure	Han	66	male	Middle school or high school	1	Married/cohabiting	20000~99999	Current smoking	Yes	Overweight	88	92.4	No	No
0	0	0	0	0	0	1	childhood exposure	Han	65	male	Middle school or high school	1	Married/cohabiting	20000~99999	Current smoking	Yes	Overweight	82	88	Yes	No
0	0	0	0	0	0	1	childhood exposure	Han	63	male	Middle school or high school	1	Married/cohabiting	20000~99999	Current smoking	Yes	Overweight	79	89.2	No	No
0	0	0	0	0	0	1	childhood exposure	Han	62	male	Middle school or high school	1	Married/cohabiting	20000~99999	Current smoking	Yes	Overweight	76	86	Yes	No
0	0	0	0	0	0	1	childhood exposure	Han	62	male	Middle school or high school	1	Married/cohabiting	20000~99999	Current smoking	Yes	Overweight	92	96	No	No
3	1	3	1	1	6	0	childhood exposure	Han	61	male	Middle school or high school	1	Married/cohabiting	20000~99999	Current smoking	Yes	Overweight	83.4	93	No	No
2	0	2	0	0	4	0	childhood exposure	Han	61	male	Middle school or high school	1	Married/cohabiting	20000~99999	Current smoking	Yes	Overweight	79	92.6	No	No
0	0	0	0	0	0	1	childhood exposure	Han	61	male	Middle school or high school	1	Married/cohabiting	20000~99999	Current smoking	Yes	Overweight	83	92.5	No	No
0	0	0	0	0	0	1	childhood exposure	Han	61	male	Middle school or high school	1	Married/cohabiting	20000~99999	Current smoking	Yes	Overweight	84	90	Yes	No
2	0	2	0	0	4	0	childhood exposure	Han	61	male	Middle school or high school	1	Married/cohabiting	20000~99999	Current smoking	Yes	Overweight	82	90	No	No
0	0	0	0	0	0	1	childhood exposure	Han	61	male	Middle school or high school	1	Married/cohabiting	20000~99999	Current smoking	Yes	Overweight	85	95	No	No
0	0	0	0	0	0	1	fetal exposure	Han	59	male	Middle school or high school	1	Married/cohabiting	20000~99999	Current smoking	Yes	Overweight	84	93	No	No
1	0	2	0	0	3	0	fetal exposure	Han	59	male	Middle school or high school	1	Married/cohabiting	20000~99999	Current smoking	Yes	Overweight	84.5	94	No	No
0	0	0	0	0	0	1	fetal exposure	Han	59	male	Middle school or high school	1	Married/cohabiting	20000~99999	Current smoking	Yes	Overweight	83	94	No	No
2	0	2	0	0	4	0	fetal exposure	Han	59	male	Middle school or high school	1	Married/cohabiting	20000~99999	Current smoking	Yes	Overweight	90	98	No	No
2	0	1	0	0	3	0	fetal exposure	Han	59	male	Middle school or high school	1	Married/cohabiting	20000~99999	Current smoking	Yes	Overweight	92	93.5	No	No
2	0	2	0	0	4	0	fetal exposure	Han	58	male	Middle school or high school	1	Married/cohabiting	20000~99999	Current smoking	Yes	Overweight	84	91	Yes	No
2	0	1	0	0	3	0	fetal exposure	Han	58	male	Middle school or high school	1	Married/cohabiting	20000~99999	Current smoking	Yes	Overweight	87	94	Yes	No
0	0	0	0	0	0	1	non-exposed	Han	56	male	Middle school or high school	1	Married/cohabiting	20000~99999	Current smoking	Yes	Overweight	85	92	Yes	No
2	0	2	0	0	4	0	non-exposed	Han	56	male	Middle school or high school	1	Married/cohabiting	20000~99999	Current smoking	Yes	Overweight	87	83	Yes	No
0	0	0	0	0	0	1	non-exposed	Han	56	male	Middle school or high school	1	Married/cohabiting	20000~99999	Current smoking	Yes	Overweight	83	89	No	No
1	0	0	0	0	1	1	non-exposed	Han	56	male	Middle school or high school	1	Married/cohabiting	20000~99999	Current smoking	Yes	Overweight	87	95.5	No	No
1	0	2	0	0	3	0	non-exposed	Han	56	male	Middle school or high school	1	Married/cohabiting	20000~99999	Current smoking	Yes	Overweight	108	107.5	No	No
2	0	2	0	0	4	0	non-exposed	Han	56	male	Middle school or high school	1	Married/cohabiting	20000~99999	Current smoking	Yes	Overweight	83	94	No	No
0	0	0	0	0	0	1	non-exposed	Han	56	male	Middle school or high school	1	Married/cohabiting	20000~99999	Current smoking	Yes	Overweight	81	91	No	No
0	0	0	0	0	0	1	non-exposed	Han	56	male	Middle school or high school	1	Married/cohabiting	20000~99999	Current smoking	Yes	Overweight	91.5	93.5	No	No
0	0	0	0	0	0	1	non-exposed	Han	56	male	Middle school or high school	1	Married/cohabiting	20000~99999	Current smoking	Yes	Overweight	78	93	No	No
2	0	2	0	0	4	0	non-exposed	Han	55	male	Middle school or high school	1	Married/cohabiting	20000~99999	Current smoking	Yes	Overweight	86	92.5	No	No
0	0	0	0	0	0	1	non-exposed	Han	55	male	Middle school or high school	1	Married/cohabiting	20000~99999	Current smoking	Yes	Overweight	77.5	86.5	No	No
0	0	0	0	0	0	1	non-exposed	Han	55	male	Middle school or high school	1	Married/cohabiting	20000~99999	Current smoking	Yes	Overweight	89.5	98.5	No	No
1	0	0	0	0	1	1	non-exposed	Han	55	male	Middle school or high school	1	Married/cohabiting	20000~99999	Current smoking	Yes	Overweight	89.5	96	No	No
0	0	1	0	0	1	1	non-exposed	Han	54	male	Middle school or high school	1	Married/cohabiting	20000~99999	Current smoking	Yes	Overweight	75.5	90.5	No	No
0	0	0	0	0	0	1	non-exposed	Han	54	male	Middle school or high school	1	Married/cohabiting	20000~99999	Current smoking	Yes	Overweight	83.5	90.5	No	No
1	0	0	0	0	1	1	non-exposed	Han	54	male	Middle school or high school	1	Married/cohabiting	20000~99999	Current smoking	Yes	Overweight	87	86	No	No
0	0	0	0	0	0	1	non-exposed	Han	54	male	Middle school or high school	1	Married/cohabiting	20000~99999	Current smoking	Yes	Overweight	82	97	No	No
0	0	0	0	0	0	1	non-exposed	Han	54	male	Middle school or high school	1	Married/cohabiting	20000~99999	Current smoking	Yes	Overweight	74.5	92.5	No	No
0	0	0	0	0	0	1	non-exposed	Han	54	male	Middle school or high school	1	Married/cohabiting	20000~99999	Current smoking	Yes	Overweight	83	87	No	No
0	0	0	0	0	0	1	non-exposed	Han	53	male	Middle school or high school	1	Married/cohabiting	20000~99999	Current smoking	Yes	Overweight	95	99	No	No
1	0	2	0	0	3	0	non-exposed	Han	53	male	Middle school or high school	1	Married/cohabiting	20000~99999	Current smoking	Yes	Overweight	93	96	No	No
0	0	0	0	0	0	1	non-exposed	Han	53	male	Middle school or high school	1	Married/cohabiting	20000~99999	Current smoking	Yes	Overweight	75.5	90	No	No
2	0	0	0	0	2	1	non-exposed	Han	53	male	Middle school or high school	1	Married/cohabiting	20000~99999	Current smoking	Yes	Overweight	88	94	No	No
1	0	1	0	0	2	1	non-exposed	Han	52	male	Middle school or high school	1	Married/cohabiting	20000~99999	Current smoking	Yes	Overweight	80	90	No	No
2	0	1	0	0	3	0	non-exposed	Han	52	male	Middle school or high school	1	Married/cohabiting	20000~99999	Current smoking	Yes	Overweight	81	91	No	No
0	0	0	0	0	0	1	non-exposed	Han	51	male	Middle school or high school	1	Married/cohabiting	20000~99999	Current smoking	Yes	Overweight	97	94	No	No
1	0	2	0	0	3	0	non-exposed	Han	51	male	Middle school or high school	1	Married/cohabiting	20000~99999	Current smoking	Yes	Overweight	87	96	No	No
1	0	0	0	0	1	1	non-exposed	Han	51	male	Middle school or high school	1	Married/cohabiting	20000~99999	Current smoking	Yes	Overweight	98.7	99.2	No	No
0	0	0	0	0	0	1	non-exposed	Han	50	male	Middle school or high school	1	Married/cohabiting	20000~99999	Current smoking	Yes	Overweight	81	91	No	No
0	0	0	0	0	0	1	non-exposed	Han	50	male	Middle school or high school	1	Married/cohabiting	20000~99999	Current smoking	Yes	Overweight	80	93	No	No
0	0	0	0	0	0	1	non-exposed	Han	50	male	Middle school or high school	1	Married/cohabiting	20000~99999	Current smoking	Yes	Overweight	79	93	No	No
0	0	0	0	0	0	1	non-exposed	Han	50	male	Middle school or high school	1	Married/cohabiting	20000~99999	Current smoking	Yes	Overweight	85.7	98.5	No	No
2	0	1	0	0	3	0	non-exposed	Han	50	male	Middle school or high school	1	Married/cohabiting	20000~99999	Current smoking	Yes	Overweight	87	89	No	No
0	0	0	0	0	0	1	non-exposed	Han	49	male	Middle school or high school	1	Married/cohabiting	20000~99999	Current smoking	Yes	Overweight	84	91	No	No
0	0	0	0	0	0	1	non-exposed	Han	49	male	Middle school or high school	1	Married/cohabiting	20000~99999	Current smoking	Yes	Overweight	88	98	No	No
0	0	1	0	0	1	1	non-exposed	Han	49	male	Middle school or high school	1	Married/cohabiting	20000~99999	Current smoking	Yes	Overweight	84.5	92.5	No	No
6	1	5	1	1	11	0	non-exposed	Han	49	male	Middle school or high school	1	Married/cohabiting	20000~99999	Current smoking	Yes	Overweight	90	100	No	No
1	0	4	1	0	5	0	non-exposed	Han	48	male	Middle school or high school	1	Married/cohabiting	20000~99999	Current smoking	Yes	Overweight	85.8	90	No	No
0	0	0	0	0	0	1	non-exposed	Han	48	male	Middle school or high school	1	Married/cohabiting	20000~99999	Current smoking	Yes	Overweight	86	90.5	No	No
0	0	1	0	0	1	1	non-exposed	Han	48	male	Middle school or high school	1	Married/cohabiting	20000~99999	Current smoking	Yes	Overweight	77	91	No	No
0	0	1	0	0	1	1	non-exposed	Han	48	male	Middle school or high school	1	Married/cohabiting	20000~99999	Current smoking	Yes	Overweight	89	96	No	No
0	0	0	0	0	0	1	non-exposed	Han	47	male	Middle school or high school	1	Married/cohabiting	20000~99999	Current smoking	Yes	Overweight	83.5	95.8	No	No
0	0	0	0	0	0	1	non-exposed	Han	47	male	Middle school or high school	1	Married/cohabiting	20000~99999	Current smoking	Yes	Overweight	94	100	No	No
0	0	0	0	0	0	1	non-exposed	Han	47	male	Middle school or high school	1	Married/cohabiting	20000~99999	Current smoking	Yes	Overweight	84	89	No	No
0	0	0	0	0	0	1	non-exposed	Han	47	male	Middle school or high school	1	Married/cohabiting	20000~99999	Current smoking	Yes	Overweight	83	91.5	No	No
0	0	0	0	0	0	1	non-exposed	Han	47	male	Middle school or high school	1	Married/cohabiting	20000~99999	Current smoking	Yes	Overweight	86.5	95.5	No	No
1	0	1	0	0	2	1	non-exposed	Han	47	male	Middle school or high school	1	Married/cohabiting	20000~99999	Current smoking	Yes	Overweight	81.1	93.5	Yes	No
1	0	1	0	0	2	1	non-exposed	Han	46	male	Middle school or high school	1	Married/cohabiting	20000~99999	Current smoking	Yes	Overweight	87	95	No	No
2	0	0	0	0	2	1	non-exposed	Han	45	male	Middle school or high school	1	Married/cohabiting	20000~99999	Current smoking	Yes	Overweight	87	90	No	No
2	0	3	1	0	5	0	non-exposed	Han	45	male	Middle school or high school	1	Married/cohabiting	20000~99999	Current smoking	Yes	Overweight	86	92	No	No
0	0	0	0	0	0	1	non-exposed	Han	44	male	Middle school or high school	1	Married/cohabiting	20000~99999	Current smoking	Yes	Overweight	81	88	No	No
0	0	0	0	0	0	1	non-exposed	Han	44	male	Middle school or high school	1	Married/cohabiting	20000~99999	Current smoking	Yes	Overweight	88	95	No	No
0	0	0	0	0	0	1	non-exposed	Han	43	male	Middle school or high school	1	Married/cohabiting	20000~99999	Current smoking	Yes	Overweight	81	91	No	No
0	0	0	0	0	0	1	non-exposed	Han	43	male	Middle school or high school	1	Married/cohabiting	20000~99999	Current smoking	Yes	Overweight	88	93.5	No	No
0	0	0	0	0	0	1	non-exposed	Han	43	male	Middle school or high school	1	Married/cohabiting	20000~99999	Current smoking	Yes	Overweight	84	93	No	No
2	0	1	0	0	3	0	non-exposed	Han	42	male	Middle school or high school	1	Married/cohabiting	20000~99999	Current smoking	Yes	Overweight	89.5	102.5	No	No
3	1	5	1	1	8	0	non-exposed	Han	42	male	Middle school or high school	1	Married/cohabiting	20000~99999	Current smoking	Yes	Overweight	78.5	92.1	No	No
0	0	0	0	0	0	1	non-exposed	Han	42	male	Middle school or high school	1	Married/cohabiting	20000~99999	Current smoking	Yes	Overweight	89	95	No	No
0	0	0	0	0	0	1	non-exposed	Han	42	male	Middle school or high school	1	Married/cohabiting	20000~99999	Current smoking	Yes	Overweight	83	91	No	No
0	0	0	0	0	0	1	non-exposed	Han	42	male	Middle school or high school	1	Married/cohabiting	20000~99999	Current smoking	Yes	Overweight	83	87	No	No
1	0	1	0	0	2	1	non-exposed	Han	42	male	Middle school or high school	1	Married/cohabiting	20000~99999	Current smoking	Yes	Overweight	79	95	No	No
1	0	1	0	0	2	1	non-exposed	Han	42	male	Middle school or high school	1	Married/cohabiting	20000~99999	Current smoking	Yes	Overweight	91	99	No	No
0	0	0	0	0	0	1	non-exposed	Han	41	male	Middle school or high school	1	Married/cohabiting	20000~99999	Current smoking	Yes	Overweight	107	109	No	No
2	0	1	0	0	3	0	non-exposed	Han	41	male	Middle school or high school	1	Married/cohabiting	20000~99999	Current smoking	Yes	Overweight	90.8	93.5	No	No
0	0	0	0	0	0	1	non-exposed	Han	41	male	Middle school or high school	1	Married/cohabiting	20000~99999	Current smoking	Yes	Overweight	84.5	95.5	No	No
0	0	0	0	0	0	1	non-exposed	Han	41	male	Middle school or high school	1	Married/cohabiting	20000~99999	Current smoking	Yes	Overweight	83	101	No	No
0	0	0	0	0	0	1	non-exposed	Han	41	male	Middle school or high school	1	Married/cohabiting	20000~99999	Current smoking	Yes	Overweight	82	91	No	No
0	0	0	0	0	0	1	non-exposed	Han	41	male	Middle school or high school	1	Married/cohabiting	20000~99999	Current smoking	Yes	Overweight	85	91	No	No
0	0	0	0	0	0	1	non-exposed	Han	41	male	Middle school or high school	1	Married/cohabiting	20000~99999	Current smoking	Yes	Overweight	86.5	93.5	No	No
0	0	0	0	0	0	1	non-exposed	Han	45	male	University and above	1	Married/cohabiting	20000~99999	Current smoking	Yes	Overweight	81	91	No	No
0	0	0	0	0	0	1	non-exposed	Han	49	male	Primary school and below	1	Married/cohabiting	>1000000	Current smoking	Yes	Overweight	88	95	No	No
0	0	0	0	0	0	1	non-exposed	Han	49	male	Primary school and below	1	Married/cohabiting	>1000000	Current smoking	Yes	Overweight	78.5	94.5	No	No
0	0	2	0	0	2	1	non-exposed	Han	43	male	Primary school and below	1	Married/cohabiting	>1000000	Current smoking	Yes	Overweight	82	91	No	No
0	0	1	0	0	1	1	childhood exposure	Han	65	male	Middle school or high school	1	Married/cohabiting	>1000000	Current smoking	Yes	Overweight	93.5	101	No	No
0	0	0	0	0	0	1	childhood exposure	Han	64	male	Middle school or high school	1	Married/cohabiting	>1000000	Current smoking	Yes	Overweight	87	90	No	No
3	1	1	0	0	4	0	non-exposed	Han	48	male	Middle school or high school	1	Married/cohabiting	>1000000	Current smoking	Yes	Overweight	98	104	No	No
0	0	0	0	0	0	1	non-exposed	Han	54	male	University and above	1	Married/cohabiting	>1000000	Current smoking	Yes	Overweight	91	87.5	No	No
0	0	0	0	0	0	1	non-exposed	Han	46	male	University and above	1	Married/cohabiting	>1000000	Current smoking	Yes	Overweight	80	88	No	No
1	0	0	0	0	1	1	adolescent exposure	Han	72	male	Primary school and below	2	Married/cohabiting	<20000	Current smoking	Yes	Overweight	94.5	97	Yes	No
0	0	0	0	0	0	1	non-exposed	Han	49	male	Primary school and below	2	Married/cohabiting	<20000	Current smoking	Yes	Overweight	82.8	93	No	No
0	0	0	0	0	0	1	childhood exposure	Han	67	male	Middle school or high school	2	Married/cohabiting	<20000	Current smoking	Yes	Overweight	85	91.5	Yes	No
0	0	0	0	0	0	1	childhood exposure	Han	61	male	Middle school or high school	2	Married/cohabiting	<20000	Current smoking	Yes	Overweight	90	96.5	No	No
0	0	0	0	0	0	1	non-exposed	Han	51	male	Middle school or high school	2	Married/cohabiting	<20000	Current smoking	Yes	Overweight	82.4	90.2	Yes	No
0	0	0	0	0	0	1	non-exposed	Han	50	male	Middle school or high school	2	Married/cohabiting	<20000	Current smoking	Yes	Overweight	84.7	93	No	No
0	0	0	0	0	0	1	non-exposed	Han	47	male	Middle school or high school	2	Married/cohabiting	<20000	Current smoking	Yes	Overweight	93	97	No	No
0	0	0	0	0	0	1	childhood exposure	Han	63	male	University and above	2	Married/cohabiting	<20000	Current smoking	Yes	Overweight	90	95	No	No
0	0	0	0	0	0	1	adolescent exposure	Han	75	male	Primary school and below	2	Married/cohabiting	20000~99999	Current smoking	Yes	Overweight	78	92.5	No	No
0	0	0	0	0	0	1	childhood exposure	Han	68	male	Primary school and below	2	Married/cohabiting	20000~99999	Current smoking	Yes	Overweight	86	93	No	No
0	0	0	0	0	0	1	childhood exposure	Han	64	male	Primary school and below	2	Married/cohabiting	20000~99999	Current smoking	Yes	Overweight	91	100	No	No
1	0	2	0	0	3	0	childhood exposure	Han	62	male	Primary school and below	2	Married/cohabiting	20000~99999	Current smoking	Yes	Overweight	87	94	No	No
0	0	0	0	0	0	1	childhood exposure	Han	65	male	Middle school or high school	2	Married/cohabiting	20000~99999	Current smoking	Yes	Overweight	86	90	No	No
2	0	2	0	0	4	0	childhood exposure	Han	64	male	Middle school or high school	2	Married/cohabiting	20000~99999	Current smoking	Yes	Overweight	86	91	No	No
0	0	0	0	0	0	1	childhood exposure	Han	62	male	Middle school or high school	2	Married/cohabiting	20000~99999	Current smoking	Yes	Overweight	88	92.5	Yes	No
0	0	0	0	0	0	1	fetal exposure	Han	59	male	Middle school or high school	2	Married/cohabiting	20000~99999	Current smoking	Yes	Overweight	83	92.5	No	No
0	0	0	0	0	0	1	fetal exposure	Han	58	male	Middle school or high school	2	Married/cohabiting	20000~99999	Current smoking	Yes	Overweight	86	96	No	No
0	0	0	0	0	0	1	non-exposed	Han	54	male	Middle school or high school	2	Married/cohabiting	20000~99999	Current smoking	Yes	Overweight	94.2	95.2	Yes	No
0	0	0	0	0	0	1	non-exposed	Han	52	male	Middle school or high school	2	Married/cohabiting	20000~99999	Current smoking	Yes	Overweight	85.2	88.5	No	No
2	0	1	0	0	3	0	non-exposed	Han	52	male	Middle school or high school	2	Married/cohabiting	20000~99999	Current smoking	Yes	Overweight	99	102.5	No	No
3	1	0	0	0	3	0	non-exposed	Han	48	male	Middle school or high school	2	Married/cohabiting	20000~99999	Current smoking	Yes	Overweight	86	96	No	No
2	0	2	0	0	4	0	non-exposed	Han	47	male	Middle school or high school	2	Married/cohabiting	20000~99999	Current smoking	Yes	Overweight	92	101	No	No
2	0	1	0	0	3	0	non-exposed	Han	44	male	Middle school or high school	2	Married/cohabiting	20000~99999	Current smoking	Yes	Overweight	78	95	No	No
0	0	0	0	0	0	1	non-exposed	Han	44	male	Middle school or high school	2	Married/cohabiting	20000~99999	Current smoking	Yes	Overweight	99.6	99.5	No	No
1	0	0	0	0	1	1	non-exposed	Han	53	male	University and above	2	Married/cohabiting	20000~99999	Current smoking	Yes	Overweight	91	97	Yes	No
0	0	0	0	0	0	1	non-exposed	Han	45	male	University and above	2	Married/cohabiting	20000~99999	Current smoking	Yes	Overweight	84	94.6	No	No
0	0	0	0	0	0	1	non-exposed	Han	41	male	University and above	2	Married/cohabiting	20000~99999	Current smoking	Yes	Overweight	88	94	No	No
0	0	0	0	0	0	1	childhood exposure	Han	68	male	Middle school or high school	2	Married/cohabiting	>1000000	Current smoking	Yes	Overweight	81	92	No	No
0	0	0	0	0	0	1	childhood exposure	Han	64	male	Middle school or high school	2	Married/cohabiting	>1000000	Current smoking	Yes	Overweight	90	103	No	No
0	0	0	0	0	0	1	childhood exposure	Han	62	male	Middle school or high school	2	Married/cohabiting	>1000000	Current smoking	Yes	Overweight	108	112	Yes	No
2	0	2	0	0	4	0	non-exposed	Han	53	male	Middle school or high school	2	Married/cohabiting	>1000000	Current smoking	Yes	Overweight	99	100	No	No
0	0	0	0	0	0	1	non-exposed	Han	50	male	Middle school or high school	2	Married/cohabiting	>1000000	Current smoking	Yes	Overweight	80	89	No	No
0	0	0	0	0	0	1	non-exposed	Han	50	male	Middle school or high school	2	Married/cohabiting	>1000000	Current smoking	Yes	Overweight	78	90.8	No	No
0	0	0	0	0	0	1	non-exposed	Han	50	male	Middle school or high school	2	Married/cohabiting	>1000000	Current smoking	Yes	Overweight	83	90	No	No
0	0	0	0	0	0	1	non-exposed	Han	46	male	Middle school or high school	2	Married/cohabiting	>1000000	Current smoking	Yes	Overweight	88	99	No	No
0	0	0	0	0	0	1	non-exposed	Han	44	male	Middle school or high school	2	Married/cohabiting	>1000000	Current smoking	Yes	Overweight	86	103	No	No
0	0	0	0	0	0	1	non-exposed	Han	51	male	University and above	2	Married/cohabiting	>1000000	Current smoking	Yes	Overweight	85	96	No	No
0	0	0	0	0	0	1	non-exposed	Han	47	male	University and above	2	Married/cohabiting	>1000000	Current smoking	Yes	Overweight	84	93	No	No
0	0	0	0	0	0	1	non-exposed	Han	44	male	University and above	2	Married/cohabiting	>1000000	Current smoking	Yes	Overweight	84	94	No	No
0	0	0	0	0	0	1	non-exposed	Han	44	male	University and above	2	Married/cohabiting	>1000000	Current smoking	Yes	Overweight	89	95	No	No
2	0	2	0	0	4	0	non-exposed	Han	42	male	University and above	2	Married/cohabiting	>1000000	Current smoking	Yes	Overweight	80	90	No	No
1	0	0	0	0	1	1	childhood exposure	Han	64	male	Primary school and below	3	Married/cohabiting	<20000	Current smoking	Yes	Overweight	83	90.5	No	No
1	0	0	0	0	1	1	childhood exposure	Han	65	male	Middle school or high school	3	Married/cohabiting	20000~99999	Current smoking	Yes	Overweight	87	91.5	No	No
0	0	0	0	0	0	1	non-exposed	Han	50	male	University and above	3	Married/cohabiting	>1000000	Current smoking	Yes	Overweight	94	100	No	No
2	0	1	0	0	3	0	non-exposed	Han	43	male	University and above	3	Married/cohabiting	>1000000	Current smoking	Yes	Overweight	90	99	No	No
0	0	0	0	0	0	1	non-exposed	Han	47	male	Primary school and below	1	Separated/divorced	<20000	Current smoking	Yes	Overweight	79	92	No	No
1	0	1	0	0	2	1	non-exposed	Han	43	male	Middle school or high school	1	Separated/divorced	<20000	Current smoking	Yes	Overweight	91.7	94.5	No	No
1	0	2	0	0	3	0	non-exposed	Han	41	male	Middle school or high school	1	Separated/divorced	<20000	Current smoking	Yes	Overweight	82.5	97	No	No
2	0	0	0	0	2	1	non-exposed	Han	42	male	Middle school or high school	1	Separated/divorced	20000~99999	Current smoking	Yes	Overweight	83	89	No	No
0	0	0	0	0	0	1	non-exposed	Han	42	male	Middle school or high school	1	Separated/divorced	20000~99999	Current smoking	Yes	Overweight	86.1	92.2	No	No
0	0	0	0	0	0	1	non-exposed	Han	54	male	Middle school or high school	2	Separated/divorced	>1000000	Current smoking	Yes	Overweight	80	96	No	No
0	0	0	0	0	0	1	childhood exposure	Han	63	male	Primary school and below	1	Widowed spouse	<20000	Current smoking	Yes	Overweight	88	95	No	No
2	0	1	0	0	3	0	childhood exposure	Han	62	male	Middle school or high school	1	Widowed spouse	<20000	Current smoking	Yes	Overweight	93.8	97	Yes	No
0	0	0	0	0	0	1	fetal exposure	Han	59	male	Primary school and below	1	Widowed spouse	20000~99999	Current smoking	Yes	Overweight	70	86	No	No
0	0	0	0	0	0	1	non-exposed	Han	56	male	Primary school and below	1	Widowed spouse	20000~99999	Current smoking	Yes	Overweight	85	97	No	No
1	0	1	0	0	2	1	non-exposed	Han	50	male	Primary school and below	1	Widowed spouse	20000~99999	Current smoking	Yes	Overweight	94.5	97	No	No
0	0	0	0	0	0	1	non-exposed	Han	52	male	Middle school or high school	1	Widowed spouse	20000~99999	Current smoking	Yes	Overweight	81	88	No	No
1	0	1	0	0	2	1	non-exposed	Han	52	male	Primary school and below	1	Never married	<20000	Current smoking	Yes	Overweight	85	90	No	No
1	0	0	0	0	1	1	non-exposed	Han	46	male	Middle school or high school	1	Never married	<20000	Current smoking	Yes	Overweight	77.4	92.8	No	No
0	0	0	0	0	0	1	non-exposed	Han	79	male	Primary school and below	1	Married/cohabiting	<20000	Current smoking	Yes	Not overweight	69	85	No	No
1	0	2	0	0	3	0	non-exposed	Han	79	male	Primary school and below	1	Married/cohabiting	<20000	Current smoking	Yes	Not overweight	68	78	No	No
2	0	2	0	0	4	0	non-exposed	Han	76	male	Primary school and below	1	Married/cohabiting	<20000	Current smoking	Yes	Not overweight	65.5	84.5	No	No
2	0	0	0	0	2	1	adolescent exposure	Han	75	male	Primary school and below	1	Married/cohabiting	<20000	Current smoking	Yes	Not overweight	64.8	85	No	No
3	1	3	1	1	6	0	adolescent exposure	Han	74	male	Primary school and below	1	Married/cohabiting	<20000	Current smoking	Yes	Not overweight	80.5	87	No	No
0	0	1	0	0	1	1	adolescent exposure	Han	74	male	Primary school and below	1	Married/cohabiting	<20000	Current smoking	Yes	Not overweight	83	88	Yes	No
0	0	0	0	0	0	1	adolescent exposure	Han	74	male	Primary school and below	1	Married/cohabiting	<20000	Current smoking	Yes	Not overweight	67	84	No	No
0	0	0	0	0	0	1	adolescent exposure	Han	74	male	Primary school and below	1	Married/cohabiting	<20000	Current smoking	Yes	Not overweight	71	89	No	No
0	0	0	0	0	0	1	adolescent exposure	Han	74	male	Primary school and below	1	Married/cohabiting	<20000	Current smoking	Yes	Not overweight	78.5	87	No	No
0	0	0	0	0	0	1	adolescent exposure	Han	73	male	Primary school and below	1	Married/cohabiting	<20000	Current smoking	Yes	Not overweight	71	80.7	No	No
0	0	0	0	0	0	1	adolescent exposure	Han	73	male	Primary school and below	1	Married/cohabiting	<20000	Current smoking	Yes	Not overweight	73	87	No	No
2	0	2	0	0	4	0	adolescent exposure	Han	73	male	Primary school and below	1	Married/cohabiting	<20000	Current smoking	Yes	Not overweight	67	82	No	No
0	0	0	0	0	0	1	adolescent exposure	Han	73	male	Primary school and below	1	Married/cohabiting	<20000	Current smoking	Yes	Not overweight	67	84.5	No	No
0	0	0	0	0	0	1	adolescent exposure	Han	72	male	Primary school and below	1	Married/cohabiting	<20000	Current smoking	Yes	Not overweight	73	80	No	No
0	0	0	0	0	0	1	adolescent exposure	Han	72	male	Primary school and below	1	Married/cohabiting	<20000	Current smoking	Yes	Not overweight	69	82.5	No	No
0	0	0	0	0	0	1	adolescent exposure	Han	72	male	Primary school and below	1	Married/cohabiting	<20000	Current smoking	Yes	Not overweight	67	85	No	No
2	0	2	0	0	4	0	adolescent exposure	Han	72	male	Primary school and below	1	Married/cohabiting	<20000	Current smoking	Yes	Not overweight	78	91.5	No	No
0	0	0	0	0	0	1	adolescent exposure	Han	72	male	Primary school and below	1	Married/cohabiting	<20000	Current smoking	Yes	Not overweight	66	81.7	No	No
2	0	2	0	0	4	0	adolescent exposure	Han	71	male	Primary school and below	1	Married/cohabiting	<20000	Current smoking	Yes	Not overweight	58	76	Yes	No
2	0	1	0	0	3	0	adolescent exposure	Han	71	male	Primary school and below	1	Married/cohabiting	<20000	Current smoking	Yes	Not overweight	68.7	85	Yes	No
2	0	2	0	0	4	0	adolescent exposure	Han	71	male	Primary school and below	1	Married/cohabiting	<20000	Current smoking	Yes	Not overweight	61	84	No	No
2	0	1	0	0	3	0	adolescent exposure	Han	70	male	Primary school and below	1	Married/cohabiting	<20000	Current smoking	Yes	Not overweight	69	85	No	No
0	0	0	0	0	0	1	adolescent exposure	Han	70	male	Primary school and below	1	Married/cohabiting	<20000	Current smoking	Yes	Not overweight	70	82	No	No
0	0	0	0	0	0	1	childhood exposure	Han	69	male	Primary school and below	1	Married/cohabiting	<20000	Current smoking	Yes	Not overweight	65.4	81	No	No
0	0	0	0	0	0	1	childhood exposure	Han	69	male	Primary school and below	1	Married/cohabiting	<20000	Current smoking	Yes	Not overweight	67	84	No	No
2	0	2	0	0	4	0	childhood exposure	Han	67	male	Primary school and below	1	Married/cohabiting	<20000	Current smoking	Yes	Not overweight	77	88	No	No
0	0	0	0	0	0	1	childhood exposure	Han	67	male	Primary school and below	1	Married/cohabiting	<20000	Current smoking	Yes	Not overweight	72	82	No	No
2	0	0	0	0	2	1	childhood exposure	Han	67	male	Primary school and below	1	Married/cohabiting	<20000	Current smoking	Yes	Not overweight	75	78	No	No
0	0	1	0	0	1	1	childhood exposure	Han	67	male	Primary school and below	1	Married/cohabiting	<20000	Current smoking	Yes	Not overweight	80	86	No	No
2	0	2	0	0	4	0	childhood exposure	Han	66	male	Primary school and below	1	Married/cohabiting	<20000	Current smoking	Yes	Not overweight	80	93	No	No
1	0	1	0	0	2	1	childhood exposure	Han	66	male	Primary school and below	1	Married/cohabiting	<20000	Current smoking	Yes	Not overweight	74	90.5	No	No
2	0	0	0	0	2	1	childhood exposure	Han	66	male	Primary school and below	1	Married/cohabiting	<20000	Current smoking	Yes	Not overweight	73.5	84.4	No	No
0	0	0	0	0	0	1	childhood exposure	Han	66	male	Primary school and below	1	Married/cohabiting	<20000	Current smoking	Yes	Not overweight	71.5	91	No	No
1	0	0	0	0	1	1	childhood exposure	Han	66	male	Primary school and below	1	Married/cohabiting	<20000	Current smoking	Yes	Not overweight	69.5	83.2	No	No
0	0	0	0	0	0	1	childhood exposure	Han	66	male	Primary school and below	1	Married/cohabiting	<20000	Current smoking	Yes	Not overweight	71	88	No	No
2	0	1	0	0	3	0	childhood exposure	Han	65	male	Primary school and below	1	Married/cohabiting	<20000	Current smoking	Yes	Not overweight	70	81	No	No
0	0	0	0	0	0	1	childhood exposure	Han	65	male	Primary school and below	1	Married/cohabiting	<20000	Current smoking	Yes	Not overweight	67.8	83.3	No	No
0	0	0	0	0	0	1	childhood exposure	Han	65	male	Primary school and below	1	Married/cohabiting	<20000	Current smoking	Yes	Not overweight	77.5	86	Yes	No
2	0	2	0	0	4	0	childhood exposure	Han	64	male	Primary school and below	1	Married/cohabiting	<20000	Current smoking	Yes	Not overweight	70.2	86.5	No	No
1	0	0	0	0	1	1	childhood exposure	Han	64	male	Primary school and below	1	Married/cohabiting	<20000	Current smoking	Yes	Not overweight	73	85.3	No	No
2	0	2	0	0	4	0	childhood exposure	Han	64	male	Primary school and below	1	Married/cohabiting	<20000	Current smoking	Yes	Not overweight	83.5	95.8	No	No
1	0	1	0	0	2	1	childhood exposure	Han	64	male	Primary school and below	1	Married/cohabiting	<20000	Current smoking	Yes	Not overweight	67	87	No	No
0	0	0	0	0	0	1	childhood exposure	Han	64	male	Primary school and below	1	Married/cohabiting	<20000	Current smoking	Yes	Not overweight	66.5	79.2	No	No
0	0	0	0	0	0	1	childhood exposure	Han	64	male	Primary school and below	1	Married/cohabiting	<20000	Current smoking	Yes	Not overweight	69	79	No	No
1	0	0	0	0	1	1	childhood exposure	Han	64	male	Primary school and below	1	Married/cohabiting	<20000	Current smoking	Yes	Not overweight	70	84	No	No
0	0	0	0	0	0	1	childhood exposure	Han	64	male	Primary school and below	1	Married/cohabiting	<20000	Current smoking	Yes	Not overweight	73	86.2	No	No
1	0	1	0	0	2	1	childhood exposure	Han	64	male	Primary school and below	1	Married/cohabiting	<20000	Current smoking	Yes	Not overweight	64	80	No	No
1	0	1	0	0	2	1	childhood exposure	Han	64	male	Primary school and below	1	Married/cohabiting	<20000	Current smoking	Yes	Not overweight	74.2	86.7	No	No
1	0	0	0	0	1	1	childhood exposure	Han	64	male	Primary school and below	1	Married/cohabiting	<20000	Current smoking	Yes	Not overweight	66	88	Yes	No
2	0	0	0	0	2	1	childhood exposure	Han	63	male	Primary school and below	1	Married/cohabiting	<20000	Current smoking	Yes	Not overweight	65	84	No	No
2	0	4	1	0	6	0	childhood exposure	Han	63	male	Primary school and below	1	Married/cohabiting	<20000	Current smoking	Yes	Not overweight	73	82	No	No
2	0	2	0	0	4	0	childhood exposure	Han	63	male	Primary school and below	1	Married/cohabiting	<20000	Current smoking	Yes	Not overweight	68	87.5	No	No
0	0	0	0	0	0	1	childhood exposure	Han	63	male	Primary school and below	1	Married/cohabiting	<20000	Current smoking	Yes	Not overweight	82.5	92	No	No
0	0	0	0	0	0	1	childhood exposure	Han	63	male	Primary school and below	1	Married/cohabiting	<20000	Current smoking	Yes	Not overweight	79	88	No	No
0	0	0	0	0	0	1	childhood exposure	Han	62	male	Primary school and below	1	Married/cohabiting	<20000	Current smoking	Yes	Not overweight	72.5	88.5	No	No
2	0	0	0	0	2	1	childhood exposure	Han	62	male	Primary school and below	1	Married/cohabiting	<20000	Current smoking	Yes	Not overweight	66.5	81.3	No	No
0	0	0	0	0	0	1	childhood exposure	Han	62	male	Primary school and below	1	Married/cohabiting	<20000	Current smoking	Yes	Not overweight	79	87.5	Yes	No
0	0	0	0	0	0	1	childhood exposure	Han	62	male	Primary school and below	1	Married/cohabiting	<20000	Current smoking	Yes	Not overweight	72	80	No	No
0	0	0	0	0	0	1	childhood exposure	Han	62	male	Primary school and below	1	Married/cohabiting	<20000	Current smoking	Yes	Not overweight	70.5	84.2	No	No
3	1	3	1	1	6	0	childhood exposure	Han	62	male	Primary school and below	1	Married/cohabiting	<20000	Current smoking	Yes	Not overweight	70	87	No	No
0	0	2	0	0	2	1	childhood exposure	Han	62	male	Primary school and below	1	Married/cohabiting	<20000	Current smoking	Yes	Not overweight	73	88	No	No
2	0	2	0	0	4	0	childhood exposure	Han	61	male	Primary school and below	1	Married/cohabiting	<20000	Current smoking	Yes	Not overweight	74	92.5	No	No
1	0	1	0	0	2	1	childhood exposure	Han	61	male	Primary school and below	1	Married/cohabiting	<20000	Current smoking	Yes	Not overweight	70	81	No	No
0	0	0	0	0	0	1	childhood exposure	Han	61	male	Primary school and below	1	Married/cohabiting	<20000	Current smoking	Yes	Not overweight	66	80	No	No
0	0	0	0	0	0	1	childhood exposure	Han	61	male	Primary school and below	1	Married/cohabiting	<20000	Current smoking	Yes	Not overweight	81	88.8	No	No
1	0	1	0	0	2	1	fetal exposure	Han	59	male	Primary school and below	1	Married/cohabiting	<20000	Current smoking	Yes	Not overweight	76.7	88.8	No	No
0	0	0	0	0	0	1	fetal exposure	Han	59	male	Primary school and below	1	Married/cohabiting	<20000	Current smoking	Yes	Not overweight	62.5	78	No	No
0	0	0	0	0	0	1	fetal exposure	Han	59	male	Primary school and below	1	Married/cohabiting	<20000	Current smoking	Yes	Not overweight	76.5	91.5	No	No
0	0	0	0	0	0	1	fetal exposure	Han	59	male	Primary school and below	1	Married/cohabiting	<20000	Current smoking	Yes	Not overweight	71	81	No	No
3	1	4	1	1	0	1	fetal exposure	Han	58	male	Primary school and below	1	Married/cohabiting	<20000	Current smoking	Yes	Not overweight	75	89	No	No
0	0	0	0	0	0	1	non-exposed	Han	56	male	Primary school and below	1	Married/cohabiting	<20000	Current smoking	Yes	Not overweight	76	84	No	No
0	0	0	0	0	0	1	non-exposed	Han	56	male	Primary school and below	1	Married/cohabiting	<20000	Current smoking	Yes	Not overweight	68.5	82.7	No	No
0	0	0	0	0	0	1	non-exposed	Han	56	male	Primary school and below	1	Married/cohabiting	<20000	Current smoking	Yes	Not overweight	70	86	No	No
0	0	1	0	0	1	1	non-exposed	Han	56	male	Primary school and below	1	Married/cohabiting	<20000	Current smoking	Yes	Not overweight	68	90.5	No	No
0	0	0	0	0	0	1	non-exposed	Han	56	male	Primary school and below	1	Married/cohabiting	<20000	Current smoking	Yes	Not overweight	75	80.8	No	No
0	0	0	0	0	0	1	non-exposed	Han	56	male	Primary school and below	1	Married/cohabiting	<20000	Current smoking	Yes	Not overweight	69	82	No	No
0	0	0	0	0	0	1	non-exposed	Han	56	male	Primary school and below	1	Married/cohabiting	<20000	Current smoking	Yes	Not overweight	92	90	No	No
2	0	1	0	0	3	0	non-exposed	Han	56	male	Primary school and below	1	Married/cohabiting	<20000	Current smoking	Yes	Not overweight	69	89	Yes	No
0	0	0	0	0	0	1	non-exposed	Han	56	male	Primary school and below	1	Married/cohabiting	<20000	Current smoking	Yes	Not overweight	74	86	No	No
0	0	0	0	0	0	1	non-exposed	Han	55	male	Primary school and below	1	Married/cohabiting	<20000	Current smoking	Yes	Not overweight	72.3	82	No	No
2	0	0	0	0	2	1	non-exposed	Han	55	male	Primary school and below	1	Married/cohabiting	<20000	Current smoking	Yes	Not overweight	71	85	No	No
2	0	0	0	0	2	1	non-exposed	Han	55	male	Primary school and below	1	Married/cohabiting	<20000	Current smoking	Yes	Not overweight	80	89	No	No
0	0	0	0	0	0	1	non-exposed	Han	55	male	Primary school and below	1	Married/cohabiting	<20000	Current smoking	Yes	Not overweight	62.5	82.5	No	No
0	0	0	0	0	0	1	non-exposed	Han	55	male	Primary school and below	1	Married/cohabiting	<20000	Current smoking	Yes	Not overweight	81	90.5	No	No
0	0	0	0	0	0	1	non-exposed	Han	55	male	Primary school and below	1	Married/cohabiting	<20000	Current smoking	Yes	Not overweight	74.5	84.2	No	No
0	0	0	0	0	0	1	non-exposed	Han	55	male	Primary school and below	1	Married/cohabiting	<20000	Current smoking	Yes	Not overweight	72.2	83.4	No	No
1	0	2	0	0	3	0	non-exposed	Han	54	male	Primary school and below	1	Married/cohabiting	<20000	Current smoking	Yes	Not overweight	75	89	No	No
2	0	2	0	0	4	0	non-exposed	Han	54	male	Primary school and below	1	Married/cohabiting	<20000	Current smoking	Yes	Not overweight	74	86.6	No	No
0	0	0	0	0	0	1	non-exposed	Han	54	male	Primary school and below	1	Married/cohabiting	<20000	Current smoking	Yes	Not overweight	75	86	No	No
0	0	0	0	0	0	1	non-exposed	Han	54	male	Primary school and below	1	Married/cohabiting	<20000	Current smoking	Yes	Not overweight	62	80	No	No
1	0	0	0	0	1	1	non-exposed	Han	54	male	Primary school and below	1	Married/cohabiting	<20000	Current smoking	Yes	Not overweight	78.5	86	No	No
0	0	0	0	0	0	1	non-exposed	Han	53	male	Primary school and below	1	Married/cohabiting	<20000	Current smoking	Yes	Not overweight	75	90	No	No
0	0	1	0	0	1	1	non-exposed	Han	53	male	Primary school and below	1	Married/cohabiting	<20000	Current smoking	Yes	Not overweight	71	90	No	No
2	0	2	0	0	4	0	non-exposed	Han	53	male	Primary school and below	1	Married/cohabiting	<20000	Current smoking	Yes	Not overweight	83	95	No	No
0	0	0	0	0	0	1	non-exposed	Han	53	male	Primary school and below	1	Married/cohabiting	<20000	Current smoking	Yes	Not overweight	75	93	No	No
0	0	1	0	0	1	1	non-exposed	Han	53	male	Primary school and below	1	Married/cohabiting	<20000	Current smoking	Yes	Not overweight	82	83	No	No
0	0	0	0	0	0	1	non-exposed	Han	53	male	Primary school and below	1	Married/cohabiting	<20000	Current smoking	Yes	Not overweight	75	86	No	No
0	0	0	0	0	0	1	non-exposed	Han	53	male	Primary school and below	1	Married/cohabiting	<20000	Current smoking	Yes	Not overweight	68.5	84	No	No
0	0	0	0	0	0	1	non-exposed	Han	53	male	Primary school and below	1	Married/cohabiting	<20000	Current smoking	Yes	Not overweight	70.8	85.4	No	No
2	0	1	0	0	3	0	non-exposed	Han	52	male	Primary school and below	1	Married/cohabiting	<20000	Current smoking	Yes	Not overweight	76	89	No	No
0	0	0	0	0	0	1	non-exposed	Han	52	male	Primary school and below	1	Married/cohabiting	<20000	Current smoking	Yes	Not overweight	64.5	76	No	No
2	0	2	0	0	4	0	non-exposed	Han	52	male	Primary school and below	1	Married/cohabiting	<20000	Current smoking	Yes	Not overweight	74	90	No	No
0	0	0	0	0	0	1	non-exposed	Han	52	male	Primary school and below	1	Married/cohabiting	<20000	Current smoking	Yes	Not overweight	80.5	90	No	No
0	0	0	0	0	0	1	non-exposed	Han	52	male	Primary school and below	1	Married/cohabiting	<20000	Current smoking	Yes	Not overweight	69	84	No	No
2	0	2	0	0	4	0	non-exposed	Han	52	male	Primary school and below	1	Married/cohabiting	<20000	Current smoking	Yes	Not overweight	67.7	85	No	No
2	0	2	0	0	4	0	non-exposed	Han	52	male	Primary school and below	1	Married/cohabiting	<20000	Current smoking	Yes	Not overweight	74.5	88	No	No
0	0	0	0	0	0	1	non-exposed	Han	52	male	Primary school and below	1	Married/cohabiting	<20000	Current smoking	Yes	Not overweight	64	73	No	No
0	0	1	0	0	1	1	non-exposed	Han	52	male	Primary school and below	1	Married/cohabiting	<20000	Current smoking	Yes	Not overweight	64	81	No	No
3	1	0	0	0	3	0	non-exposed	Han	52	male	Primary school and below	1	Married/cohabiting	<20000	Current smoking	Yes	Not overweight	72	92	No	No
0	0	0	0	0	0	1	non-exposed	Han	51	male	Primary school and below	1	Married/cohabiting	<20000	Current smoking	Yes	Not overweight	72	85	No	No
1	0	0	0	0	1	1	non-exposed	Han	51	male	Primary school and below	1	Married/cohabiting	<20000	Current smoking	Yes	Not overweight	71.8	87.4	No	No
0	0	0	0	0	0	1	non-exposed	Han	51	male	Primary school and below	1	Married/cohabiting	<20000	Current smoking	Yes	Not overweight	73	82.8	No	No
2	0	1	0	0	3	0	non-exposed	Han	51	male	Primary school and below	1	Married/cohabiting	<20000	Current smoking	Yes	Not overweight	69.4	85	No	No
0	0	0	0	0	0	1	non-exposed	Han	51	male	Primary school and below	1	Married/cohabiting	<20000	Current smoking	Yes	Not overweight	65.4	84.3	No	No
1	0	0	0	0	1	1	non-exposed	Han	51	male	Primary school and below	1	Married/cohabiting	<20000	Current smoking	Yes	Not overweight	69	85.2	No	No
0	0	0	0	0	0	1	non-exposed	Han	50	male	Primary school and below	1	Married/cohabiting	<20000	Current smoking	Yes	Not overweight	80.5	91.5	No	No
2	0	2	0	0	4	0	non-exposed	Han	50	male	Primary school and below	1	Married/cohabiting	<20000	Current smoking	Yes	Not overweight	71	84	No	No
0	0	0	0	0	0	1	non-exposed	Han	50	male	Primary school and below	1	Married/cohabiting	<20000	Current smoking	Yes	Not overweight	60	84	No	No
0	0	0	0	0	0	1	non-exposed	Han	50	male	Primary school and below	1	Married/cohabiting	<20000	Current smoking	Yes	Not overweight	63	91	Yes	No
0	0	0	0	0	0	1	non-exposed	Han	50	male	Primary school and below	1	Married/cohabiting	<20000	Current smoking	Yes	Not overweight	72	85	No	No
0	0	0	0	0	0	1	non-exposed	Han	50	male	Primary school and below	1	Married/cohabiting	<20000	Current smoking	Yes	Not overweight	75	87	No	No
0	0	0	0	0	0	1	non-exposed	Han	49	male	Primary school and below	1	Married/cohabiting	<20000	Current smoking	Yes	Not overweight	73.1	87	No	No
0	0	2	0	0	2	1	non-exposed	Han	49	male	Primary school and below	1	Married/cohabiting	<20000	Current smoking	Yes	Not overweight	73	84	No	No
2	0	1	0	0	3	0	non-exposed	Han	49	male	Primary school and below	1	Married/cohabiting	<20000	Current smoking	Yes	Not overweight	84	95	No	No
1	0	0	0	0	1	1	non-exposed	Han	49	male	Primary school and below	1	Married/cohabiting	<20000	Current smoking	Yes	Not overweight	68.8	82.1	No	No
0	0	2	0	0	2	1	non-exposed	Han	49	male	Primary school and below	1	Married/cohabiting	<20000	Current smoking	Yes	Not overweight	82.5	95	No	No
0	0	0	0	0	0	1	non-exposed	Han	48	male	Primary school and below	1	Married/cohabiting	<20000	Current smoking	Yes	Not overweight	60.8	77	No	No
1	0	2	0	0	3	0	non-exposed	Han	48	male	Primary school and below	1	Married/cohabiting	<20000	Current smoking	Yes	Not overweight	78.8	90.4	No	No
0	0	0	0	0	0	1	non-exposed	Han	48	male	Primary school and below	1	Married/cohabiting	<20000	Current smoking	Yes	Not overweight	69.5	88.5	No	No
1	0	2	0	0	3	0	non-exposed	Han	48	male	Primary school and below	1	Married/cohabiting	<20000	Current smoking	Yes	Not overweight	59	77	No	No
0	0	0	0	0	0	1	non-exposed	Han	48	male	Primary school and below	1	Married/cohabiting	<20000	Current smoking	Yes	Not overweight	69.4	89.8	No	No
0	0	2	0	0	2	1	non-exposed	Han	48	male	Primary school and below	1	Married/cohabiting	<20000	Current smoking	Yes	Not overweight	75.5	88	No	No
1	0	1	0	0	2	1	non-exposed	Han	48	male	Primary school and below	1	Married/cohabiting	<20000	Current smoking	Yes	Not overweight	74	84	No	No
2	0	1	0	0	3	0	non-exposed	Han	47	male	Primary school and below	1	Married/cohabiting	<20000	Current smoking	Yes	Not overweight	77	90	No	No
0	0	0	0	0	0	1	non-exposed	Han	47	male	Primary school and below	1	Married/cohabiting	<20000	Current smoking	Yes	Not overweight	68	80	No	No
0	0	0	0	0	0	1	non-exposed	Han	47	male	Primary school and below	1	Married/cohabiting	<20000	Current smoking	Yes	Not overweight	82	83	No	No
0	0	0	0	0	0	1	non-exposed	Han	46	male	Primary school and below	1	Married/cohabiting	<20000	Current smoking	Yes	Not overweight	71.5	86	No	No
1	0	1	0	0	2	1	non-exposed	Han	46	male	Primary school and below	1	Married/cohabiting	<20000	Current smoking	Yes	Not overweight	77	88	No	No
1	0	0	0	0	1	1	non-exposed	Han	46	male	Primary school and below	1	Married/cohabiting	<20000	Current smoking	Yes	Not overweight	76	88	No	No
0	0	2	0	0	2	1	non-exposed	Han	46	male	Primary school and below	1	Married/cohabiting	<20000	Current smoking	Yes	Not overweight	70.3	86.2	No	No
0	0	1	0	0	1	1	non-exposed	Han	46	male	Primary school and below	1	Married/cohabiting	<20000	Current smoking	Yes	Not overweight	74.5	91	No	No
2	0	0	0	0	2	1	non-exposed	Han	46	male	Primary school and below	1	Married/cohabiting	<20000	Current smoking	Yes	Not overweight	88	93	No	No
0	0	0	0	0	0	1	non-exposed	Han	45	male	Primary school and below	1	Married/cohabiting	<20000	Current smoking	Yes	Not overweight	66.5	85	No	No
0	0	0	0	0	0	1	non-exposed	Han	45	male	Primary school and below	1	Married/cohabiting	<20000	Current smoking	Yes	Not overweight	73	88.5	No	No
2	0	2	0	0	4	0	non-exposed	Han	45	male	Primary school and below	1	Married/cohabiting	<20000	Current smoking	Yes	Not overweight	85	90	No	No
0	0	0	0	0	0	1	non-exposed	Han	45	male	Primary school and below	1	Married/cohabiting	<20000	Current smoking	Yes	Not overweight	75.3	85.5	No	No
0	0	0	0	0	0	1	non-exposed	Han	44	male	Primary school and below	1	Married/cohabiting	<20000	Current smoking	Yes	Not overweight	67	80	No	No
0	0	0	0	0	0	1	non-exposed	Han	44	male	Primary school and below	1	Married/cohabiting	<20000	Current smoking	Yes	Not overweight	74.5	84.5	No	No
2	0	1	0	0	3	0	non-exposed	Han	44	male	Primary school and below	1	Married/cohabiting	<20000	Current smoking	Yes	Not overweight	64.5	83.5	No	No
0	0	0	0	0	0	1	non-exposed	Han	43	male	Primary school and below	1	Married/cohabiting	<20000	Current smoking	Yes	Not overweight	73.2	80.1	No	No
1	0	0	0	0	1	1	non-exposed	Han	43	male	Primary school and below	1	Married/cohabiting	<20000	Current smoking	Yes	Not overweight	75	81	No	No
0	0	0	0	0	0	1	non-exposed	Han	43	male	Primary school and below	1	Married/cohabiting	<20000	Current smoking	Yes	Not overweight	79	95	No	No
2	0	2	0	0	4	0	non-exposed	Han	43	male	Primary school and below	1	Married/cohabiting	<20000	Current smoking	Yes	Not overweight	65	82	No	No
2	0	2	0	0	4	0	non-exposed	Han	42	male	Primary school and below	1	Married/cohabiting	<20000	Current smoking	Yes	Not overweight	84	96	No	No
0	0	0	0	0	0	1	non-exposed	Han	42	male	Primary school and below	1	Married/cohabiting	<20000	Current smoking	Yes	Not overweight	62.5	84.5	No	No
0	0	0	0	0	0	1	non-exposed	Han	42	male	Primary school and below	1	Married/cohabiting	<20000	Current smoking	Yes	Not overweight	64.1	79.5	No	No
2	0	0	0	0	2	1	non-exposed	Han	42	male	Primary school and below	1	Married/cohabiting	<20000	Current smoking	Yes	Not overweight	74	90	No	No
0	0	0	0	0	0	1	non-exposed	Han	79	male	Middle school or high school	1	Married/cohabiting	<20000	Current smoking	Yes	Not overweight	71	89	No	No
0	0	0	0	0	0	1	adolescent exposure	Han	75	male	Middle school or high school	1	Married/cohabiting	<20000	Current smoking	Yes	Not overweight	77	87.5	No	No
0	0	0	0	0	0	1	adolescent exposure	Han	72	male	Middle school or high school	1	Married/cohabiting	<20000	Current smoking	Yes	Not overweight	86	84	No	No
2	0	2	0	0	4	0	adolescent exposure	Han	70	male	Middle school or high school	1	Married/cohabiting	<20000	Current smoking	Yes	Not overweight	75	92	No	No
0	0	0	0	0	0	1	childhood exposure	Han	68	male	Middle school or high school	1	Married/cohabiting	<20000	Current smoking	Yes	Not overweight	80	87	Yes	No
0	0	0	0	0	0	1	childhood exposure	Han	68	male	Middle school or high school	1	Married/cohabiting	<20000	Current smoking	Yes	Not overweight	75.5	87.8	No	No
0	0	0	0	0	0	1	childhood exposure	Han	67	male	Middle school or high school	1	Married/cohabiting	<20000	Current smoking	Yes	Not overweight	79	92	No	No
0	0	0	0	0	0	1	childhood exposure	Han	67	male	Middle school or high school	1	Married/cohabiting	<20000	Current smoking	Yes	Not overweight	72.8	87.5	No	No
1	0	0	0	0	1	1	childhood exposure	Han	66	male	Middle school or high school	1	Married/cohabiting	<20000	Current smoking	Yes	Not overweight	80	94	No	No
4	1	4	1	1	8	0	childhood exposure	Han	66	male	Middle school or high school	1	Married/cohabiting	<20000	Current smoking	Yes	Not overweight	72.7	87	No	No
0	0	0	0	0	0	1	childhood exposure	Han	66	male	Middle school or high school	1	Married/cohabiting	<20000	Current smoking	Yes	Not overweight	72	84	No	No
2	0	1	0	0	3	0	childhood exposure	Han	66	male	Middle school or high school	1	Married/cohabiting	<20000	Current smoking	Yes	Not overweight	61	78	No	No
1	0	1	0	0	2	1	childhood exposure	Han	65	male	Middle school or high school	1	Married/cohabiting	<20000	Current smoking	Yes	Not overweight	74	84	No	No
0	0	0	0	0	0	1	childhood exposure	Han	65	male	Middle school or high school	1	Married/cohabiting	<20000	Current smoking	Yes	Not overweight	86	92.5	Yes	No
2	0	2	0	0	4	0	childhood exposure	Han	65	male	Middle school or high school	1	Married/cohabiting	<20000	Current smoking	Yes	Not overweight	75	90	No	No
0	0	4	1	0	4	0	childhood exposure	Han	65	male	Middle school or high school	1	Married/cohabiting	<20000	Current smoking	Yes	Not overweight	76.3	88.2	No	No
0	0	0	0	0	0	1	childhood exposure	Han	64	male	Middle school or high school	1	Married/cohabiting	<20000	Current smoking	Yes	Not overweight	80	87	No	No
0	0	1	0	0	1	1	childhood exposure	Han	64	male	Middle school or high school	1	Married/cohabiting	<20000	Current smoking	Yes	Not overweight	67	83	No	No
2	0	1	0	0	3	0	childhood exposure	Han	64	male	Middle school or high school	1	Married/cohabiting	<20000	Current smoking	Yes	Not overweight	72	82	No	No
0	0	0	0	0	0	1	childhood exposure	Han	64	male	Middle school or high school	1	Married/cohabiting	<20000	Current smoking	Yes	Not overweight	70	88	No	No
0	0	0	0	0	0	1	childhood exposure	Han	64	male	Middle school or high school	1	Married/cohabiting	<20000	Current smoking	Yes	Not overweight	84	90.5	No	No
1	0	1	0	0	2	1	childhood exposure	Han	63	male	Middle school or high school	1	Married/cohabiting	<20000	Current smoking	Yes	Not overweight	64.7	80.5	No	No
0	0	0	0	0	0	1	childhood exposure	Han	63	male	Middle school or high school	1	Married/cohabiting	<20000	Current smoking	Yes	Not overweight	85	88.5	No	No
0	0	0	0	0	0	1	childhood exposure	Han	62	male	Middle school or high school	1	Married/cohabiting	<20000	Current smoking	Yes	Not overweight	65	82	No	No
0	0	0	0	0	0	1	childhood exposure	Han	62	male	Middle school or high school	1	Married/cohabiting	<20000	Current smoking	Yes	Not overweight	74	87	No	No
0	0	0	0	0	0	1	childhood exposure	Han	62	male	Middle school or high school	1	Married/cohabiting	<20000	Current smoking	Yes	Not overweight	72.5	86	No	No
0	0	0	0	0	0	1	childhood exposure	Han	62	male	Middle school or high school	1	Married/cohabiting	<20000	Current smoking	Yes	Not overweight	74	86	No	No
0	0	0	0	0	0	1	childhood exposure	Han	62	male	Middle school or high school	1	Married/cohabiting	<20000	Current smoking	Yes	Not overweight	72	90	No	No
0	0	0	0	0	0	1	childhood exposure	Han	62	male	Middle school or high school	1	Married/cohabiting	<20000	Current smoking	Yes	Not overweight	72.5	83.5	No	No
0	0	0	0	0	0	1	childhood exposure	Han	61	male	Middle school or high school	1	Married/cohabiting	<20000	Current smoking	Yes	Not overweight	70	83	No	No
1	0	0	0	0	1	1	childhood exposure	Han	61	male	Middle school or high school	1	Married/cohabiting	<20000	Current smoking	Yes	Not overweight	73	83	No	No
0	0	0	0	0	0	1	childhood exposure	Han	61	male	Middle school or high school	1	Married/cohabiting	<20000	Current smoking	Yes	Not overweight	64.5	86	No	No
2	0	2	0	0	4	0	childhood exposure	Han	61	male	Middle school or high school	1	Married/cohabiting	<20000	Current smoking	Yes	Not overweight	72	81	No	No
2	0	0	0	0	2	1	childhood exposure	Han	61	male	Middle school or high school	1	Married/cohabiting	<20000	Current smoking	Yes	Not overweight	79	87.5	No	No
0	0	0	0	0	0	1	childhood exposure	Han	61	male	Middle school or high school	1	Married/cohabiting	<20000	Current smoking	Yes	Not overweight	68	86.5	No	No
0	0	0	0	0	0	1	childhood exposure	Han	61	male	Middle school or high school	1	Married/cohabiting	<20000	Current smoking	Yes	Not overweight	65	80.5	No	No
0	0	0	0	0	0	1	childhood exposure	Han	61	male	Middle school or high school	1	Married/cohabiting	<20000	Current smoking	Yes	Not overweight	81.5	94	No	No
0	0	0	0	0	0	1	childhood exposure	Han	61	male	Middle school or high school	1	Married/cohabiting	<20000	Current smoking	Yes	Not overweight	76	89	No	No
0	0	0	0	0	0	1	childhood exposure	Han	60	male	Middle school or high school	1	Married/cohabiting	<20000	Current smoking	Yes	Not overweight	74	85	No	No
4	1	0	0	0	0	1	fetal exposure	Han	59	male	Middle school or high school	1	Married/cohabiting	<20000	Current smoking	Yes	Not overweight	67	86	No	No
1	0	1	0	0	2	1	fetal exposure	Han	59	male	Middle school or high school	1	Married/cohabiting	<20000	Current smoking	Yes	Not overweight	80	89	No	No
0	0	0	0	0	0	1	fetal exposure	Han	58	male	Middle school or high school	1	Married/cohabiting	<20000	Current smoking	Yes	Not overweight	82	85	No	No
0	0	0	0	0	0	1	fetal exposure	Han	58	male	Middle school or high school	1	Married/cohabiting	<20000	Current smoking	Yes	Not overweight	72	85.5	No	No
1	0	1	0	0	2	1	non-exposed	Han	56	male	Middle school or high school	1	Married/cohabiting	<20000	Current smoking	Yes	Not overweight	74	92	No	No
0	0	0	0	0	0	1	non-exposed	Han	56	male	Middle school or high school	1	Married/cohabiting	<20000	Current smoking	Yes	Not overweight	82	95.5	No	No
0	0	0	0	0	0	1	non-exposed	Han	56	male	Middle school or high school	1	Married/cohabiting	<20000	Current smoking	Yes	Not overweight	85	86	No	No
0	0	0	0	0	0	1	non-exposed	Han	56	male	Middle school or high school	1	Married/cohabiting	<20000	Current smoking	Yes	Not overweight	61.2	79.6	No	No
0	0	0	0	0	0	1	non-exposed	Han	56	male	Middle school or high school	1	Married/cohabiting	<20000	Current smoking	Yes	Not overweight	80.5	88	No	No
1	0	0	0	0	1	1	non-exposed	Han	56	male	Middle school or high school	1	Married/cohabiting	<20000	Current smoking	Yes	Not overweight	82.5	87	No	No
0	0	0	0	0	0	1	non-exposed	Han	56	male	Middle school or high school	1	Married/cohabiting	<20000	Current smoking	Yes	Not overweight	72	90	No	No
4	1	4	1	1	8	0	non-exposed	Han	56	male	Middle school or high school	1	Married/cohabiting	<20000	Current smoking	Yes	Not overweight	68.7	86	No	No
0	0	0	0	0	0	1	non-exposed	Han	56	male	Middle school or high school	1	Married/cohabiting	<20000	Current smoking	Yes	Not overweight	78	89	No	No
0	0	1	0	0	1	1	non-exposed	Han	55	male	Middle school or high school	1	Married/cohabiting	<20000	Current smoking	Yes	Not overweight	66	88.5	No	No
0	0	0	0	0	0	1	non-exposed	Han	55	male	Middle school or high school	1	Married/cohabiting	<20000	Current smoking	Yes	Not overweight	69	85	No	No
1	0	2	0	0	3	0	non-exposed	Han	55	male	Middle school or high school	1	Married/cohabiting	<20000	Current smoking	Yes	Not overweight	65	78.5	No	No
2	0	0	0	0	2	1	non-exposed	Han	55	male	Middle school or high school	1	Married/cohabiting	<20000	Current smoking	Yes	Not overweight	65.2	83.5	No	No
0	0	0	0	0	0	1	non-exposed	Han	54	male	Middle school or high school	1	Married/cohabiting	<20000	Current smoking	Yes	Not overweight	61	80	No	No
0	0	0	0	0	0	1	non-exposed	Han	54	male	Middle school or high school	1	Married/cohabiting	<20000	Current smoking	Yes	Not overweight	77.4	92.5	No	No
0	0	0	0	0	0	1	non-exposed	Han	54	male	Middle school or high school	1	Married/cohabiting	<20000	Current smoking	Yes	Not overweight	71.5	86	No	No
1	0	0	0	0	1	1	non-exposed	Han	54	male	Middle school or high school	1	Married/cohabiting	<20000	Current smoking	Yes	Not overweight	68	87.5	No	No
0	0	0	0	0	0	1	non-exposed	Han	54	male	Middle school or high school	1	Married/cohabiting	<20000	Current smoking	Yes	Not overweight	72	84	No	No
0	0	0	0	0	0	1	non-exposed	Han	54	male	Middle school or high school	1	Married/cohabiting	<20000	Current smoking	Yes	Not overweight	64.5	82.5	No	No
0	0	0	0	0	0	1	non-exposed	Han	53	male	Middle school or high school	1	Married/cohabiting	<20000	Current smoking	Yes	Not overweight	83	93	No	No
1	0	2	0	0	3	0	non-exposed	Han	53	male	Middle school or high school	1	Married/cohabiting	<20000	Current smoking	Yes	Not overweight	83	84	No	No
1	0	0	0	0	1	1	non-exposed	Han	53	male	Middle school or high school	1	Married/cohabiting	<20000	Current smoking	Yes	Not overweight	85	93	No	No
2	0	1	0	0	3	0	non-exposed	Han	53	male	Middle school or high school	1	Married/cohabiting	<20000	Current smoking	Yes	Not overweight	71.5	89	No	No
0	0	1	0	0	1	1	non-exposed	Han	53	male	Middle school or high school	1	Married/cohabiting	<20000	Current smoking	Yes	Not overweight	79	90	No	No
2	0	1	0	0	3	0	non-exposed	Han	52	male	Middle school or high school	1	Married/cohabiting	<20000	Current smoking	Yes	Not overweight	68.5	84.5	No	No
0	0	0	0	0	0	1	non-exposed	Han	52	male	Middle school or high school	1	Married/cohabiting	<20000	Current smoking	Yes	Not overweight	65	83.5	No	No
2	0	2	0	0	4	0	non-exposed	Han	51	male	Middle school or high school	1	Married/cohabiting	<20000	Current smoking	Yes	Not overweight	79	87	No	No
2	0	2	0	0	4	0	non-exposed	Han	51	male	Middle school or high school	1	Married/cohabiting	<20000	Current smoking	Yes	Not overweight	75	79	No	No
0	0	0	0	0	0	1	non-exposed	Han	51	male	Middle school or high school	1	Married/cohabiting	<20000	Current smoking	Yes	Not overweight	74	91	No	No
2	0	1	0	0	3	0	non-exposed	Han	48	male	Middle school or high school	1	Married/cohabiting	<20000	Current smoking	Yes	Not overweight	67	87.5	No	No
1	0	2	0	0	3	0	non-exposed	Han	48	male	Middle school or high school	1	Married/cohabiting	<20000	Current smoking	Yes	Not overweight	67	83	No	No
1	0	0	0	0	1	1	non-exposed	Han	46	male	Middle school or high school	1	Married/cohabiting	<20000	Current smoking	Yes	Not overweight	78	89	No	No
1	0	0	0	0	1	1	non-exposed	Han	45	male	Middle school or high school	1	Married/cohabiting	<20000	Current smoking	Yes	Not overweight	64	81.5	No	No
0	0	0	0	0	0	1	non-exposed	Han	45	male	Middle school or high school	1	Married/cohabiting	<20000	Current smoking	Yes	Not overweight	71.5	86	No	No
2	0	2	0	0	4	0	non-exposed	Han	45	male	Middle school or high school	1	Married/cohabiting	<20000	Current smoking	Yes	Not overweight	69.4	85.2	No	No
1	0	0	0	0	1	1	non-exposed	Han	44	male	Middle school or high school	1	Married/cohabiting	<20000	Current smoking	Yes	Not overweight	75.3	89.9	No	No
0	0	0	0	0	0	1	non-exposed	Han	44	male	Middle school or high school	1	Married/cohabiting	<20000	Current smoking	Yes	Not overweight	64	81	No	No
1	0	1	0	0	2	1	non-exposed	Han	43	male	Middle school or high school	1	Married/cohabiting	<20000	Current smoking	Yes	Not overweight	64	80	No	No
0	0	0	0	0	0	1	non-exposed	Han	42	male	Middle school or high school	1	Married/cohabiting	<20000	Current smoking	Yes	Not overweight	65	87	No	No
1	0	0	0	0	1	1	non-exposed	Han	41	male	Middle school or high school	1	Married/cohabiting	<20000	Current smoking	Yes	Not overweight	70	88	No	No
0	0	0	0	0	0	1	non-exposed	Han	79	male	Primary school and below	1	Married/cohabiting	20000~99999	Current smoking	Yes	Not overweight	75	76	No	No
0	0	0	0	0	0	1	non-exposed	Han	77	male	Primary school and below	1	Married/cohabiting	20000~99999	Current smoking	Yes	Not overweight	72	75	Yes	No
0	0	0	0	0	0	1	adolescent exposure	Han	74	male	Primary school and below	1	Married/cohabiting	20000~99999	Current smoking	Yes	Not overweight	72	83	Yes	No
0	0	0	0	0	0	1	adolescent exposure	Han	73	male	Primary school and below	1	Married/cohabiting	20000~99999	Current smoking	Yes	Not overweight	66	80	No	No
5	1	3	1	1	8	0	adolescent exposure	Han	73	male	Primary school and below	1	Married/cohabiting	20000~99999	Current smoking	Yes	Not overweight	61	80	Yes	No
0	0	2	0	0	2	1	adolescent exposure	Han	73	male	Primary school and below	1	Married/cohabiting	20000~99999	Current smoking	Yes	Not overweight	75	90	Yes	No
2	0	2	0	0	4	0	adolescent exposure	Han	72	male	Primary school and below	1	Married/cohabiting	20000~99999	Current smoking	Yes	Not overweight	64	77.5	No	No
1	0	0	0	0	1	1	childhood exposure	Han	69	male	Primary school and below	1	Married/cohabiting	20000~99999	Current smoking	Yes	Not overweight	72	92	No	No
0	0	0	0	0	0	1	childhood exposure	Han	68	male	Primary school and below	1	Married/cohabiting	20000~99999	Current smoking	Yes	Not overweight	74.5	86	No	No
0	0	0	0	0	0	1	childhood exposure	Han	67	male	Primary school and below	1	Married/cohabiting	20000~99999	Current smoking	Yes	Not overweight	64	78	No	No
1	0	0	0	0	1	1	childhood exposure	Han	67	male	Primary school and below	1	Married/cohabiting	20000~99999	Current smoking	Yes	Not overweight	74	88	No	No
0	0	0	0	0	0	1	childhood exposure	Han	65	male	Primary school and below	1	Married/cohabiting	20000~99999	Current smoking	Yes	Not overweight	65	80.2	No	No
0	0	0	0	0	0	1	childhood exposure	Han	65	male	Primary school and below	1	Married/cohabiting	20000~99999	Current smoking	Yes	Not overweight	90.1	97.7	No	No
0	0	0	0	0	0	1	childhood exposure	Han	65	male	Primary school and below	1	Married/cohabiting	20000~99999	Current smoking	Yes	Not overweight	74	85	No	No
2	0	1	0	0	3	0	childhood exposure	Han	65	male	Primary school and below	1	Married/cohabiting	20000~99999	Current smoking	Yes	Not overweight	67	85.2	No	No
0	0	1	0	0	1	1	childhood exposure	Han	65	male	Primary school and below	1	Married/cohabiting	20000~99999	Current smoking	Yes	Not overweight	71	85.5	No	No
0	0	0	0	0	0	1	childhood exposure	Han	65	male	Primary school and below	1	Married/cohabiting	20000~99999	Current smoking	Yes	Not overweight	78	94	No	No
2	0	1	0	0	3	0	childhood exposure	Han	65	male	Primary school and below	1	Married/cohabiting	20000~99999	Current smoking	Yes	Not overweight	70	83.5	No	No
0	0	0	0	0	0	1	childhood exposure	Han	64	male	Primary school and below	1	Married/cohabiting	20000~99999	Current smoking	Yes	Not overweight	73	88	No	No
0	0	0	0	0	0	1	childhood exposure	Han	64	male	Primary school and below	1	Married/cohabiting	20000~99999	Current smoking	Yes	Not overweight	74	80.5	No	No
0	0	0	0	0	0	1	childhood exposure	Han	64	male	Primary school and below	1	Married/cohabiting	20000~99999	Current smoking	Yes	Not overweight	70	83.9	No	No
2	0	0	0	0	2	1	childhood exposure	Han	64	male	Primary school and below	1	Married/cohabiting	20000~99999	Current smoking	Yes	Not overweight	75	89	No	No
0	0	0	0	0	0	1	childhood exposure	Han	64	male	Primary school and below	1	Married/cohabiting	20000~99999	Current smoking	Yes	Not overweight	79	90.5	Yes	No
0	0	0	0	0	0	1	childhood exposure	Han	63	male	Primary school and below	1	Married/cohabiting	20000~99999	Current smoking	Yes	Not overweight	67	83	No	No
0	0	0	0	0	0	1	childhood exposure	Han	63	male	Primary school and below	1	Married/cohabiting	20000~99999	Current smoking	Yes	Not overweight	74	89.8	No	No
0	0	0	0	0	0	1	childhood exposure	Han	63	male	Primary school and below	1	Married/cohabiting	20000~99999	Current smoking	Yes	Not overweight	68.9	87.8	No	No
0	0	1	0	0	1	1	childhood exposure	Han	62	male	Primary school and below	1	Married/cohabiting	20000~99999	Current smoking	Yes	Not overweight	71	84	No	No
0	0	0	0	0	0	1	childhood exposure	Han	62	male	Primary school and below	1	Married/cohabiting	20000~99999	Current smoking	Yes	Not overweight	80	86	No	No
1	0	0	0	0	1	1	childhood exposure	Han	62	male	Primary school and below	1	Married/cohabiting	20000~99999	Current smoking	Yes	Not overweight	68	76	No	No
1	0	0	0	0	1	1	childhood exposure	Han	62	male	Primary school and below	1	Married/cohabiting	20000~99999	Current smoking	Yes	Not overweight	72.3	87.4	No	No
0	0	0	0	0	0	1	childhood exposure	Han	62	male	Primary school and below	1	Married/cohabiting	20000~99999	Current smoking	Yes	Not overweight	80	95	No	No
0	0	0	0	0	0	1	childhood exposure	Han	62	male	Primary school and below	1	Married/cohabiting	20000~99999	Current smoking	Yes	Not overweight	76.5	86.4	Yes	No
0	0	0	0	0	0	1	childhood exposure	Han	62	male	Primary school and below	1	Married/cohabiting	20000~99999	Current smoking	Yes	Not overweight	82.5	90	No	No
0	0	0	0	0	0	1	childhood exposure	Han	62	male	Primary school and below	1	Married/cohabiting	20000~99999	Current smoking	Yes	Not overweight	70	85	No	No
0	0	0	0	0	0	1	childhood exposure	Han	61	male	Primary school and below	1	Married/cohabiting	20000~99999	Current smoking	Yes	Not overweight	76	83	No	No
1	0	2	0	0	3	0	childhood exposure	Han	61	male	Primary school and below	1	Married/cohabiting	20000~99999	Current smoking	Yes	Not overweight	71	86	No	No
2	0	2	0	0	4	0	childhood exposure	Han	60	male	Primary school and below	1	Married/cohabiting	20000~99999	Current smoking	Yes	Not overweight	76	89	No	No
2	0	1	0	0	3	0	fetal exposure	Han	59	male	Primary school and below	1	Married/cohabiting	20000~99999	Current smoking	Yes	Not overweight	78	90	No	No
0	0	0	0	0	0	1	fetal exposure	Han	59	male	Primary school and below	1	Married/cohabiting	20000~99999	Current smoking	Yes	Not overweight	76.5	85	No	No
0	0	0	0	0	0	1	fetal exposure	Han	59	male	Primary school and below	1	Married/cohabiting	20000~99999	Current smoking	Yes	Not overweight	77	87	No	No
2	0	1	0	0	1	1	fetal exposure	Han	59	male	Primary school and below	1	Married/cohabiting	20000~99999	Current smoking	Yes	Not overweight	81	88	No	No
0	0	0	0	0	0	1	fetal exposure	Han	59	male	Primary school and below	1	Married/cohabiting	20000~99999	Current smoking	Yes	Not overweight	70	82	No	No
0	0	0	0	0	0	1	fetal exposure	Han	59	male	Primary school and below	1	Married/cohabiting	20000~99999	Current smoking	Yes	Not overweight	66.5	84.5	No	No
4	1	3	1	1	2	1	fetal exposure	Han	58	male	Primary school and below	1	Married/cohabiting	20000~99999	Current smoking	Yes	Not overweight	68	78	No	No
0	0	1	0	0	1	1	fetal exposure	Han	57	male	Primary school and below	1	Married/cohabiting	20000~99999	Current smoking	Yes	Not overweight	71	80.5	Yes	No
1	0	1	0	0	2	1	non-exposed	Han	56	male	Primary school and below	1	Married/cohabiting	20000~99999	Current smoking	Yes	Not overweight	64	81.5	No	No
0	0	0	0	0	0	1	non-exposed	Han	56	male	Primary school and below	1	Married/cohabiting	20000~99999	Current smoking	Yes	Not overweight	84.4	94.5	No	No
2	0	2	0	0	4	0	non-exposed	Han	56	male	Primary school and below	1	Married/cohabiting	20000~99999	Current smoking	Yes	Not overweight	70	87	Yes	No
0	0	2	0	0	2	1	non-exposed	Han	56	male	Primary school and below	1	Married/cohabiting	20000~99999	Current smoking	Yes	Not overweight	68	84.8	No	No
0	0	0	0	0	0	1	non-exposed	Han	56	male	Primary school and below	1	Married/cohabiting	20000~99999	Current smoking	Yes	Not overweight	75	85	No	No
0	0	0	0	0	0	1	non-exposed	Han	55	male	Primary school and below	1	Married/cohabiting	20000~99999	Current smoking	Yes	Not overweight	80	87	No	No
4	1	4	1	1	8	0	non-exposed	Han	55	male	Primary school and below	1	Married/cohabiting	20000~99999	Current smoking	Yes	Not overweight	61	79	No	No
2	0	2	0	0	4	0	non-exposed	Han	55	male	Primary school and below	1	Married/cohabiting	20000~99999	Current smoking	Yes	Not overweight	72	90	No	No
2	0	2	0	0	4	0	non-exposed	Han	55	male	Primary school and below	1	Married/cohabiting	20000~99999	Current smoking	Yes	Not overweight	74	82	No	No
0	0	0	0	0	0	1	non-exposed	Han	55	male	Primary school and below	1	Married/cohabiting	20000~99999	Current smoking	Yes	Not overweight	76	87	No	No
0	0	0	0	0	0	1	non-exposed	Han	55	male	Primary school and below	1	Married/cohabiting	20000~99999	Current smoking	Yes	Not overweight	76	87	No	No
4	1	4	1	1	8	0	non-exposed	Han	55	male	Primary school and below	1	Married/cohabiting	20000~99999	Current smoking	Yes	Not overweight	67	84.2	No	No
0	0	0	0	0	0	1	non-exposed	Han	55	male	Primary school and below	1	Married/cohabiting	20000~99999	Current smoking	Yes	Not overweight	73	87.5	No	No
1	0	1	0	0	2	1	non-exposed	Han	55	male	Primary school and below	1	Married/cohabiting	20000~99999	Current smoking	Yes	Not overweight	75	88	No	No
2	0	0	0	0	2	1	non-exposed	Han	54	male	Primary school and below	1	Married/cohabiting	20000~99999	Current smoking	Yes	Not overweight	65	78	No	No
0	0	0	0	0	0	1	non-exposed	Han	54	male	Primary school and below	1	Married/cohabiting	20000~99999	Current smoking	Yes	Not overweight	63	81.2	No	No
0	0	0	0	0	0	1	non-exposed	Han	54	male	Primary school and below	1	Married/cohabiting	20000~99999	Current smoking	Yes	Not overweight	82	91	No	No
1	0	0	0	0	1	1	non-exposed	Han	54	male	Primary school and below	1	Married/cohabiting	20000~99999	Current smoking	Yes	Not overweight	69	85	No	No
0	0	0	0	0	0	1	non-exposed	Han	54	male	Primary school and below	1	Married/cohabiting	20000~99999	Current smoking	Yes	Not overweight	74.5	84	No	No
0	0	0	0	0	0	1	non-exposed	Han	54	male	Primary school and below	1	Married/cohabiting	20000~99999	Current smoking	Yes	Not overweight	68	80	No	No
2	0	0	0	0	2	1	non-exposed	Han	53	male	Primary school and below	1	Married/cohabiting	20000~99999	Current smoking	Yes	Not overweight	69	85.5	No	No
2	0	0	0	0	2	1	non-exposed	Han	53	male	Primary school and below	1	Married/cohabiting	20000~99999	Current smoking	Yes	Not overweight	75	83.5	No	No
1	0	0	0	0	1	1	non-exposed	Han	53	male	Primary school and below	1	Married/cohabiting	20000~99999	Current smoking	Yes	Not overweight	74	85	No	No
0	0	0	0	0	0	1	non-exposed	Han	53	male	Primary school and below	1	Married/cohabiting	20000~99999	Current smoking	Yes	Not overweight	72	87	No	No
0	0	0	0	0	0	1	non-exposed	Han	53	male	Primary school and below	1	Married/cohabiting	20000~99999	Current smoking	Yes	Not overweight	74	79.5	No	No
0	0	0	0	0	0	1	non-exposed	Han	53	male	Primary school and below	1	Married/cohabiting	20000~99999	Current smoking	Yes	Not overweight	73	82	No	No
0	0	0	0	0	0	1	non-exposed	Han	52	male	Primary school and below	1	Married/cohabiting	20000~99999	Current smoking	Yes	Not overweight	73	84	No	No
0	0	0	0	0	0	1	non-exposed	Han	52	male	Primary school and below	1	Married/cohabiting	20000~99999	Current smoking	Yes	Not overweight	72	81.5	No	No
1	0	1	0	0	2	1	non-exposed	Han	52	male	Primary school and below	1	Married/cohabiting	20000~99999	Current smoking	Yes	Not overweight	73	82	No	No
1	0	0	0	0	1	1	non-exposed	Han	52	male	Primary school and below	1	Married/cohabiting	20000~99999	Current smoking	Yes	Not overweight	71.5	88.2	No	No
0	0	0	0	0	0	1	non-exposed	Han	52	male	Primary school and below	1	Married/cohabiting	20000~99999	Current smoking	Yes	Not overweight	70	86	No	No
4	1	3	1	1	7	0	non-exposed	Han	52	male	Primary school and below	1	Married/cohabiting	20000~99999	Current smoking	Yes	Not overweight	75	94.5	No	No
0	0	0	0	0	0	1	non-exposed	Han	52	male	Primary school and below	1	Married/cohabiting	20000~99999	Current smoking	Yes	Not overweight	63.2	79	No	No
0	0	0	0	0	0	1	non-exposed	Han	52	male	Primary school and below	1	Married/cohabiting	20000~99999	Current smoking	Yes	Not overweight	73	79	No	No
0	0	0	0	0	0	1	non-exposed	Han	52	male	Primary school and below	1	Married/cohabiting	20000~99999	Current smoking	Yes	Not overweight	79	81.5	No	No
2	0	1	0	0	3	0	non-exposed	Han	51	male	Primary school and below	1	Married/cohabiting	20000~99999	Current smoking	Yes	Not overweight	71	85	No	No
0	0	0	0	0	0	1	non-exposed	Han	51	male	Primary school and below	1	Married/cohabiting	20000~99999	Current smoking	Yes	Not overweight	74	87	No	No
0	0	0	0	0	0	1	non-exposed	Han	51	male	Primary school and below	1	Married/cohabiting	20000~99999	Current smoking	Yes	Not overweight	65	83	No	No
0	0	0	0	0	0	1	non-exposed	Han	51	male	Primary school and below	1	Married/cohabiting	20000~99999	Current smoking	Yes	Not overweight	68.7	83.8	No	No
1	0	0	0	0	1	1	non-exposed	Han	51	male	Primary school and below	1	Married/cohabiting	20000~99999	Current smoking	Yes	Not overweight	72	86	No	No
1	0	0	0	0	1	1	non-exposed	Han	51	male	Primary school and below	1	Married/cohabiting	20000~99999	Current smoking	Yes	Not overweight	70	86	No	No
0	0	0	0	0	0	1	non-exposed	Han	51	male	Primary school and below	1	Married/cohabiting	20000~99999	Current smoking	Yes	Not overweight	68	82	No	No
0	0	0	0	0	0	1	non-exposed	Han	51	male	Primary school and below	1	Married/cohabiting	20000~99999	Current smoking	Yes	Not overweight	72	87	No	No
0	0	2	0	0	2	1	non-exposed	Han	51	male	Primary school and below	1	Married/cohabiting	20000~99999	Current smoking	Yes	Not overweight	76	93	No	No
1	0	1	0	0	2	1	non-exposed	Han	50	male	Primary school and below	1	Married/cohabiting	20000~99999	Current smoking	Yes	Not overweight	74.5	93	No	No
2	0	0	0	0	2	1	non-exposed	Han	50	male	Primary school and below	1	Married/cohabiting	20000~99999	Current smoking	Yes	Not overweight	72	91	No	No
0	0	0	0	0	0	1	non-exposed	Han	50	male	Primary school and below	1	Married/cohabiting	20000~99999	Current smoking	Yes	Not overweight	87.5	89.5	No	No
0	0	0	0	0	0	1	non-exposed	Han	50	male	Primary school and below	1	Married/cohabiting	20000~99999	Current smoking	Yes	Not overweight	70	87.2	No	No
1	0	1	0	0	2	1	non-exposed	Han	50	male	Primary school and below	1	Married/cohabiting	20000~99999	Current smoking	Yes	Not overweight	74	90	No	No
0	0	0	0	0	0	1	non-exposed	Han	50	male	Primary school and below	1	Married/cohabiting	20000~99999	Current smoking	Yes	Not overweight	71	85.5	No	No
1	0	1	0	0	2	1	non-exposed	Han	50	male	Primary school and below	1	Married/cohabiting	20000~99999	Current smoking	Yes	Not overweight	63	79	No	No
2	0	2	0	0	4	0	non-exposed	Han	50	male	Primary school and below	1	Married/cohabiting	20000~99999	Current smoking	Yes	Not overweight	70	85.2	No	No
0	0	0	0	0	0	1	non-exposed	Han	49	male	Primary school and below	1	Married/cohabiting	20000~99999	Current smoking	Yes	Not overweight	74	90.2	No	No
0	0	0	0	0	0	1	non-exposed	Han	49	male	Primary school and below	1	Married/cohabiting	20000~99999	Current smoking	Yes	Not overweight	84	89	No	No
0	0	0	0	0	0	1	non-exposed	Han	49	male	Primary school and below	1	Married/cohabiting	20000~99999	Current smoking	Yes	Not overweight	66	85	No	No
1	0	0	0	0	1	1	non-exposed	Han	49	male	Primary school and below	1	Married/cohabiting	20000~99999	Current smoking	Yes	Not overweight	68.5	84	No	No
0	0	0	0	0	0	1	non-exposed	Han	49	male	Primary school and below	1	Married/cohabiting	20000~99999	Current smoking	Yes	Not overweight	73	92	No	No
0	0	0	0	0	0	1	non-exposed	Han	49	male	Primary school and below	1	Married/cohabiting	20000~99999	Current smoking	Yes	Not overweight	66	84	No	No
0	0	0	0	0	0	1	non-exposed	Han	48	male	Primary school and below	1	Married/cohabiting	20000~99999	Current smoking	Yes	Not overweight	72	87	No	No
2	0	1	0	0	3	0	non-exposed	Han	48	male	Primary school and below	1	Married/cohabiting	20000~99999	Current smoking	Yes	Not overweight	66	85	No	No
2	0	2	0	0	4	0	non-exposed	Han	48	male	Primary school and below	1	Married/cohabiting	20000~99999	Current smoking	Yes	Not overweight	82	99	No	No
0	0	0	0	0	0	1	non-exposed	Han	48	male	Primary school and below	1	Married/cohabiting	20000~99999	Current smoking	Yes	Not overweight	72	88	No	No
1	0	0	0	0	1	1	non-exposed	Han	48	male	Primary school and below	1	Married/cohabiting	20000~99999	Current smoking	Yes	Not overweight	75	87.5	No	No
0	0	0	0	0	0	1	non-exposed	Han	48	male	Primary school and below	1	Married/cohabiting	20000~99999	Current smoking	Yes	Not overweight	70	92	No	No
0	0	0	0	0	0	1	non-exposed	Han	48	male	Primary school and below	1	Married/cohabiting	20000~99999	Current smoking	Yes	Not overweight	65	74	No	No
0	0	0	0	0	0	1	non-exposed	Han	48	male	Primary school and below	1	Married/cohabiting	20000~99999	Current smoking	Yes	Not overweight	68.5	84	No	No
0	0	0	0	0	0	1	non-exposed	Han	48	male	Primary school and below	1	Married/cohabiting	20000~99999	Current smoking	Yes	Not overweight	67	84	No	No
0	0	0	0	0	0	1	non-exposed	Han	48	male	Primary school and below	1	Married/cohabiting	20000~99999	Current smoking	Yes	Not overweight	74	81	No	No
0	0	0	0	0	0	1	non-exposed	Han	48	male	Primary school and below	1	Married/cohabiting	20000~99999	Current smoking	Yes	Not overweight	81.5	93	No	No
0	0	1	0	0	1	1	non-exposed	Han	47	male	Primary school and below	1	Married/cohabiting	20000~99999	Current smoking	Yes	Not overweight	69	85.5	No	No
1	0	0	0	0	1	1	non-exposed	Han	47	male	Primary school and below	1	Married/cohabiting	20000~99999	Current smoking	Yes	Not overweight	72	84	No	No
2	0	1	0	0	3	0	non-exposed	Han	47	male	Primary school and below	1	Married/cohabiting	20000~99999	Current smoking	Yes	Not overweight	69	85	No	No
0	0	0	0	0	0	1	non-exposed	Han	47	male	Primary school and below	1	Married/cohabiting	20000~99999	Current smoking	Yes	Not overweight	69	86	No	No
0	0	0	0	0	0	1	non-exposed	Han	47	male	Primary school and below	1	Married/cohabiting	20000~99999	Current smoking	Yes	Not overweight	73	90.5	No	No
0	0	0	0	0	0	1	non-exposed	Han	47	male	Primary school and below	1	Married/cohabiting	20000~99999	Current smoking	Yes	Not overweight	68	85	No	No
6	1	6	1	1	12	0	non-exposed	Han	47	male	Primary school and below	1	Married/cohabiting	20000~99999	Current smoking	Yes	Not overweight	71	81	No	No
0	0	1	0	0	1	1	non-exposed	Han	47	male	Primary school and below	1	Married/cohabiting	20000~99999	Current smoking	Yes	Not overweight	73	84.5	No	No
0	0	2	0	0	2	1	non-exposed	Han	47	male	Primary school and below	1	Married/cohabiting	20000~99999	Current smoking	Yes	Not overweight	66	87	No	No
0	0	0	0	0	0	1	non-exposed	Han	47	male	Primary school and below	1	Married/cohabiting	20000~99999	Current smoking	Yes	Not overweight	78	91	No	No
1	0	0	0	0	1	1	non-exposed	Han	46	male	Primary school and below	1	Married/cohabiting	20000~99999	Current smoking	Yes	Not overweight	86.5	90.5	No	No
1	0	1	0	0	2	1	non-exposed	Han	46	male	Primary school and below	1	Married/cohabiting	20000~99999	Current smoking	Yes	Not overweight	84.5	92.1	No	No
0	0	0	0	0	0	1	non-exposed	Han	46	male	Primary school and below	1	Married/cohabiting	20000~99999	Current smoking	Yes	Not overweight	72	85	No	No
2	0	1	0	0	3	0	non-exposed	Han	46	male	Primary school and below	1	Married/cohabiting	20000~99999	Current smoking	Yes	Not overweight	74	88	No	No
2	0	2	0	0	4	0	non-exposed	Han	46	male	Primary school and below	1	Married/cohabiting	20000~99999	Current smoking	Yes	Not overweight	72	83	No	No
2	0	1	0	0	3	0	non-exposed	Han	46	male	Primary school and below	1	Married/cohabiting	20000~99999	Current smoking	Yes	Not overweight	73	95	No	No
1	0	1	0	0	2	1	non-exposed	Han	46	male	Primary school and below	1	Married/cohabiting	20000~99999	Current smoking	Yes	Not overweight	68	81.5	No	No
1	0	1	0	0	2	1	non-exposed	Han	46	male	Primary school and below	1	Married/cohabiting	20000~99999	Current smoking	Yes	Not overweight	66	84	No	No
1	0	0	0	0	1	1	non-exposed	Han	45	male	Primary school and below	1	Married/cohabiting	20000~99999	Current smoking	Yes	Not overweight	74	92.3	No	No
0	0	2	0	0	2	1	non-exposed	Han	45	male	Primary school and below	1	Married/cohabiting	20000~99999	Current smoking	Yes	Not overweight	66	79	No	No
0	0	1	0	0	1	1	non-exposed	Han	45	male	Primary school and below	1	Married/cohabiting	20000~99999	Current smoking	Yes	Not overweight	65.7	87.5	No	No
0	0	0	0	0	0	1	non-exposed	Han	45	male	Primary school and below	1	Married/cohabiting	20000~99999	Current smoking	Yes	Not overweight	77.5	90	No	No
0	0	0	0	0	0	1	non-exposed	Han	45	male	Primary school and below	1	Married/cohabiting	20000~99999	Current smoking	Yes	Not overweight	71	86	No	No
0	0	0	0	0	0	1	non-exposed	Han	44	male	Primary school and below	1	Married/cohabiting	20000~99999	Current smoking	Yes	Not overweight	85	96.5	No	No
0	0	0	0	0	0	1	non-exposed	Han	44	male	Primary school and below	1	Married/cohabiting	20000~99999	Current smoking	Yes	Not overweight	70	84	No	No
1	0	2	0	0	3	0	non-exposed	Han	44	male	Primary school and below	1	Married/cohabiting	20000~99999	Current smoking	Yes	Not overweight	73.5	85.5	No	No
1	0	1	0	0	2	1	non-exposed	Han	44	male	Primary school and below	1	Married/cohabiting	20000~99999	Current smoking	Yes	Not overweight	72	86	No	No
0	0	0	0	0	0	1	non-exposed	Han	44	male	Primary school and below	1	Married/cohabiting	20000~99999	Current smoking	Yes	Not overweight	85	99.5	No	No
0	0	0	0	0	0	1	non-exposed	Han	43	male	Primary school and below	1	Married/cohabiting	20000~99999	Current smoking	Yes	Not overweight	72	87	No	No
0	0	1	0	0	1	1	non-exposed	Han	43	male	Primary school and below	1	Married/cohabiting	20000~99999	Current smoking	Yes	Not overweight	70	87	No	No
0	0	0	0	0	0	1	non-exposed	Han	43	male	Primary school and below	1	Married/cohabiting	20000~99999	Current smoking	Yes	Not overweight	64	85	No	No
2	0	2	0	0	4	0	non-exposed	Han	42	male	Primary school and below	1	Married/cohabiting	20000~99999	Current smoking	Yes	Not overweight	71	82	No	No
0	0	0	0	0	0	1	non-exposed	Han	42	male	Primary school and below	1	Married/cohabiting	20000~99999	Current smoking	Yes	Not overweight	78	90	No	No
0	0	0	0	0	0	1	non-exposed	Han	42	male	Primary school and below	1	Married/cohabiting	20000~99999	Current smoking	Yes	Not overweight	67	81.2	No	No
6	1	6	1	1	12	0	non-exposed	Han	41	male	Primary school and below	1	Married/cohabiting	20000~99999	Current smoking	Yes	Not overweight	84	93.5	No	No
1	0	2	0	0	3	0	adolescent exposure	Han	75	male	Middle school or high school	1	Married/cohabiting	20000~99999	Current smoking	Yes	Not overweight	68	85	No	No
0	0	0	0	0	0	1	childhood exposure	Han	69	male	Middle school or high school	1	Married/cohabiting	20000~99999	Current smoking	Yes	Not overweight	68	84	No	No
0	0	1	0	0	1	1	childhood exposure	Han	66	male	Middle school or high school	1	Married/cohabiting	20000~99999	Current smoking	Yes	Not overweight	74	84	No	No
1	0	0	0	0	1	1	childhood exposure	Han	66	male	Middle school or high school	1	Married/cohabiting	20000~99999	Current smoking	Yes	Not overweight	67	79	No	No
0	0	0	0	0	0	1	childhood exposure	Han	65	male	Middle school or high school	1	Married/cohabiting	20000~99999	Current smoking	Yes	Not overweight	73.4	86	No	No
0	0	0	0	0	0	1	childhood exposure	Han	65	male	Middle school or high school	1	Married/cohabiting	20000~99999	Current smoking	Yes	Not overweight	75	90	No	No
2	0	0	0	0	2	1	childhood exposure	Han	65	male	Middle school or high school	1	Married/cohabiting	20000~99999	Current smoking	Yes	Not overweight	71	85	No	No
0	0	0	0	0	0	1	childhood exposure	Han	65	male	Middle school or high school	1	Married/cohabiting	20000~99999	Current smoking	Yes	Not overweight	73.5	86.8	Yes	No
1	0	0	0	0	1	1	childhood exposure	Han	65	male	Middle school or high school	1	Married/cohabiting	20000~99999	Current smoking	Yes	Not overweight	71	85	No	No
0	0	1	0	0	1	1	childhood exposure	Han	65	male	Middle school or high school	1	Married/cohabiting	20000~99999	Current smoking	Yes	Not overweight	66.3	76.7	No	No
2	0	2	0	0	4	0	childhood exposure	Han	64	male	Middle school or high school	1	Married/cohabiting	20000~99999	Current smoking	Yes	Not overweight	73.3	87.3	Yes	No
0	0	0	0	0	0	1	childhood exposure	Han	63	male	Middle school or high school	1	Married/cohabiting	20000~99999	Current smoking	Yes	Not overweight	82.5	85.5	No	No
0	0	0	0	0	0	1	childhood exposure	Han	63	male	Middle school or high school	1	Married/cohabiting	20000~99999	Current smoking	Yes	Not overweight	67	79	No	No
0	0	1	0	0	1	1	childhood exposure	Han	62	male	Middle school or high school	1	Married/cohabiting	20000~99999	Current smoking	Yes	Not overweight	73	85	No	No
0	0	0	0	0	0	1	childhood exposure	Han	62	male	Middle school or high school	1	Married/cohabiting	20000~99999	Current smoking	Yes	Not overweight	66	82	No	No
0	0	0	0	0	0	1	childhood exposure	Han	62	male	Middle school or high school	1	Married/cohabiting	20000~99999	Current smoking	Yes	Not overweight	74	90	No	No
0	0	0	0	0	0	1	childhood exposure	Han	62	male	Middle school or high school	1	Married/cohabiting	20000~99999	Current smoking	Yes	Not overweight	71	84	No	No
1	0	0	0	0	1	1	childhood exposure	Han	61	male	Middle school or high school	1	Married/cohabiting	20000~99999	Current smoking	Yes	Not overweight	62.5	81	No	No
0	0	0	0	0	0	1	childhood exposure	Han	61	male	Middle school or high school	1	Married/cohabiting	20000~99999	Current smoking	Yes	Not overweight	71	84	No	No
0	0	0	0	0	0	1	childhood exposure	Han	61	male	Middle school or high school	1	Married/cohabiting	20000~99999	Current smoking	Yes	Not overweight	69.8	85.5	No	No
0	0	1	0	0	1	1	fetal exposure	Han	59	male	Middle school or high school	1	Married/cohabiting	20000~99999	Current smoking	Yes	Not overweight	65	79	No	No
0	0	0	0	0	0	1	fetal exposure	Han	59	male	Middle school or high school	1	Married/cohabiting	20000~99999	Current smoking	Yes	Not overweight	73	85	No	No
0	0	0	0	0	0	1	fetal exposure	Han	59	male	Middle school or high school	1	Married/cohabiting	20000~99999	Current smoking	Yes	Not overweight	74.3	86.8	No	No
0	0	1	0	0	1	1	fetal exposure	Han	59	male	Middle school or high school	1	Married/cohabiting	20000~99999	Current smoking	Yes	Not overweight	81.5	87.2	Yes	No
0	0	0	0	0	0	1	fetal exposure	Han	59	male	Middle school or high school	1	Married/cohabiting	20000~99999	Current smoking	Yes	Not overweight	69.5	84	No	No
0	0	0	0	0	0	1	fetal exposure	Han	58	male	Middle school or high school	1	Married/cohabiting	20000~99999	Current smoking	Yes	Not overweight	70	87	No	No
0	0	0	0	0	0	1	non-exposed	Han	56	male	Middle school or high school	1	Married/cohabiting	20000~99999	Current smoking	Yes	Not overweight	69	82.5	No	No
0	0	0	0	0	0	1	non-exposed	Han	56	male	Middle school or high school	1	Married/cohabiting	20000~99999	Current smoking	Yes	Not overweight	73	88.6	No	No
1	0	0	0	0	1	1	non-exposed	Han	56	male	Middle school or high school	1	Married/cohabiting	20000~99999	Current smoking	Yes	Not overweight	68	87	No	No
2	0	2	0	0	4	0	non-exposed	Han	56	male	Middle school or high school	1	Married/cohabiting	20000~99999	Current smoking	Yes	Not overweight	78	92	No	No
1	0	0	0	0	1	1	non-exposed	Han	56	male	Middle school or high school	1	Married/cohabiting	20000~99999	Current smoking	Yes	Not overweight	76	89	No	No
0	0	0	0	0	0	1	non-exposed	Han	56	male	Middle school or high school	1	Married/cohabiting	20000~99999	Current smoking	Yes	Not overweight	75.5	85	No	No
0	0	0	0	0	0	1	non-exposed	Han	56	male	Middle school or high school	1	Married/cohabiting	20000~99999	Current smoking	Yes	Not overweight	62	83	No	No
0	0	0	0	0	0	1	non-exposed	Han	56	male	Middle school or high school	1	Married/cohabiting	20000~99999	Current smoking	Yes	Not overweight	77	93	No	No
0	0	0	0	0	0	1	non-exposed	Han	56	male	Middle school or high school	1	Married/cohabiting	20000~99999	Current smoking	Yes	Not overweight	76	86	No	No
2	0	2	0	0	4	0	non-exposed	Han	56	male	Middle school or high school	1	Married/cohabiting	20000~99999	Current smoking	Yes	Not overweight	68	84	No	No
0	0	0	0	0	0	1	non-exposed	Han	56	male	Middle school or high school	1	Married/cohabiting	20000~99999	Current smoking	Yes	Not overweight	87.7	93.5	No	No
0	0	0	0	0	0	1	non-exposed	Han	56	male	Middle school or high school	1	Married/cohabiting	20000~99999	Current smoking	Yes	Not overweight	64	86	No	No
0	0	0	0	0	0	1	non-exposed	Han	56	male	Middle school or high school	1	Married/cohabiting	20000~99999	Current smoking	Yes	Not overweight	82	86.5	No	No
0	0	1	0	0	1	1	non-exposed	Han	55	male	Middle school or high school	1	Married/cohabiting	20000~99999	Current smoking	Yes	Not overweight	82	87.5	No	No
0	0	0	0	0	0	1	non-exposed	Han	55	male	Middle school or high school	1	Married/cohabiting	20000~99999	Current smoking	Yes	Not overweight	73	81	No	No
0	0	0	0	0	0	1	non-exposed	Han	55	male	Middle school or high school	1	Married/cohabiting	20000~99999	Current smoking	Yes	Not overweight	68	82	No	No
0	0	0	0	0	0	1	non-exposed	Han	54	male	Middle school or high school	1	Married/cohabiting	20000~99999	Current smoking	Yes	Not overweight	84	93	No	No
0	0	0	0	0	0	1	non-exposed	Han	54	male	Middle school or high school	1	Married/cohabiting	20000~99999	Current smoking	Yes	Not overweight	76	90.5	No	No
1	0	0	0	0	1	1	non-exposed	Han	54	male	Middle school or high school	1	Married/cohabiting	20000~99999	Current smoking	Yes	Not overweight	72	83	No	No
0	0	0	0	0	0	1	non-exposed	Han	54	male	Middle school or high school	1	Married/cohabiting	20000~99999	Current smoking	Yes	Not overweight	70	89	No	No
2	0	2	0	0	4	0	non-exposed	Han	54	male	Middle school or high school	1	Married/cohabiting	20000~99999	Current smoking	Yes	Not overweight	79	91	No	No
2	0	0	0	0	2	1	non-exposed	Han	54	male	Middle school or high school	1	Married/cohabiting	20000~99999	Current smoking	Yes	Not overweight	83	90.1	No	No
0	0	0	0	0	0	1	non-exposed	Han	54	male	Middle school or high school	1	Married/cohabiting	20000~99999	Current smoking	Yes	Not overweight	85.1	93	No	No
0	0	0	0	0	0	1	non-exposed	Han	53	male	Middle school or high school	1	Married/cohabiting	20000~99999	Current smoking	Yes	Not overweight	72	87	No	No
3	1	3	1	1	6	0	non-exposed	Han	53	male	Middle school or high school	1	Married/cohabiting	20000~99999	Current smoking	Yes	Not overweight	67.4	85	No	No
0	0	0	0	0	0	1	non-exposed	Han	53	male	Middle school or high school	1	Married/cohabiting	20000~99999	Current smoking	Yes	Not overweight	83.1	85	No	No
0	0	0	0	0	0	1	non-exposed	Han	53	male	Middle school or high school	1	Married/cohabiting	20000~99999	Current smoking	Yes	Not overweight	75	85	No	No
0	0	2	0	0	2	1	non-exposed	Han	53	male	Middle school or high school	1	Married/cohabiting	20000~99999	Current smoking	Yes	Not overweight	79.8	80	No	No
0	0	0	0	0	0	1	non-exposed	Han	53	male	Middle school or high school	1	Married/cohabiting	20000~99999	Current smoking	Yes	Not overweight	82	85	No	No
0	0	0	0	0	0	1	non-exposed	Han	53	male	Middle school or high school	1	Married/cohabiting	20000~99999	Current smoking	Yes	Not overweight	74	84	No	No
2	0	1	0	0	3	0	non-exposed	Han	52	male	Middle school or high school	1	Married/cohabiting	20000~99999	Current smoking	Yes	Not overweight	68.5	86.5	No	No
0	0	0	0	0	0	1	non-exposed	Han	52	male	Middle school or high school	1	Married/cohabiting	20000~99999	Current smoking	Yes	Not overweight	69	81	No	No
0	0	0	0	0	0	1	non-exposed	Han	52	male	Middle school or high school	1	Married/cohabiting	20000~99999	Current smoking	Yes	Not overweight	78	93	Yes	No
2	0	1	0	0	3	0	non-exposed	Han	52	male	Middle school or high school	1	Married/cohabiting	20000~99999	Current smoking	Yes	Not overweight	75	83	No	No
0	0	2	0	0	2	1	non-exposed	Han	52	male	Middle school or high school	1	Married/cohabiting	20000~99999	Current smoking	Yes	Not overweight	71.5	85.5	No	No
0	0	0	0	0	0	1	non-exposed	Han	52	male	Middle school or high school	1	Married/cohabiting	20000~99999	Current smoking	Yes	Not overweight	66	84	No	No
0	0	0	0	0	0	1	non-exposed	Han	52	male	Middle school or high school	1	Married/cohabiting	20000~99999	Current smoking	Yes	Not overweight	68.5	84.5	No	No
0	0	0	0	0	0	1	non-exposed	Han	52	male	Middle school or high school	1	Married/cohabiting	20000~99999	Current smoking	Yes	Not overweight	71	89	No	No
0	0	0	0	0	0	1	non-exposed	Han	51	male	Middle school or high school	1	Married/cohabiting	20000~99999	Current smoking	Yes	Not overweight	82.1	93.5	No	No
0	0	0	0	0	0	1	non-exposed	Han	51	male	Middle school or high school	1	Married/cohabiting	20000~99999	Current smoking	Yes	Not overweight	73.5	91	No	No
1	0	0	0	0	1	1	non-exposed	Han	51	male	Middle school or high school	1	Married/cohabiting	20000~99999	Current smoking	Yes	Not overweight	66	83.5	No	No
2	0	2	0	0	4	0	non-exposed	Han	51	male	Middle school or high school	1	Married/cohabiting	20000~99999	Current smoking	Yes	Not overweight	76	89	No	No
1	0	1	0	0	2	1	non-exposed	Han	51	male	Middle school or high school	1	Married/cohabiting	20000~99999	Current smoking	Yes	Not overweight	69	84	No	No
0	0	0	0	0	0	1	non-exposed	Han	50	male	Middle school or high school	1	Married/cohabiting	20000~99999	Current smoking	Yes	Not overweight	78.2	89	No	No
0	0	0	0	0	0	1	non-exposed	Han	50	male	Middle school or high school	1	Married/cohabiting	20000~99999	Current smoking	Yes	Not overweight	65	80	No	No
0	0	0	0	0	0	1	non-exposed	Han	50	male	Middle school or high school	1	Married/cohabiting	20000~99999	Current smoking	Yes	Not overweight	76	90.5	No	No
1	0	1	0	0	2	1	non-exposed	Han	50	male	Middle school or high school	1	Married/cohabiting	20000~99999	Current smoking	Yes	Not overweight	80	90	No	No
0	0	1	0	0	1	1	non-exposed	Han	49	male	Middle school or high school	1	Married/cohabiting	20000~99999	Current smoking	Yes	Not overweight	71	80.5	No	No
2	0	0	0	0	2	1	non-exposed	Han	49	male	Middle school or high school	1	Married/cohabiting	20000~99999	Current smoking	Yes	Not overweight	75	82	No	No
0	0	0	0	0	0	1	non-exposed	Han	49	male	Middle school or high school	1	Married/cohabiting	20000~99999	Current smoking	Yes	Not overweight	76.5	91.4	No	No
2	0	1	0	0	3	0	non-exposed	Han	49	male	Middle school or high school	1	Married/cohabiting	20000~99999	Current smoking	Yes	Not overweight	82	85	No	No
2	0	2	0	0	4	0	non-exposed	Han	48	male	Middle school or high school	1	Married/cohabiting	20000~99999	Current smoking	Yes	Not overweight	63	77	No	No
2	0	1	0	0	3	0	non-exposed	Han	48	male	Middle school or high school	1	Married/cohabiting	20000~99999	Current smoking	Yes	Not overweight	82.5	90.8	No	No
1	0	0	0	0	1	1	non-exposed	Han	48	male	Middle school or high school	1	Married/cohabiting	20000~99999	Current smoking	Yes	Not overweight	66.5	87	No	No
0	0	2	0	0	2	1	non-exposed	Han	48	male	Middle school or high school	1	Married/cohabiting	20000~99999	Current smoking	Yes	Not overweight	83	81	No	No
2	0	1	0	0	3	0	non-exposed	Han	48	male	Middle school or high school	1	Married/cohabiting	20000~99999	Current smoking	Yes	Not overweight	82.2	87.3	No	No
2	0	1	0	0	3	0	non-exposed	Han	48	male	Middle school or high school	1	Married/cohabiting	20000~99999	Current smoking	Yes	Not overweight	61	80	No	No
2	0	2	0	0	4	0	non-exposed	Han	48	male	Middle school or high school	1	Married/cohabiting	20000~99999	Current smoking	Yes	Not overweight	74	86	No	No
0	0	0	0	0	0	1	non-exposed	Han	48	male	Middle school or high school	1	Married/cohabiting	20000~99999	Current smoking	Yes	Not overweight	70	84	No	No
0	0	0	0	0	0	1	non-exposed	Han	48	male	Middle school or high school	1	Married/cohabiting	20000~99999	Current smoking	Yes	Not overweight	74	83	No	No
0	0	0	0	0	0	1	non-exposed	Han	47	male	Middle school or high school	1	Married/cohabiting	20000~99999	Current smoking	Yes	Not overweight	82.6	91.5	No	No
0	0	0	0	0	0	1	non-exposed	Han	47	male	Middle school or high school	1	Married/cohabiting	20000~99999	Current smoking	Yes	Not overweight	78	87	No	No
1	0	2	0	0	3	0	non-exposed	Han	47	male	Middle school or high school	1	Married/cohabiting	20000~99999	Current smoking	Yes	Not overweight	64	81	No	No
0	0	1	0	0	1	1	non-exposed	Han	47	male	Middle school or high school	1	Married/cohabiting	20000~99999	Current smoking	Yes	Not overweight	84	94	No	No
0	0	2	0	0	2	1	non-exposed	Han	47	male	Middle school or high school	1	Married/cohabiting	20000~99999	Current smoking	Yes	Not overweight	78	88	No	No
0	0	0	0	0	0	1	non-exposed	Han	47	male	Middle school or high school	1	Married/cohabiting	20000~99999	Current smoking	Yes	Not overweight	74.5	82	No	No
0	0	0	0	0	0	1	non-exposed	Han	47	male	Middle school or high school	1	Married/cohabiting	20000~99999	Current smoking	Yes	Not overweight	71	84	No	No
2	0	1	0	0	3	0	non-exposed	Han	46	male	Middle school or high school	1	Married/cohabiting	20000~99999	Current smoking	Yes	Not overweight	71	87	No	No
0	0	0	0	0	0	1	non-exposed	Han	46	male	Middle school or high school	1	Married/cohabiting	20000~99999	Current smoking	Yes	Not overweight	78.5	87	No	No
0	0	0	0	0	0	1	non-exposed	Han	46	male	Middle school or high school	1	Married/cohabiting	20000~99999	Current smoking	Yes	Not overweight	71	83	No	No
1	0	1	0	0	2	1	non-exposed	Han	46	male	Middle school or high school	1	Married/cohabiting	20000~99999	Current smoking	Yes	Not overweight	71	88	No	No
1	0	2	0	0	3	0	non-exposed	Han	46	male	Middle school or high school	1	Married/cohabiting	20000~99999	Current smoking	Yes	Not overweight	75	88.5	No	No
0	0	0	0	0	0	1	non-exposed	Han	46	male	Middle school or high school	1	Married/cohabiting	20000~99999	Current smoking	Yes	Not overweight	76	89	No	No
0	0	1	0	0	1	1	non-exposed	Han	46	male	Middle school or high school	1	Married/cohabiting	20000~99999	Current smoking	Yes	Not overweight	71.5	87	No	No
0	0	0	0	0	0	1	non-exposed	Han	46	male	Middle school or high school	1	Married/cohabiting	20000~99999	Current smoking	Yes	Not overweight	81	89	No	No
1	0	0	0	0	1	1	non-exposed	Han	46	male	Middle school or high school	1	Married/cohabiting	20000~99999	Current smoking	Yes	Not overweight	80	88.5	No	No
2	0	2	0	0	4	0	non-exposed	Han	45	male	Middle school or high school	1	Married/cohabiting	20000~99999	Current smoking	Yes	Not overweight	70	89	No	No
0	0	0	0	0	0	1	non-exposed	Han	45	male	Middle school or high school	1	Married/cohabiting	20000~99999	Current smoking	Yes	Not overweight	71	82	No	No
0	0	1	0	0	1	1	non-exposed	Han	45	male	Middle school or high school	1	Married/cohabiting	20000~99999	Current smoking	Yes	Not overweight	76	89	No	No
1	0	0	0	0	1	1	non-exposed	Han	45	male	Middle school or high school	1	Married/cohabiting	20000~99999	Current smoking	Yes	Not overweight	77	86	No	No
0	0	2	0	0	2	1	non-exposed	Han	45	male	Middle school or high school	1	Married/cohabiting	20000~99999	Current smoking	Yes	Not overweight	70	81.5	No	No
0	0	0	0	0	0	1	non-exposed	Han	45	male	Middle school or high school	1	Married/cohabiting	20000~99999	Current smoking	Yes	Not overweight	76	90	No	No
2	0	1	0	0	3	0	non-exposed	Han	45	male	Middle school or high school	1	Married/cohabiting	20000~99999	Current smoking	Yes	Not overweight	62	78	No	No
0	0	0	0	0	0	1	non-exposed	Han	45	male	Middle school or high school	1	Married/cohabiting	20000~99999	Current smoking	Yes	Not overweight	72.5	90	No	No
2	0	2	0	0	4	0	non-exposed	Han	44	male	Middle school or high school	1	Married/cohabiting	20000~99999	Current smoking	Yes	Not overweight	71	86	No	No
0	0	0	0	0	0	1	non-exposed	Han	44	male	Middle school or high school	1	Married/cohabiting	20000~99999	Current smoking	Yes	Not overweight	73	84	No	No
0	0	0	0	0	0	1	non-exposed	Han	44	male	Middle school or high school	1	Married/cohabiting	20000~99999	Current smoking	Yes	Not overweight	76.5	84	No	No
0	0	0	0	0	0	1	non-exposed	Han	44	male	Middle school or high school	1	Married/cohabiting	20000~99999	Current smoking	Yes	Not overweight	74	83	Yes	No
0	0	0	0	0	0	1	non-exposed	Han	44	male	Middle school or high school	1	Married/cohabiting	20000~99999	Current smoking	Yes	Not overweight	72	84	No	No
0	0	0	0	0	0	1	non-exposed	Han	43	male	Middle school or high school	1	Married/cohabiting	20000~99999	Current smoking	Yes	Not overweight	70	86	No	No
0	0	0	0	0	0	1	non-exposed	Han	43	male	Middle school or high school	1	Married/cohabiting	20000~99999	Current smoking	Yes	Not overweight	89.5	94.5	No	No
2	0	2	0	0	4	0	non-exposed	Han	43	male	Middle school or high school	1	Married/cohabiting	20000~99999	Current smoking	Yes	Not overweight	70	86.9	No	No
1	0	1	0	0	2	1	non-exposed	Han	43	male	Middle school or high school	1	Married/cohabiting	20000~99999	Current smoking	Yes	Not overweight	76	93.4	No	No
0	0	0	0	0	0	1	non-exposed	Han	43	male	Middle school or high school	1	Married/cohabiting	20000~99999	Current smoking	Yes	Not overweight	80.5	85	No	No
0	0	0	0	0	0	1	non-exposed	Han	43	male	Middle school or high school	1	Married/cohabiting	20000~99999	Current smoking	Yes	Not overweight	69	85.5	No	No
0	0	0	0	0	0	1	non-exposed	Han	43	male	Middle school or high school	1	Married/cohabiting	20000~99999	Current smoking	Yes	Not overweight	77	89.5	No	No
0	0	0	0	0	0	1	non-exposed	Han	43	male	Middle school or high school	1	Married/cohabiting	20000~99999	Current smoking	Yes	Not overweight	63	76	No	No
2	0	0	0	0	2	1	non-exposed	Han	42	male	Middle school or high school	1	Married/cohabiting	20000~99999	Current smoking	Yes	Not overweight	72	80	No	No
0	0	0	0	0	0	1	non-exposed	Han	42	male	Middle school or high school	1	Married/cohabiting	20000~99999	Current smoking	Yes	Not overweight	72	87	No	No
2	0	2	0	0	4	0	non-exposed	Han	42	male	Middle school or high school	1	Married/cohabiting	20000~99999	Current smoking	Yes	Not overweight	72	80	No	No
0	0	0	0	0	0	1	non-exposed	Han	42	male	Middle school or high school	1	Married/cohabiting	20000~99999	Current smoking	Yes	Not overweight	72	89.5	No	No
2	0	2	0	0	4	0	non-exposed	Han	42	male	Middle school or high school	1	Married/cohabiting	20000~99999	Current smoking	Yes	Not overweight	69	86	No	No
1	0	2	0	0	3	0	non-exposed	Han	42	male	Middle school or high school	1	Married/cohabiting	20000~99999	Current smoking	Yes	Not overweight	73	93	No	No
2	0	2	0	0	4	0	non-exposed	Han	41	male	Middle school or high school	1	Married/cohabiting	20000~99999	Current smoking	Yes	Not overweight	66.5	84	No	No
[truncated: 16,377 more rows]
